## Supplemental materials

### Concise synthesis and *in vitro* anticancer activity of benzo[*g*][1]benzopyrano[4,3-*b*]indol-6(13*H*)-ones (BBPIs), topoisomerase I inhibitors based on the marine alkaloid lamellarin

Fumito Ishibashi<sup>a\*</sup>, Tsutomu Fukuda<sup>b</sup>, Shijiao Zha<sup>a</sup>, Aya Hashirano<sup>a</sup>, Shotaro Hirao<sup>c</sup>,  
and Masatomo Iwao<sup>d</sup>

<sup>a</sup>*Graduate School of Fisheries and Environmental Sciences, Nagasaki University,  
Nagasaki, Japan*

<sup>b</sup>*Environmental Protection Center, Nagasaki University, Nagasaki, Japan*

<sup>c</sup>*Faculty of Science and Technology, Oita University, Dannoharu, Japan*

<sup>d</sup>*Graduate School of Engineering, Nagasaki University, Nagasaki, Japan*

## Contents

|                                                                                                                                                                                  |    |
|----------------------------------------------------------------------------------------------------------------------------------------------------------------------------------|----|
| Fig. 1. Concentration-response curves for cytotoxicity of <b>1a</b> , <b>1c</b> , <b>2a</b> , and <b>2c</b> against HeLa cells at 72 h. The bars indicate standard errors. ....  | 5  |
| Fig. 2. Concentration-response curves for cytotoxicity of <b>1a</b> , <b>1c</b> , <b>2a</b> , and <b>2c</b> against MCF-7 cells at 72 h. The bars indicate standard errors. .... | 6  |
| Fig. 3. Concentration-response curves for cytotoxicity of <b>1a</b> , <b>1c</b> , <b>2a</b> , and <b>2c</b> against A549 cells at 72 h. The bars indicate standard errors. ....  | 7  |
| Fig. 4. Concentration-response curves for cytotoxicity of <b>1a</b> , <b>1c</b> , <b>2a</b> , and <b>2c</b> against Vero cells at 72 h. The bars indicate standard errors. ....  | 8  |
| Fig. 5. <sup>1</sup> H NMR Spectrum of Compound <b>4</b> (400 MHz, CDCl <sub>3</sub> ) .....                                                                                     | 9  |
| Fig. 6. <sup>13</sup> C NMR Spectrum of Compound <b>4</b> (100 MHz, CDCl <sub>3</sub> ) .....                                                                                    | 10 |
| Fig. 7. DEPT Spectrum of Compound <b>4</b> (100 MHz, CDCl <sub>3</sub> ) .....                                                                                                   | 11 |
| Fig. 8. COSY Spectrum of Compound <b>4</b> .....                                                                                                                                 | 12 |
| Fig. 9. HSQC Spectrum of Compound <b>4</b> .....                                                                                                                                 | 13 |
| Fig. 10. HMBC Spectrum of Compound <b>4</b> .....                                                                                                                                | 14 |
| Fig. 11. <sup>1</sup> H NMR Spectrum of Compound <b>5a</b> (400 MHz, CDCl <sub>3</sub> ).....                                                                                    | 15 |
| Fig. 12. <sup>13</sup> C NMR Spectrum of Compound <b>5a</b> (100 MHz, CDCl <sub>3</sub> ) .....                                                                                  | 16 |
| Fig. 13. DEPT Spectrum of Compound <b>5a</b> .....                                                                                                                               | 17 |
| Fig. 14. <sup>1</sup> H NMR Spectrum of Compound <b>6a</b> (300 MHz, CDCl <sub>3</sub> ) .....                                                                                   | 18 |
| Fig. 15. <sup>13</sup> C NMR Spectrum of Compound <b>6a</b> (100 MHz, CDCl <sub>3</sub> ) .....                                                                                  | 19 |
| Fig. 16. DEPT Spectrum of Compound <b>6a</b> .....                                                                                                                               | 20 |
| Fig. 17. COSY Spectrum of Compound <b>6a</b> .....                                                                                                                               | 21 |
| Fig. 18. HSQC Spectrum of Compound <b>6a</b> .....                                                                                                                               | 22 |
| Fig. 19. HMBC Spectrum of Compound <b>6a</b> .....                                                                                                                               | 23 |
| Fig. 20. <sup>1</sup> H NMR Spectrum of Compound <b>7</b> (400 MHz, CDCl <sub>3</sub> ) .....                                                                                    | 24 |
| Fig. 21. <sup>13</sup> C NMR Spectrum of Compound <b>7</b> (100 MHz, CDCl <sub>3</sub> ) .....                                                                                   | 25 |
| Fig. 22. DEPT Spectrum of Compound <b>7</b> (100 MHz, CDCl <sub>3</sub> ) .....                                                                                                  | 26 |
| Fig. 23. <sup>1</sup> H NMR Spectrum of Compound <b>8</b> (500 MHz, DMSO- <i>d</i> <sub>6</sub> ) .....                                                                          | 27 |
| Fig. 24. <sup>13</sup> C NMR Spectrum of Compound <b>8</b> (125 MHz, DMSO- <i>d</i> <sub>6</sub> ) .....                                                                         | 28 |
| Fig. 25. HSQC Spectrum of Compound <b>8</b> (DMSO- <i>d</i> <sub>6</sub> ) .....                                                                                                 | 29 |
| Fig. 26. HMBC Spectrum of Compound <b>8</b> (DMSO- <i>d</i> <sub>6</sub> ) .....                                                                                                 | 30 |
| Fig. 27. <sup>1</sup> H NMR Spectrum of Compound <b>12</b> (400 MHz, CDCl <sub>3</sub> ) .....                                                                                   | 31 |
| Fig. 28. <sup>13</sup> C NMR Spectrum of Compound <b>12</b> (100 MHz, CDCl <sub>3</sub> ) .....                                                                                  | 32 |
| Fig. 29. DEPT Spectrum of Compound <b>12</b> .....                                                                                                                               | 33 |
| Fig. 30. <sup>1</sup> H NMR Spectrum of Compound <b>13</b> (400 MHz, CDCl <sub>3</sub> ) .....                                                                                   | 34 |

|                                                                                                   |    |
|---------------------------------------------------------------------------------------------------|----|
| Fig. 31. <sup>13</sup> C NMR Spectrum of Compound <b>13</b> (100 MHz, CDCl <sub>3</sub> ) .....   | 35 |
| Fig. 32. DEPT Spectrum of Compound <b>13</b> .....                                                | 36 |
| Fig. 33. <sup>1</sup> H NMR Spectrum of Compound <b>14</b> (400 MHz, CDCl <sub>3</sub> ) .....    | 37 |
| Fig. 34. <sup>13</sup> C NMR Spectrum of Compound <b>14</b> (100 MHz, CDCl <sub>3</sub> ) .....   | 38 |
| Fig. 35. DEPT Spectrum of Compound <b>14</b> .....                                                | 39 |
| Fig. 36. <sup>1</sup> H NMR Spectrum of Compound <b>15</b> (300 MHz, CDCl <sub>3</sub> ) .....    | 40 |
| Fig. 37. <sup>13</sup> C NMR Spectrum of Compound <b>15</b> (75 MHz, CDCl <sub>3</sub> ) .....    | 41 |
| Fig. 38. <sup>1</sup> H NMR Spectrum of Compound <b>16</b> (300 MHz, CDCl <sub>3</sub> ) .....    | 42 |
| Fig. 39. <sup>13</sup> C NMR Spectrum of Compound <b>16</b> (75 MHz, CDCl <sub>3</sub> ) .....    | 43 |
| Fig. 40. <sup>1</sup> H NMR Spectrum of Compound <b>17</b> (400 MHz, CDCl <sub>3</sub> ) .....    | 44 |
| Fig. 41. <sup>13</sup> C NMR Spectrum of Compound <b>17</b> (125 MHz, CDCl <sub>3</sub> ) .....   | 45 |
| Fig. 42. COSY Spectrum of Compound <b>17</b> .....                                                | 46 |
| Fig. 43. HSQC Spectrum of Compound <b>17</b> .....                                                | 47 |
| Fig. 44. HMBC Spectrum of Compound <b>17</b> .....                                                | 48 |
| Fig. 45. <sup>1</sup> H NMR Spectrum of Compound <b>18</b> (300 MHz, CDCl <sub>3</sub> ) .....    | 49 |
| Fig. 46. <sup>1</sup> H NMR Spectrum of Compound <b>19a</b> (400 MHz, CDCl <sub>3</sub> ).....    | 50 |
| Fig. 47. <sup>1</sup> H NMR Spectrum of Compound <b>19b</b> (400 MHz, CDCl <sub>3</sub> ) .....   | 51 |
| Fig. 48. <sup>13</sup> C NMR Spectrum of Compound <b>19b</b> (100 MHz, CDCl <sub>3</sub> ) .....  | 52 |
| Fig. 49. DEPT Spectrum of <b>19b</b> .....                                                        | 53 |
| Fig. 50. <sup>1</sup> H NMR Spectrum of Compound <b>20a</b> (300 MHz, CDCl <sub>3</sub> ).....    | 54 |
| Fig. 51. <sup>1</sup> H NMR Spectrum of Compound <b>20b</b> (500 MHz, CDCl <sub>3</sub> ) .....   | 55 |
| Fig. 52. <sup>13</sup> C NMR Spectrum of Compound <b>20b</b> (125 MHz, CDCl <sub>3</sub> ) .....  | 56 |
| Fig. 53. <sup>1</sup> H NMR Spectrum of Compound <b>20d</b> (400 MHz, CDCl <sub>3</sub> ) .....   | 57 |
| Fig. 54. <sup>13</sup> C NMR Spectrum of Compound <b>20d</b> (100 MHz, CDCl <sub>3</sub> ) .....  | 58 |
| Fig. 55. DEPT Spectrum of Compound <b>20d</b> (100 MHz, CDCl <sub>3</sub> ) .....                 | 59 |
| Fig. 56. <sup>1</sup> H NMR Spectrum of Compound <b>20e</b> (500 MHz, CDCl <sub>3</sub> ).....    | 60 |
| Fig. 57. <sup>13</sup> C NMR Spectrum of Compound <b>20e</b> (125 MHz, CDCl <sub>3</sub> ).....   | 61 |
| Fig. 58. <sup>1</sup> H NMR Spectrum of Compound <b>2a</b> (500 MHz, DMSO-d <sub>6</sub> ) .....  | 62 |
| Fig. 59. <sup>13</sup> C NMR Spectrum of Compound <b>2a</b> (125 MHz, DMSO-d <sub>6</sub> ) ..... | 63 |
| Fig. 60. <sup>1</sup> H NMR Spectrum of Compound <b>2b</b> (400 MHz, DMSO-d <sub>6</sub> ) .....  | 64 |
| Fig. 61. <sup>13</sup> C NMR Spectrum of Compound <b>2b</b> (100 MHz, DMSO-d <sub>6</sub> ) ..... | 65 |
| Fig. 62. <sup>1</sup> H NMR Spectrum of Compound <b>2c</b> (500 MHz, DMSO-d <sub>6</sub> ).....   | 66 |
| Fig. 63. <sup>13</sup> C NMR Spectrum of Compound <b>2c</b> (125 MHz, DMSO-d <sub>6</sub> ).....  | 67 |
| Fig. 64. <sup>1</sup> H NMR Spectrum of Compound <b>2d</b> (500 MHz, DMSO-d <sub>6</sub> ) .....  | 68 |
| Fig. 65. <sup>13</sup> C NMR Spectrum of Compound <b>2d</b> (125 MHz, DMSO-d <sub>6</sub> ) ..... | 69 |
| Fig. 66. <sup>1</sup> H NMR Spectrum of Compound <b>2e</b> (500 MHz, DMSO-d <sub>6</sub> ).....   | 70 |

Fig. 67.  $^{13}\text{C}$  NMR Spectrum of Compound **2e** (125 MHz, DMSO- $d_6$ ).....71

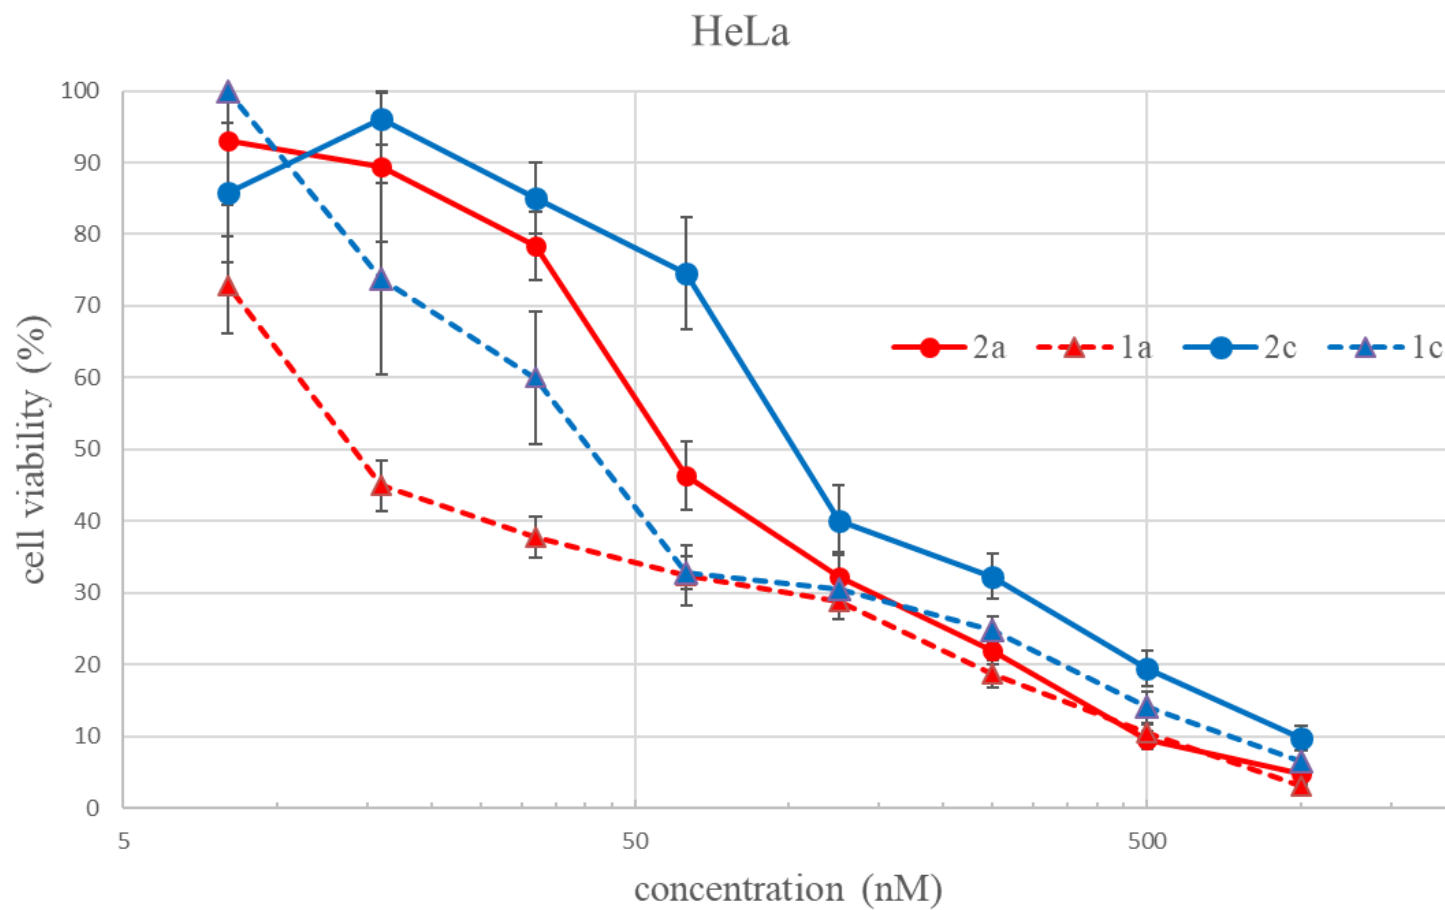

Fig. 1. Concentration-response curves for cytotoxicity of **1a**, **1c**, **2a**, and **2c** against HeLa cells at 72 h. The bars indicate standard errors.

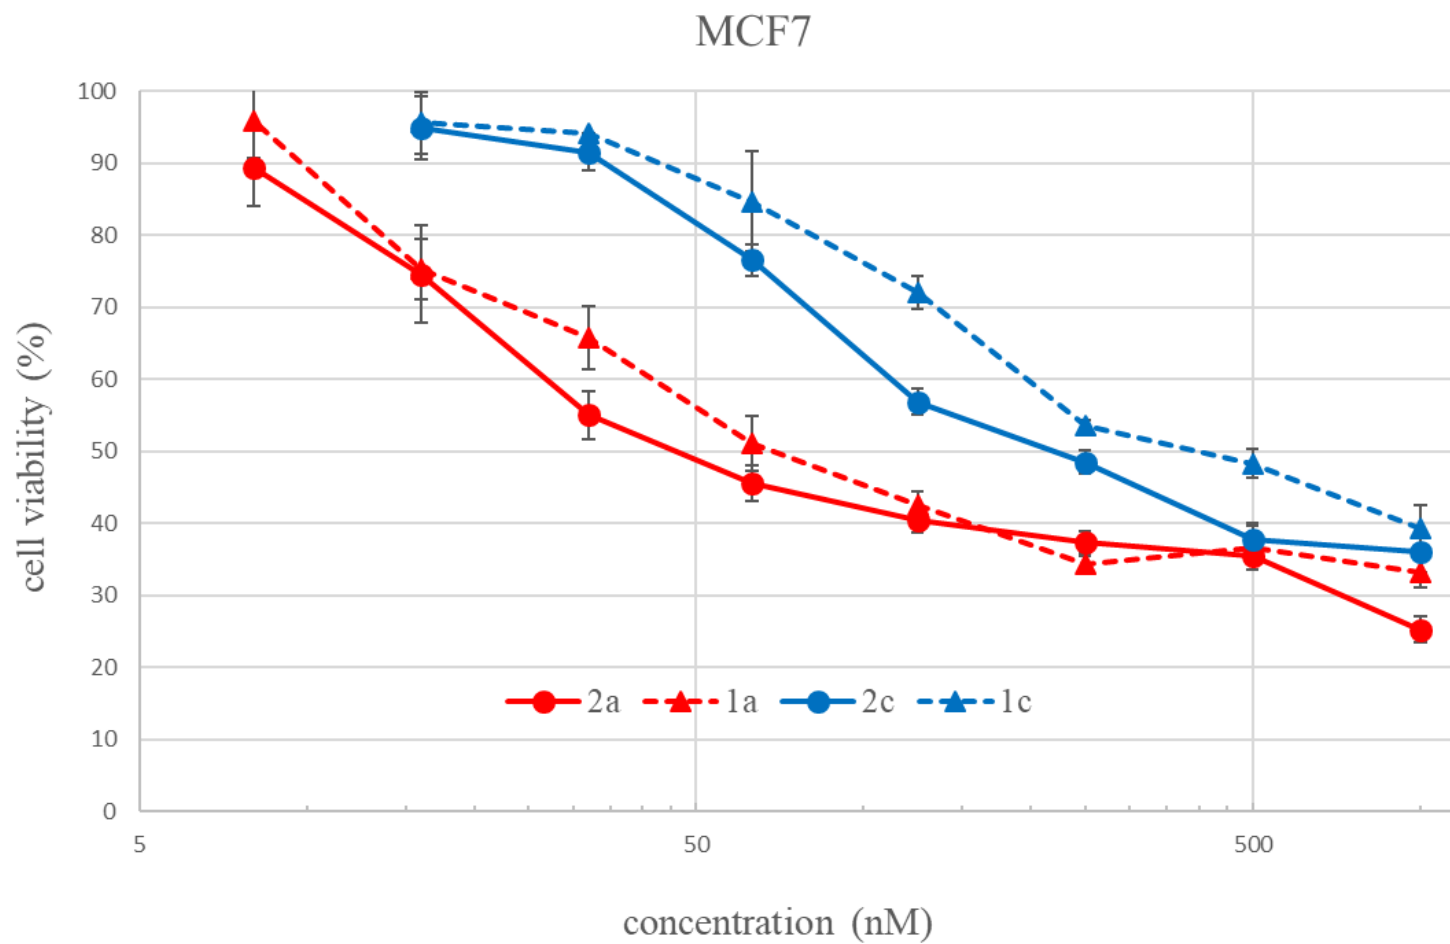

Fig. 2. Concentration-response curves for cytotoxicity of **1a**, **1c**, **2a**, and **2c** against MCF-7 cells at 72 h. The bars indicate standard errors.

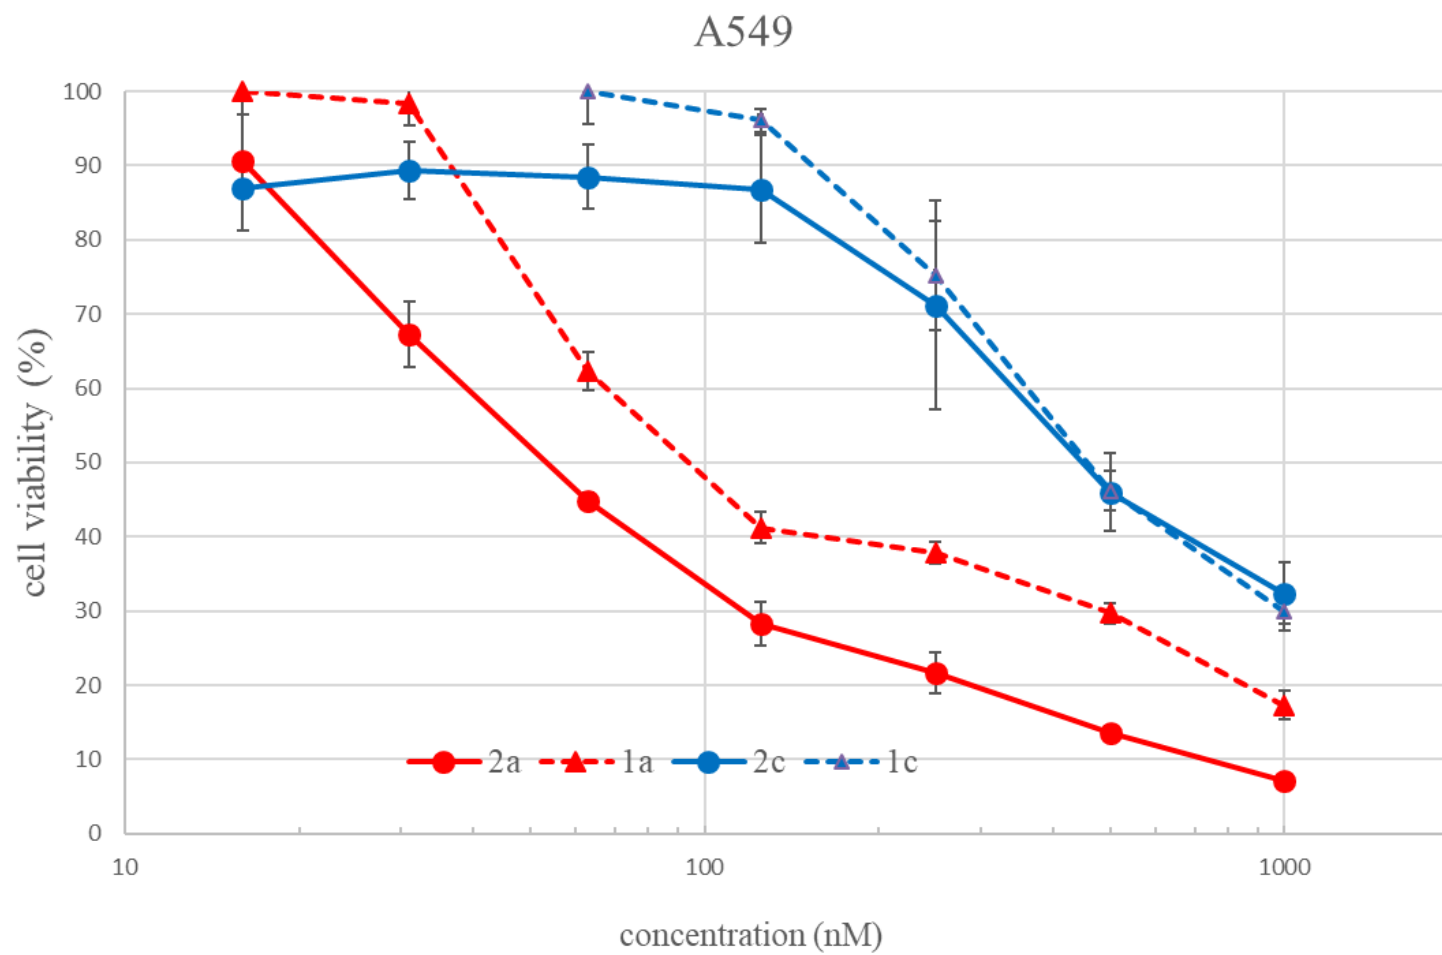

Fig. 3. Concentration-response curves for cytotoxicity of **1a**, **1c**, **2a**, and **2c** against A549 cells at 72 h. The bars indicate standard errors.

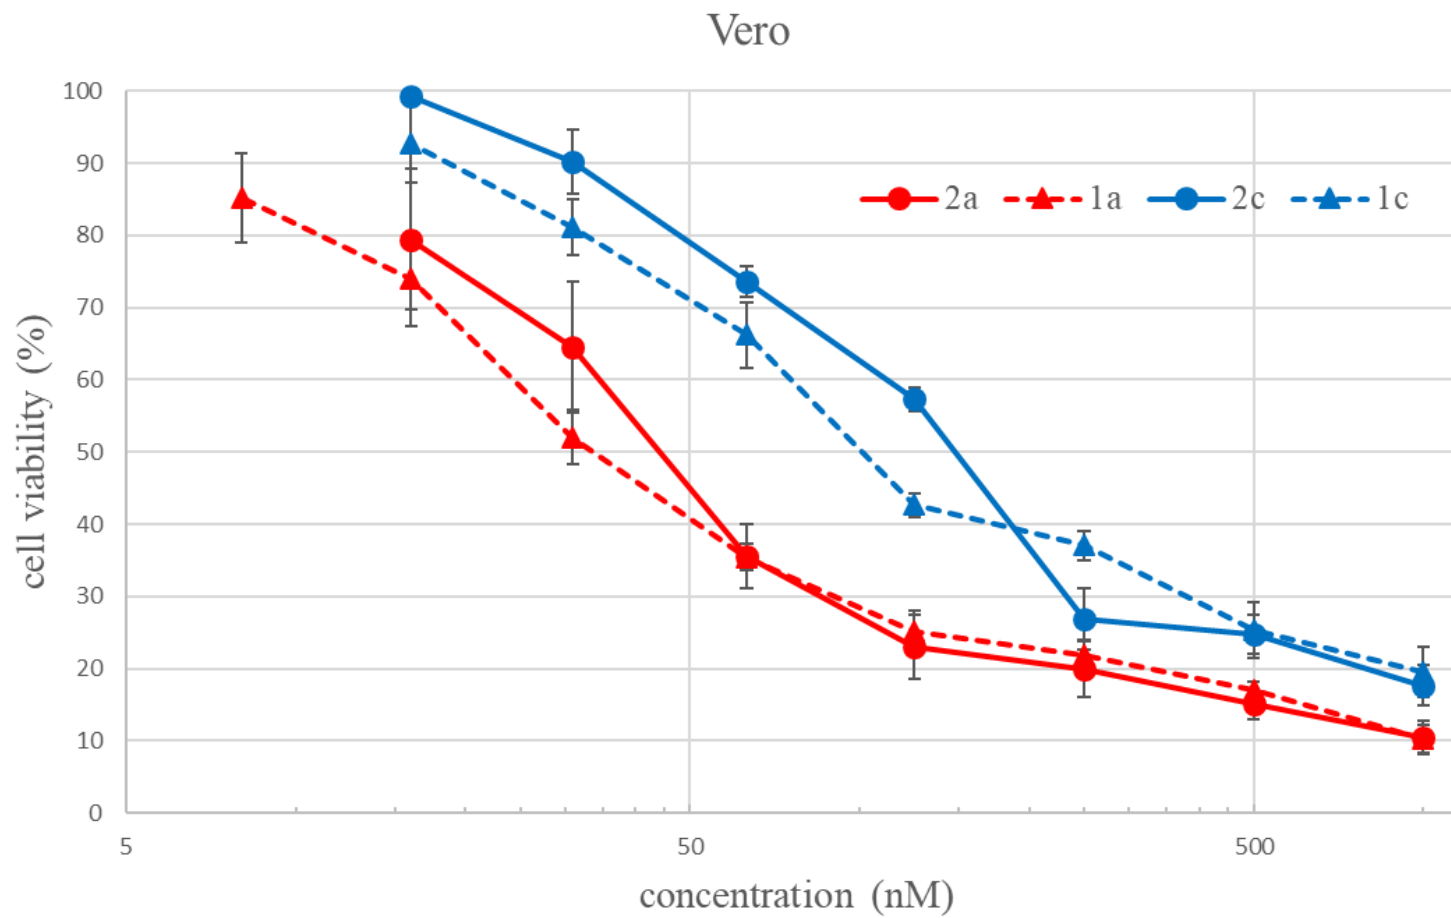

Fig. 4. Concentration-response curves for cytotoxicity of **1a**, **1c**, **2a**, and **2c** against Vero cells at 72 h. The bars indicate standard errors.



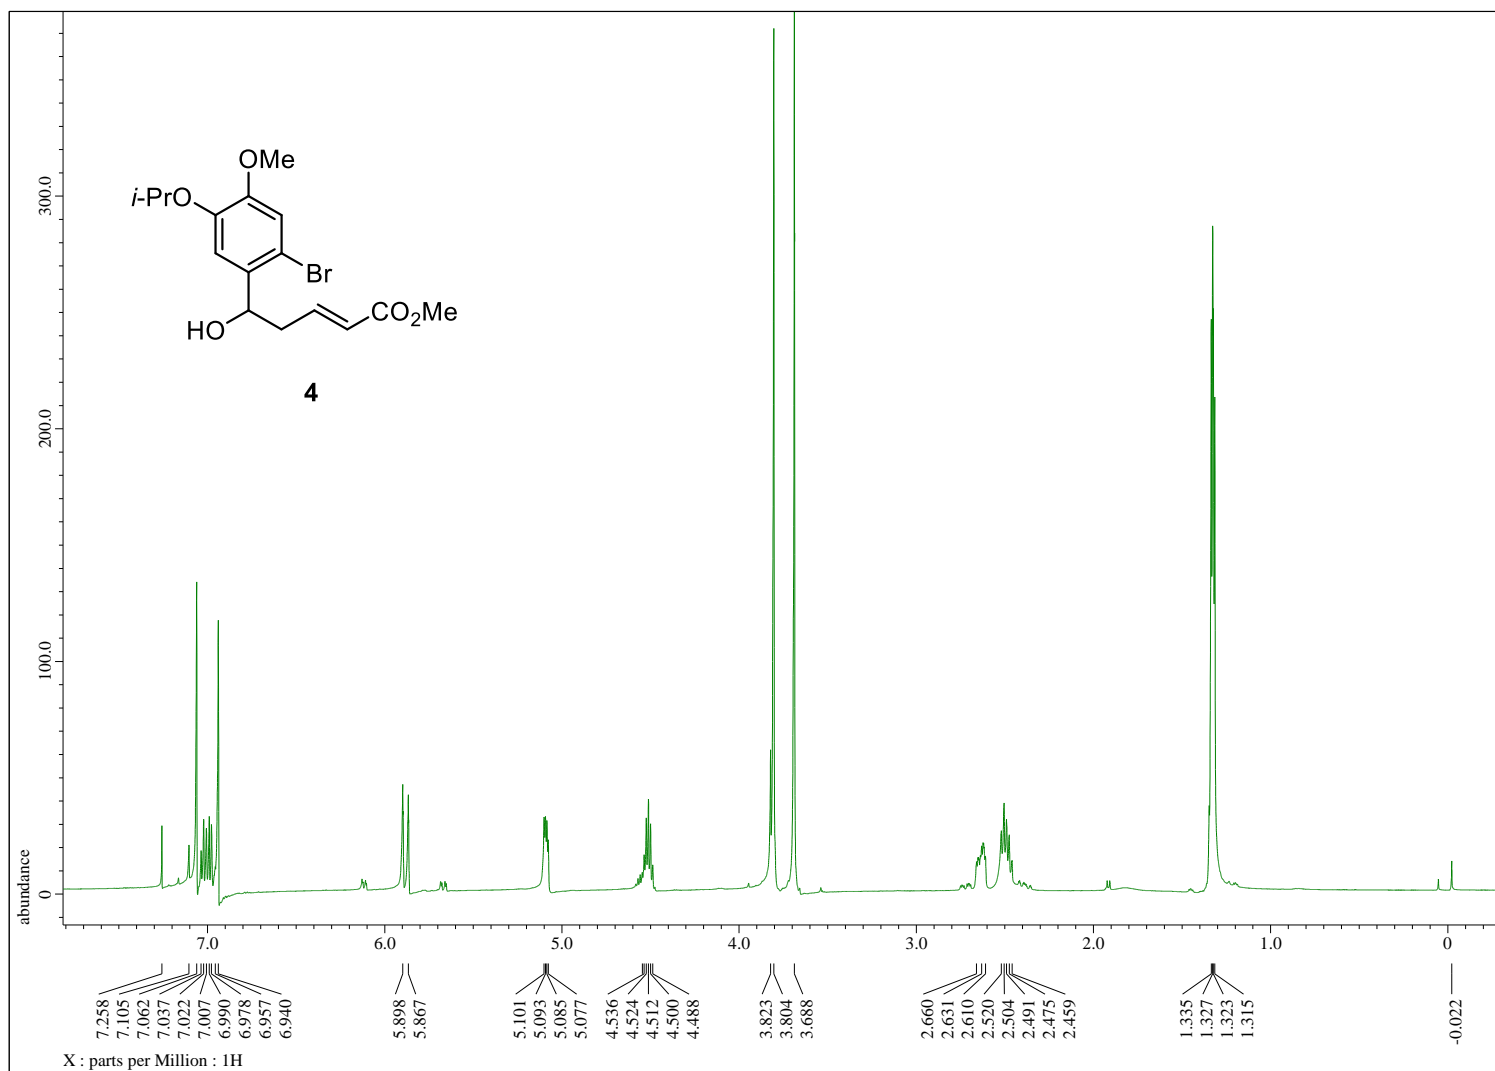

Fig. 5.  $^1\text{H}$  NMR Spectrum of Compound 4 (400 MHz,  $\text{CDCl}_3$ )

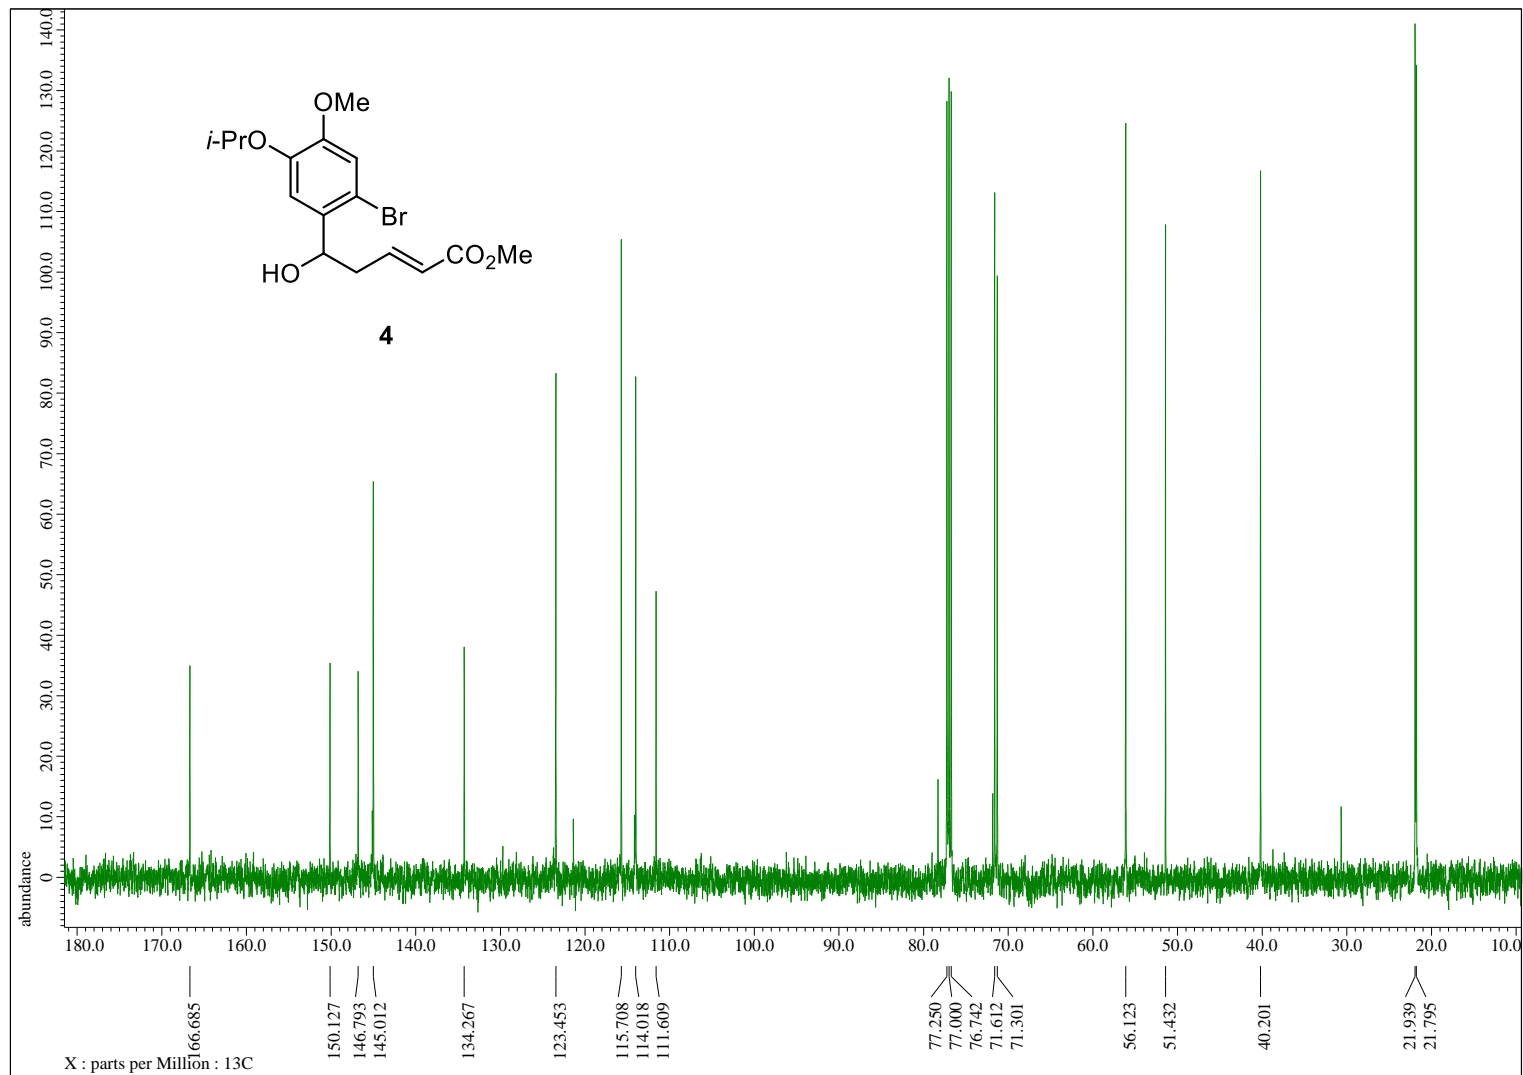

Fig. 6.  $^{13}\text{C}$  NMR Spectrum of Compound **4** (100 MHz,  $\text{CDCl}_3$ )

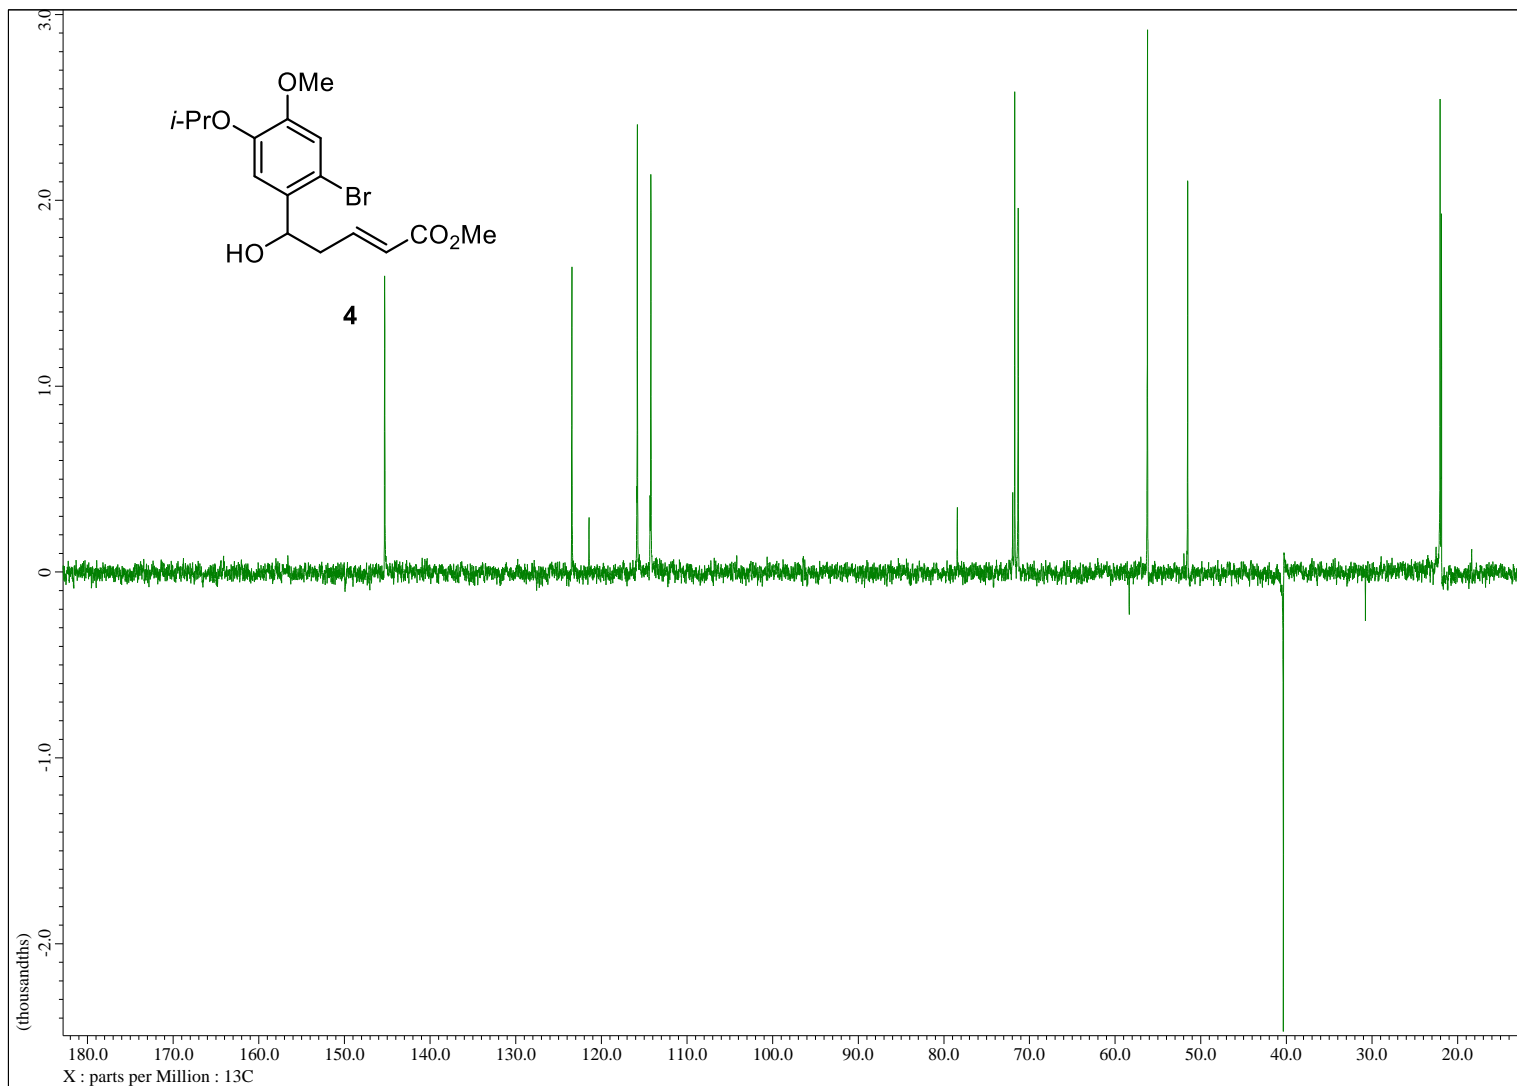

Fig. 7. DEPT Spectrum of Compound 4 (100 MHz, CDCl<sub>3</sub>)

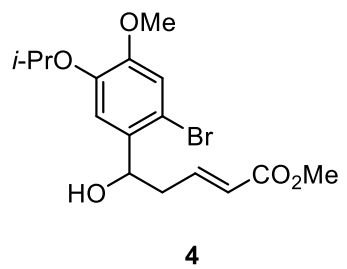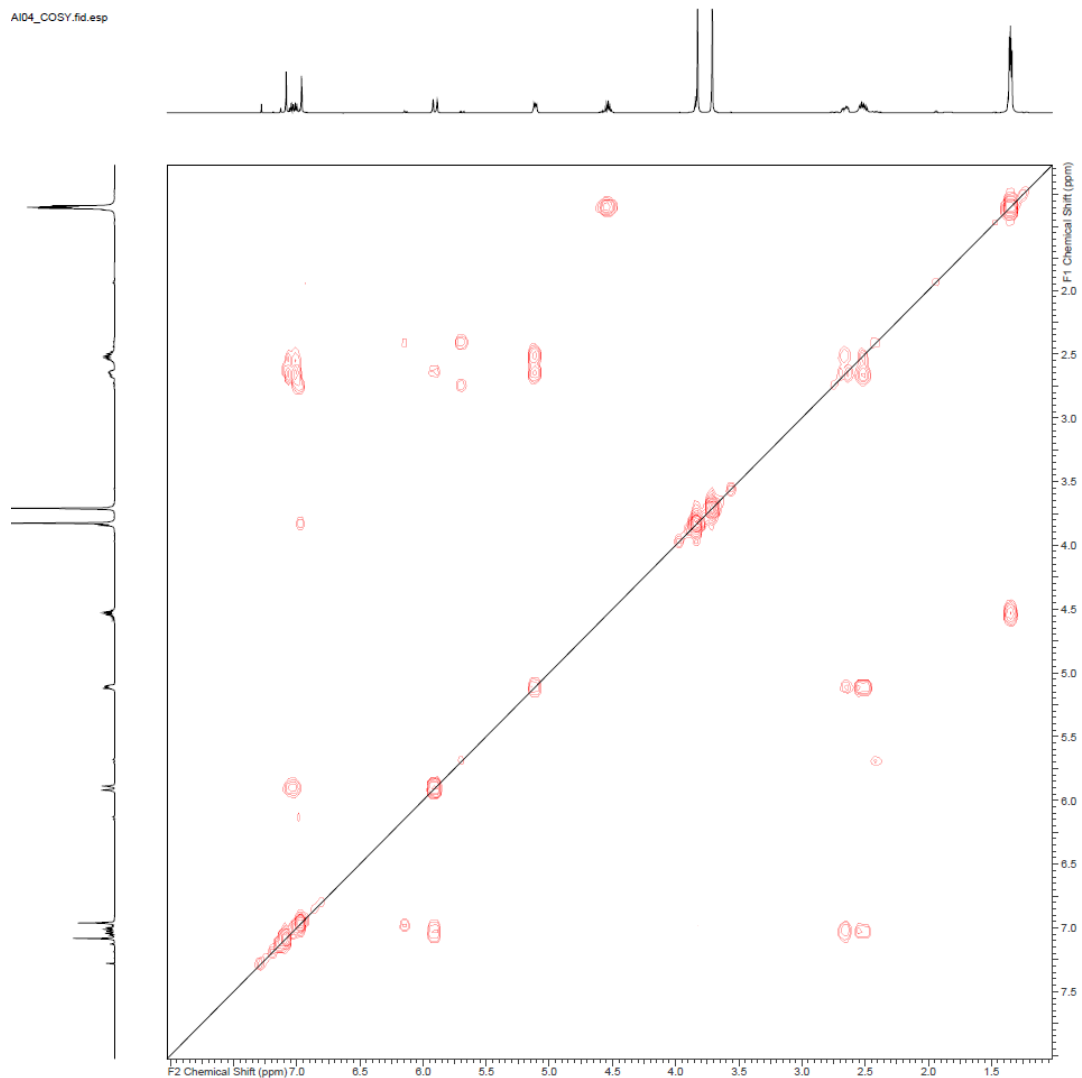

Fig. 8. COSY Spectrum of Compound **4**

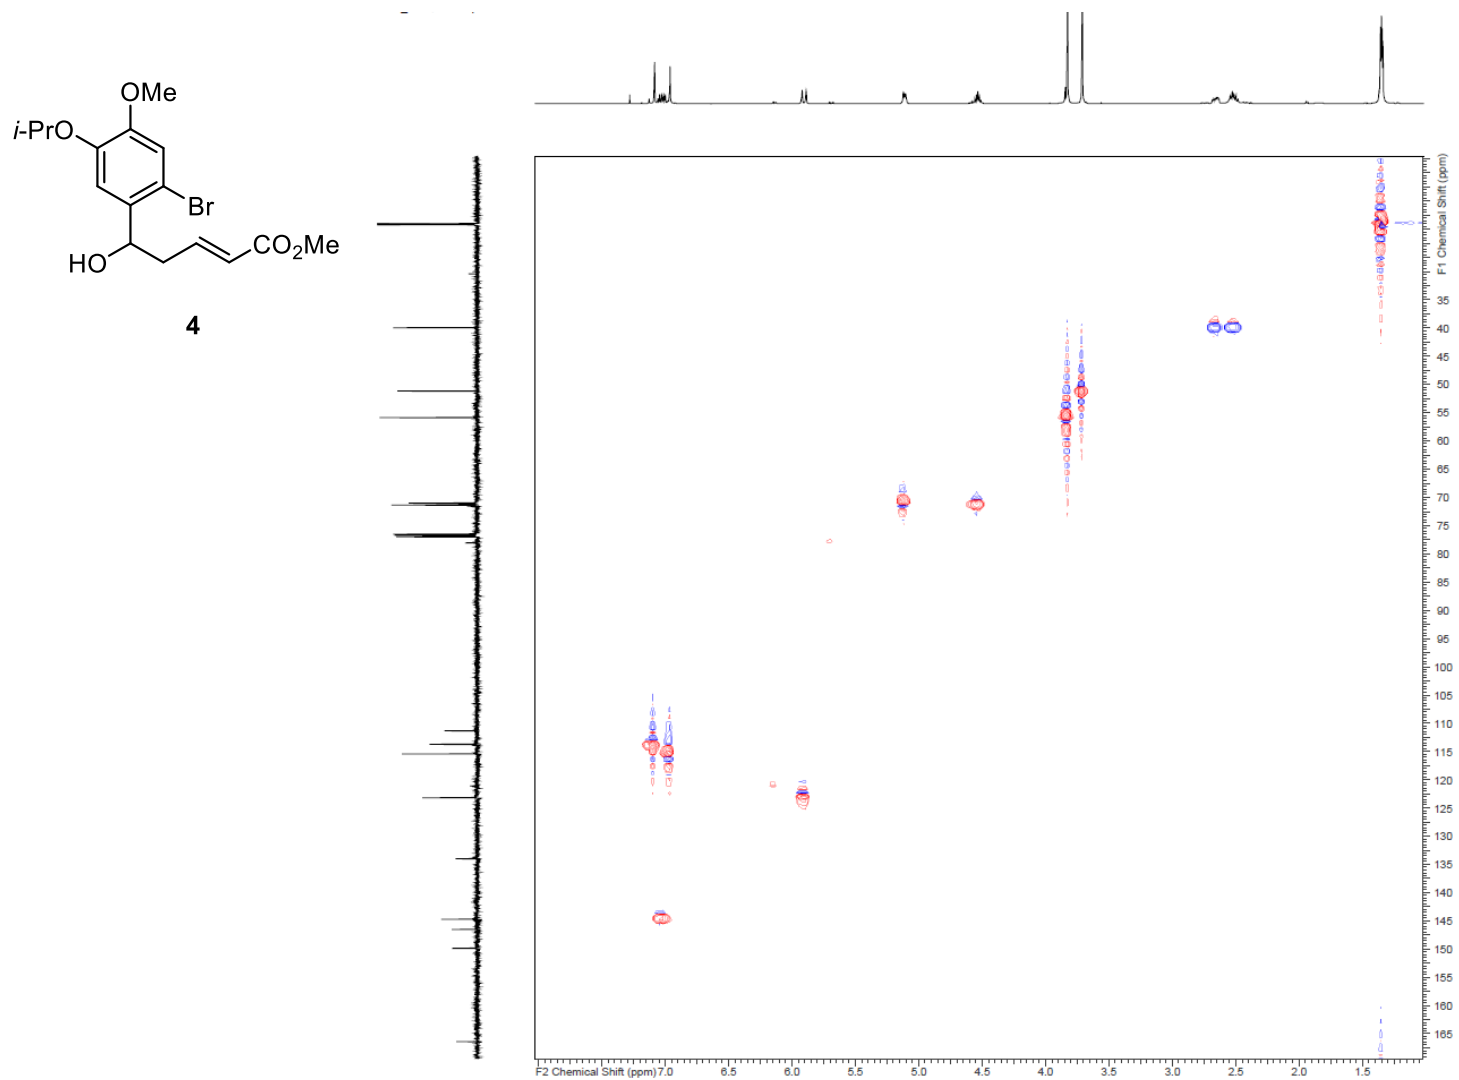

Fig. 9. HSQC Spectrum of Compound 4

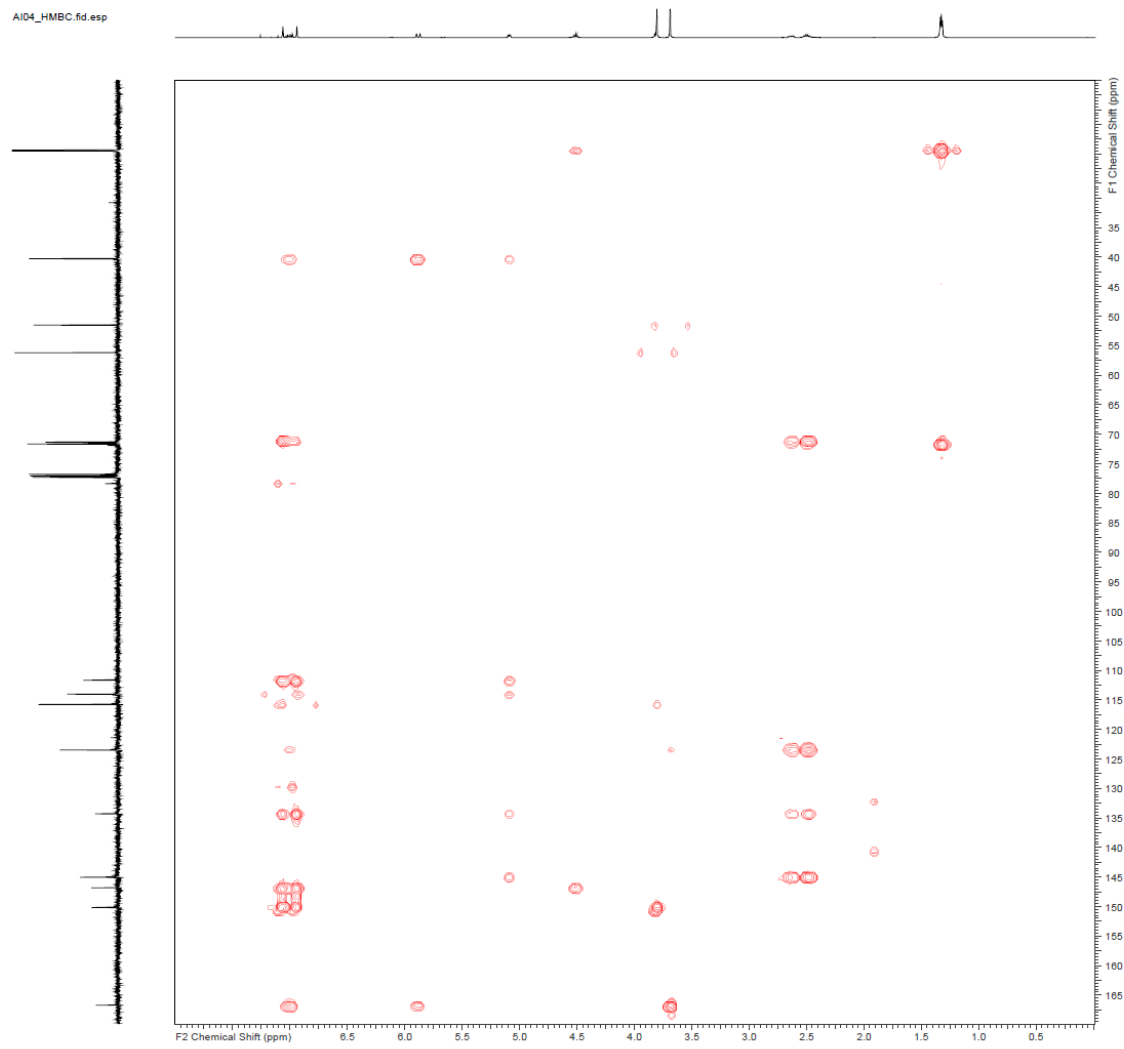

Fig. 10. HMBC Spectrum of Compound 4

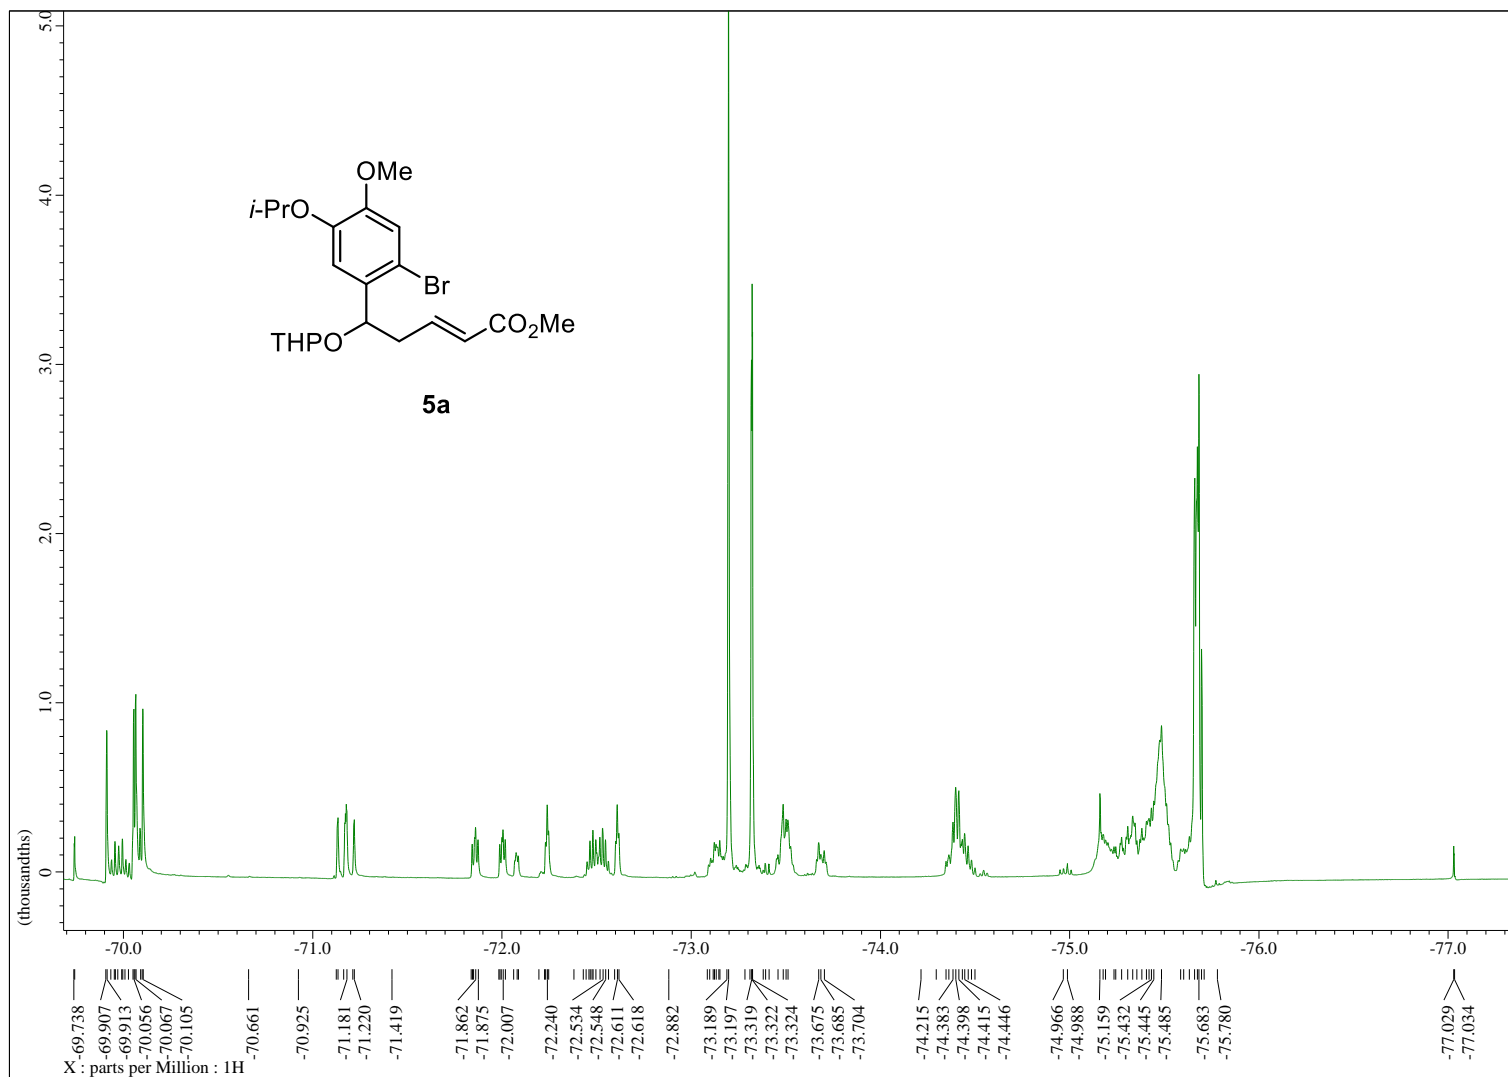

Fig. 11. <sup>1</sup>H NMR Spectrum of Compound **5a** (400 MHz, CDCl<sub>3</sub>)

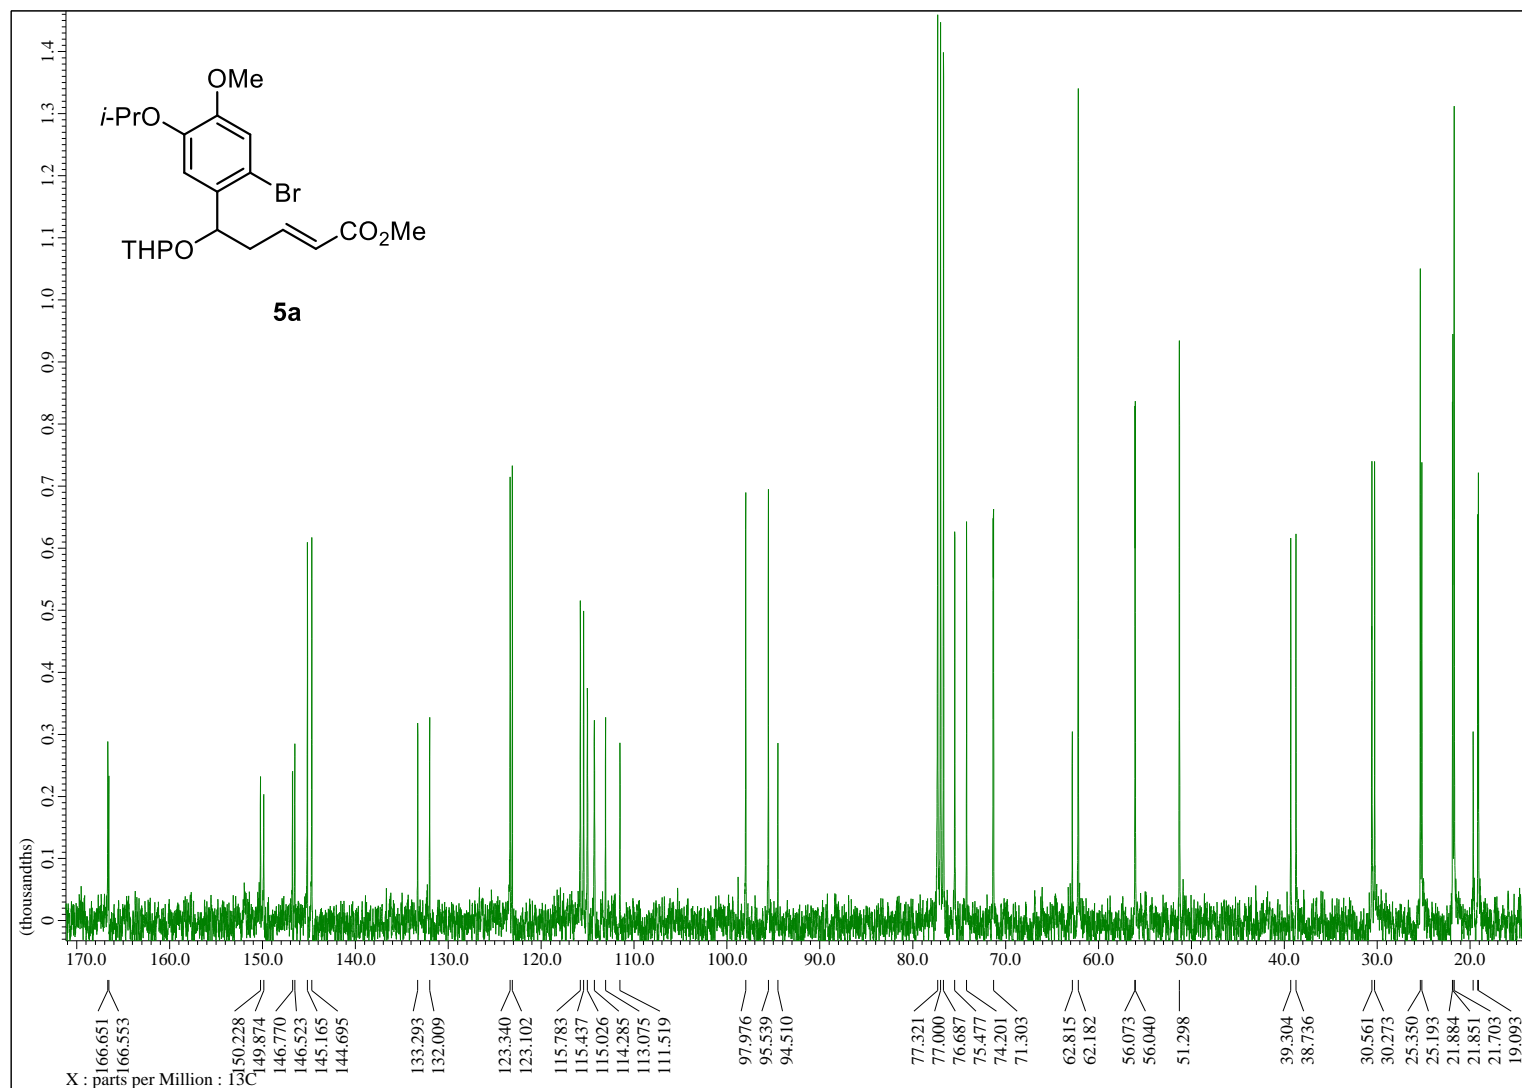

Fig. 12.  $^{13}\text{C}$  NMR Spectrum of Compound **5a** (100 MHz,  $\text{CDCl}_3$ )



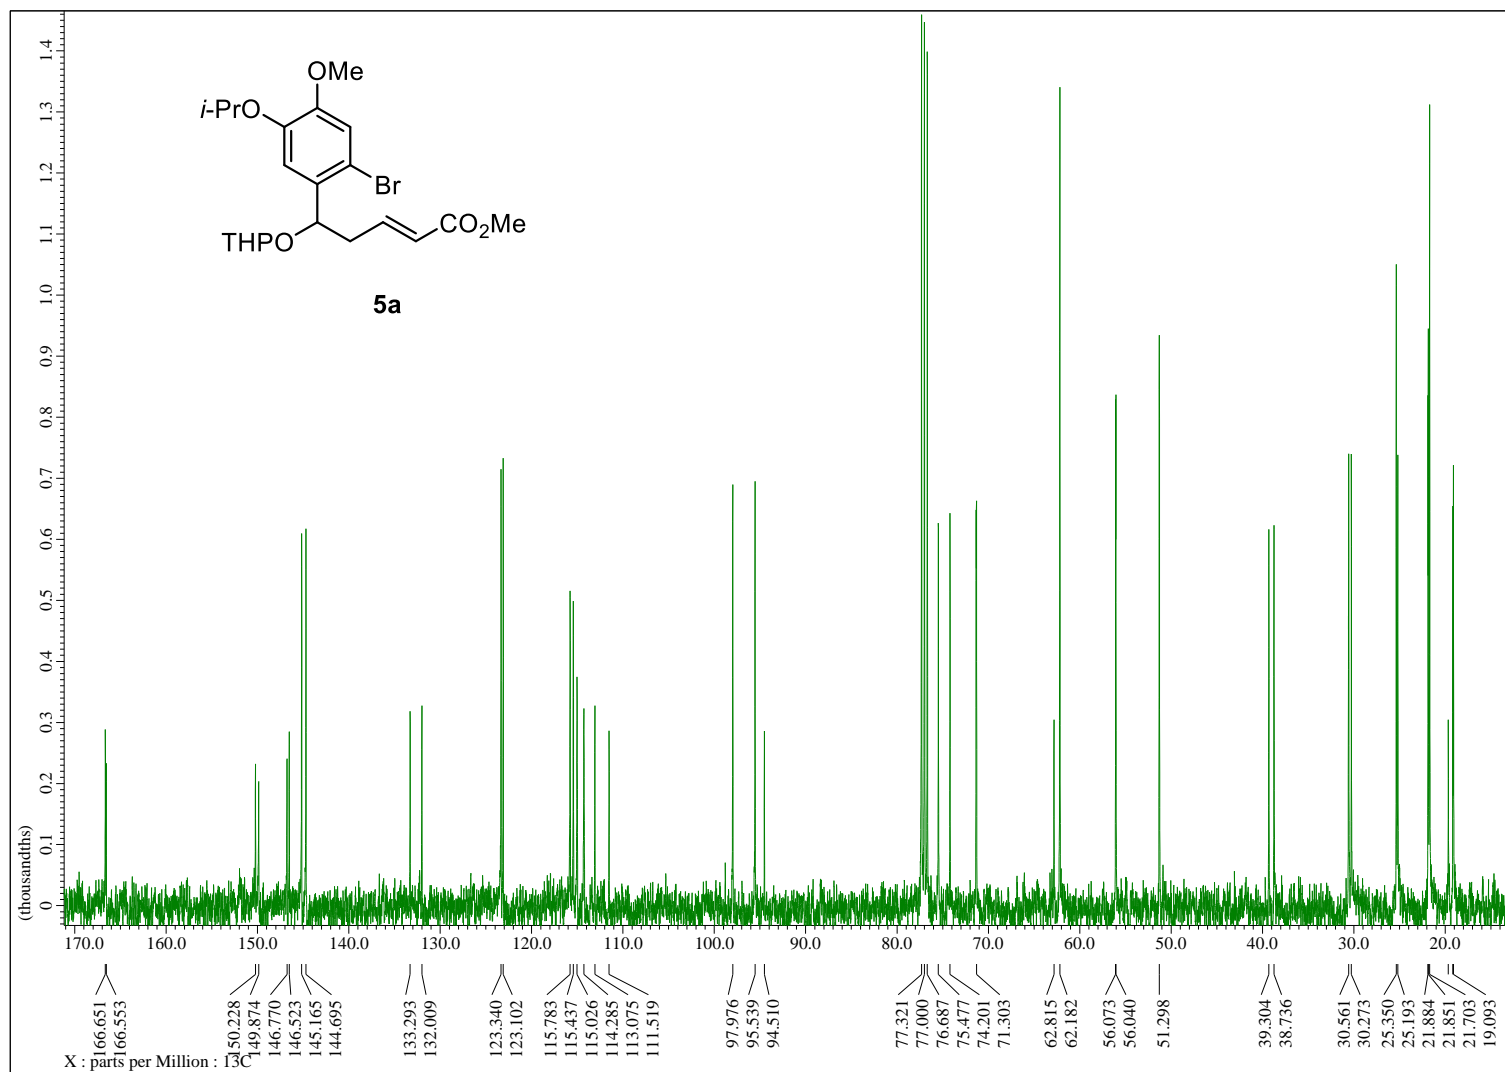

Fig. 13. DEPT Spectrum of Compound **5a**

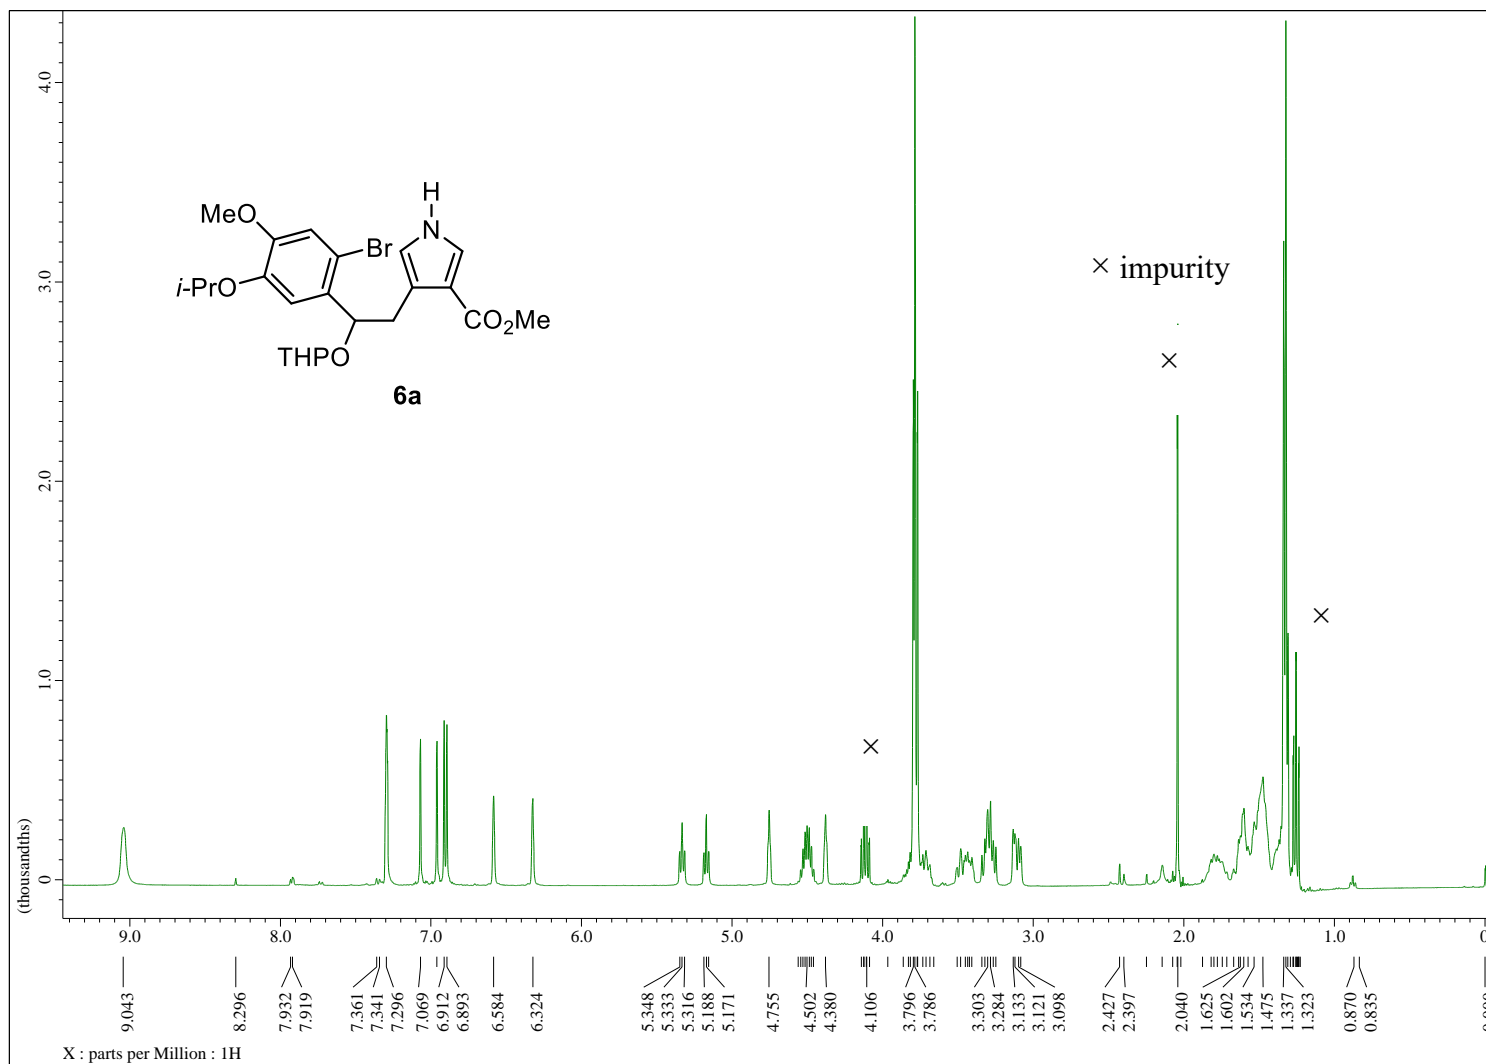

Fig. 14.  $^1\text{H}$  NMR Spectrum of Compound **6a** (300 MHz,  $\text{CDCl}_3$ )

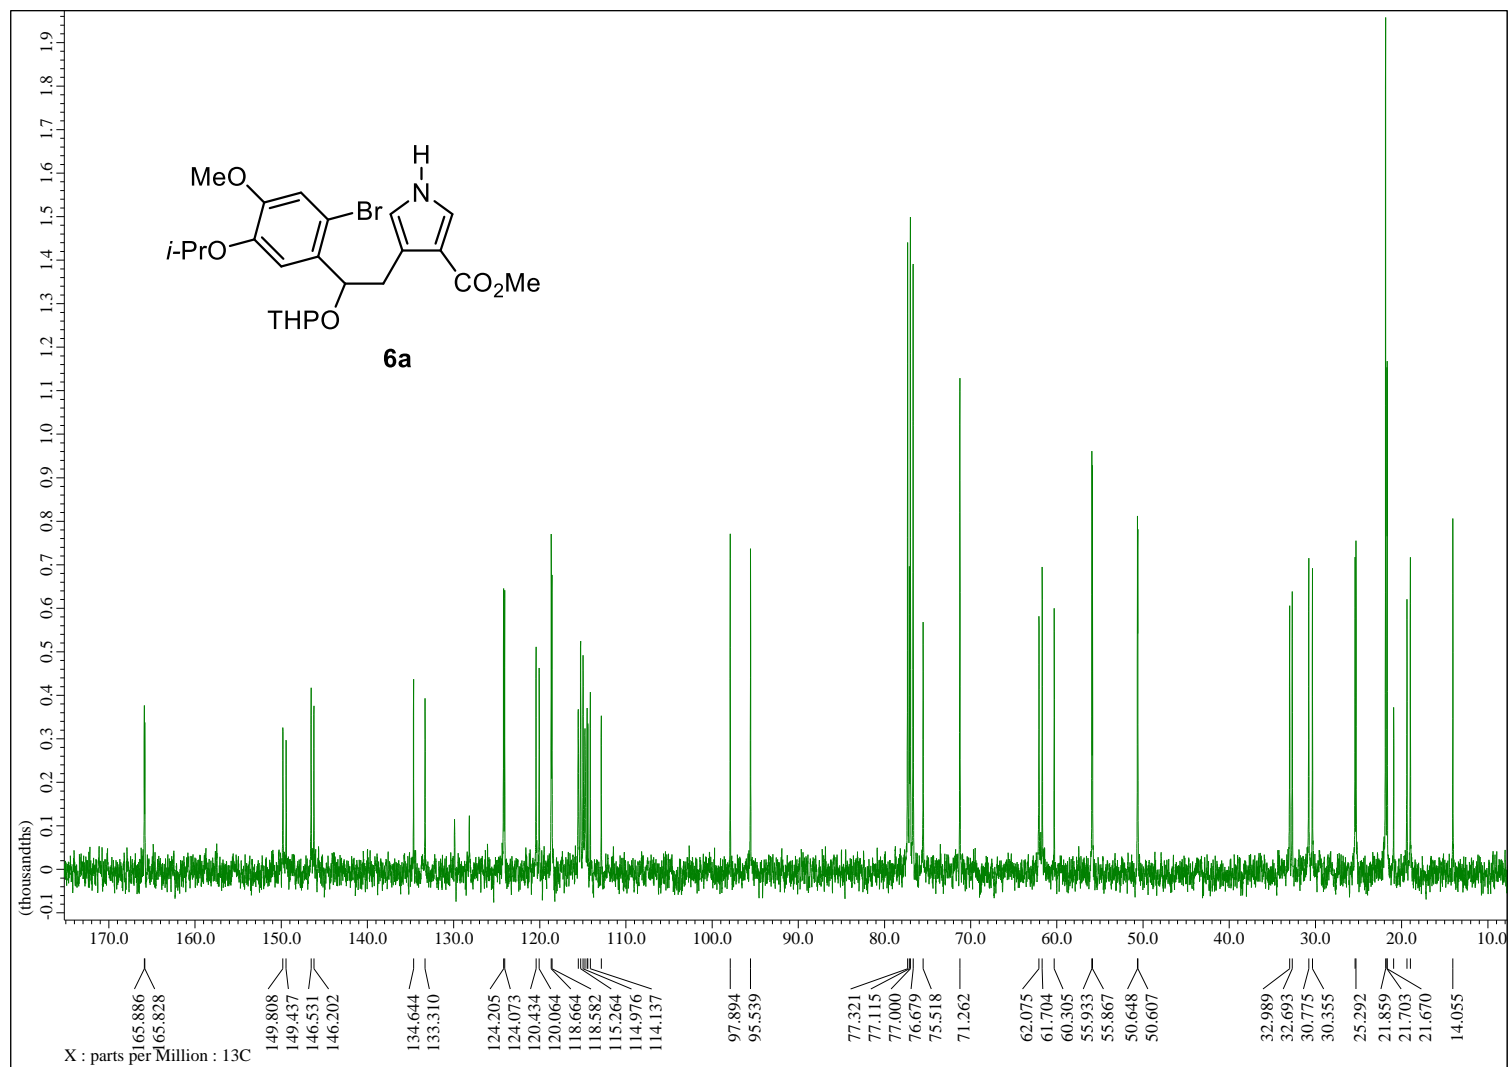

Fig. 15. <sup>13</sup>C NMR Spectrum of Compound **6a** (100 MHz, CDCl<sub>3</sub>)

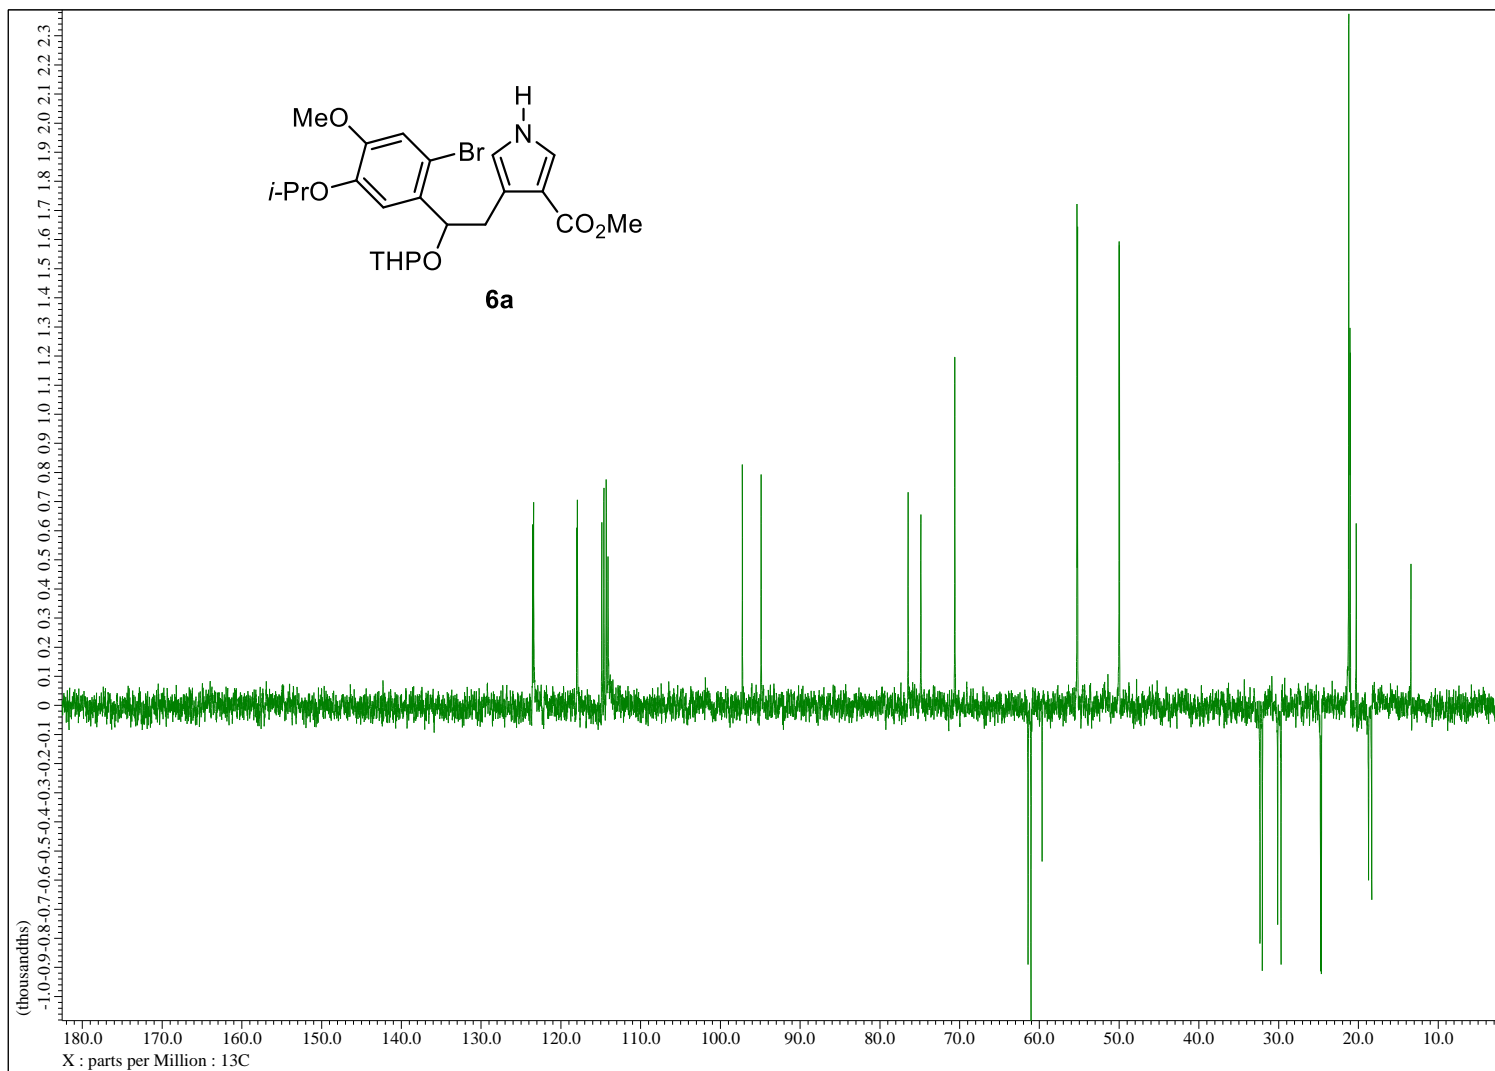

Fig. 16. DEPT Spectrum of Compound **6a**

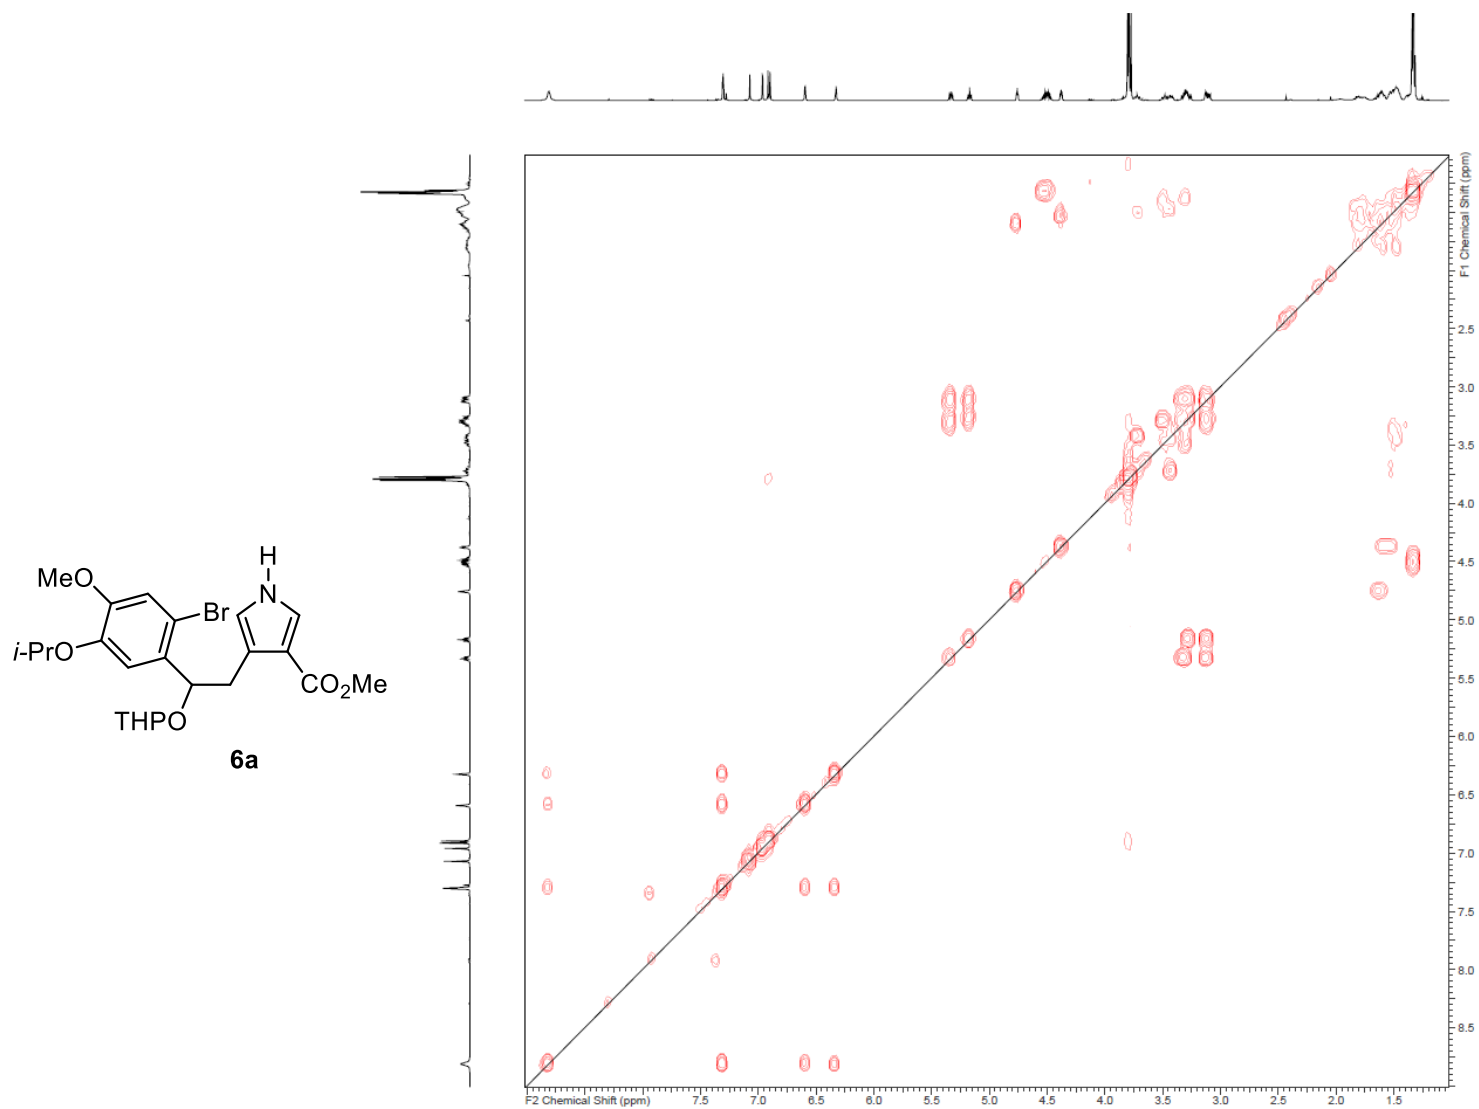

Fig. 17. COSY Spectrum of Compound **6a**

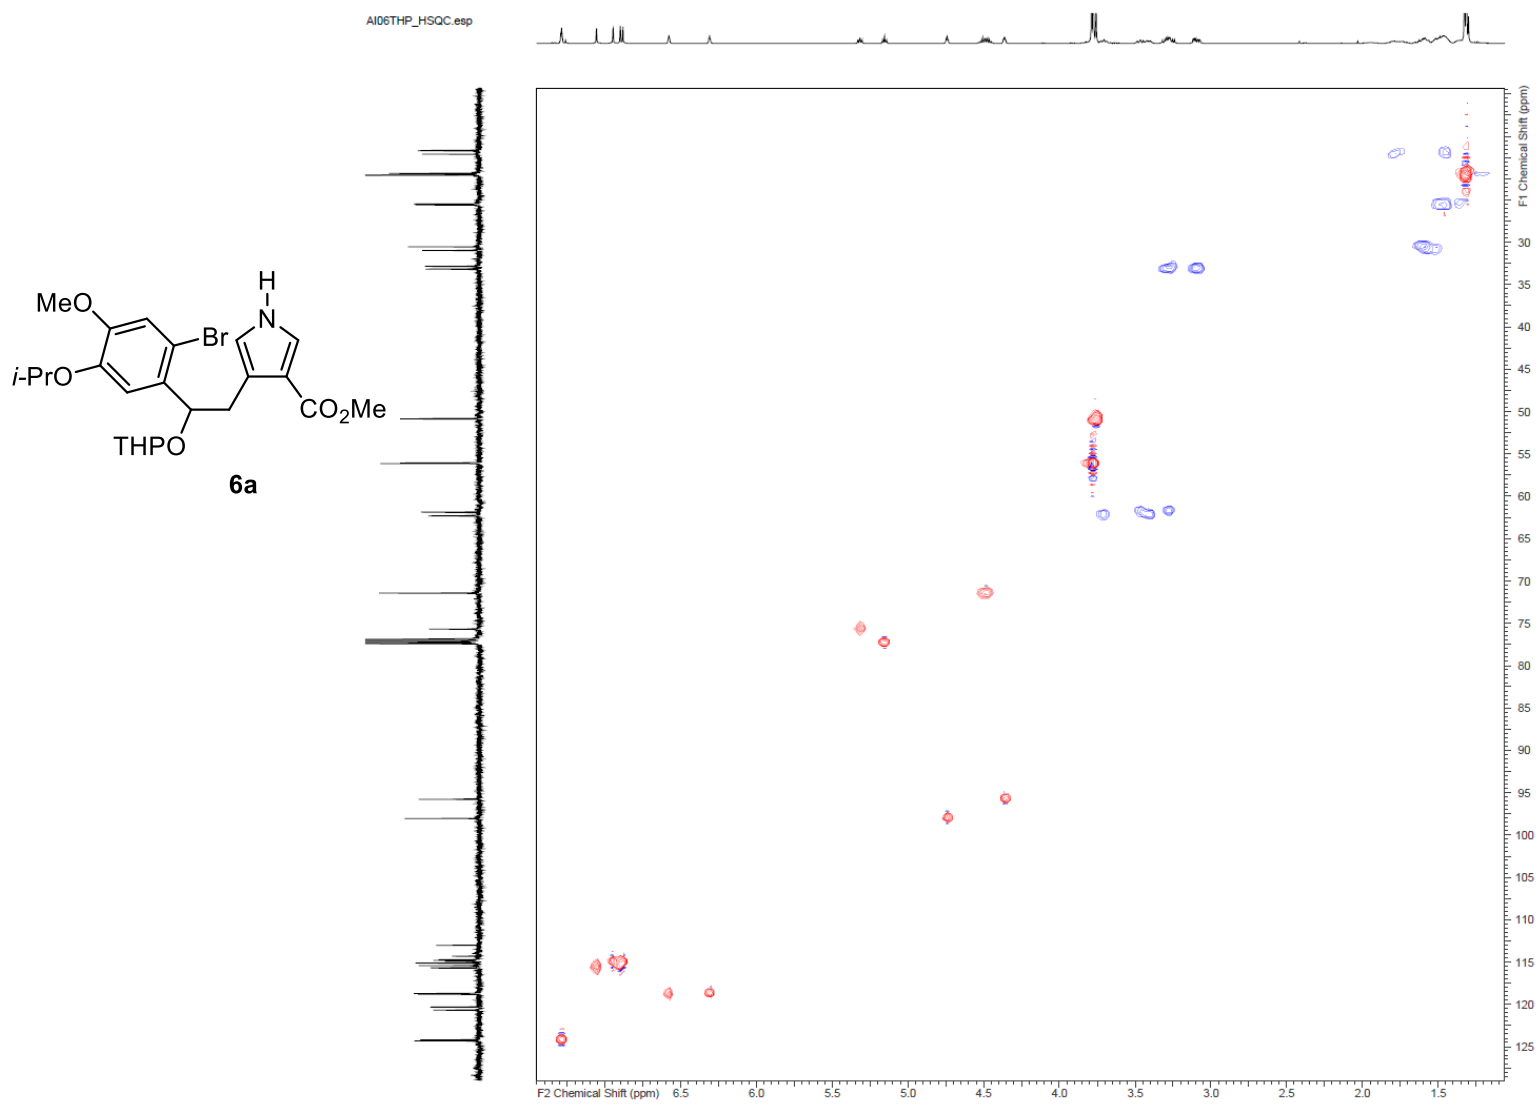

Fig. 18. HSQC Spectrum of Compound **6a**

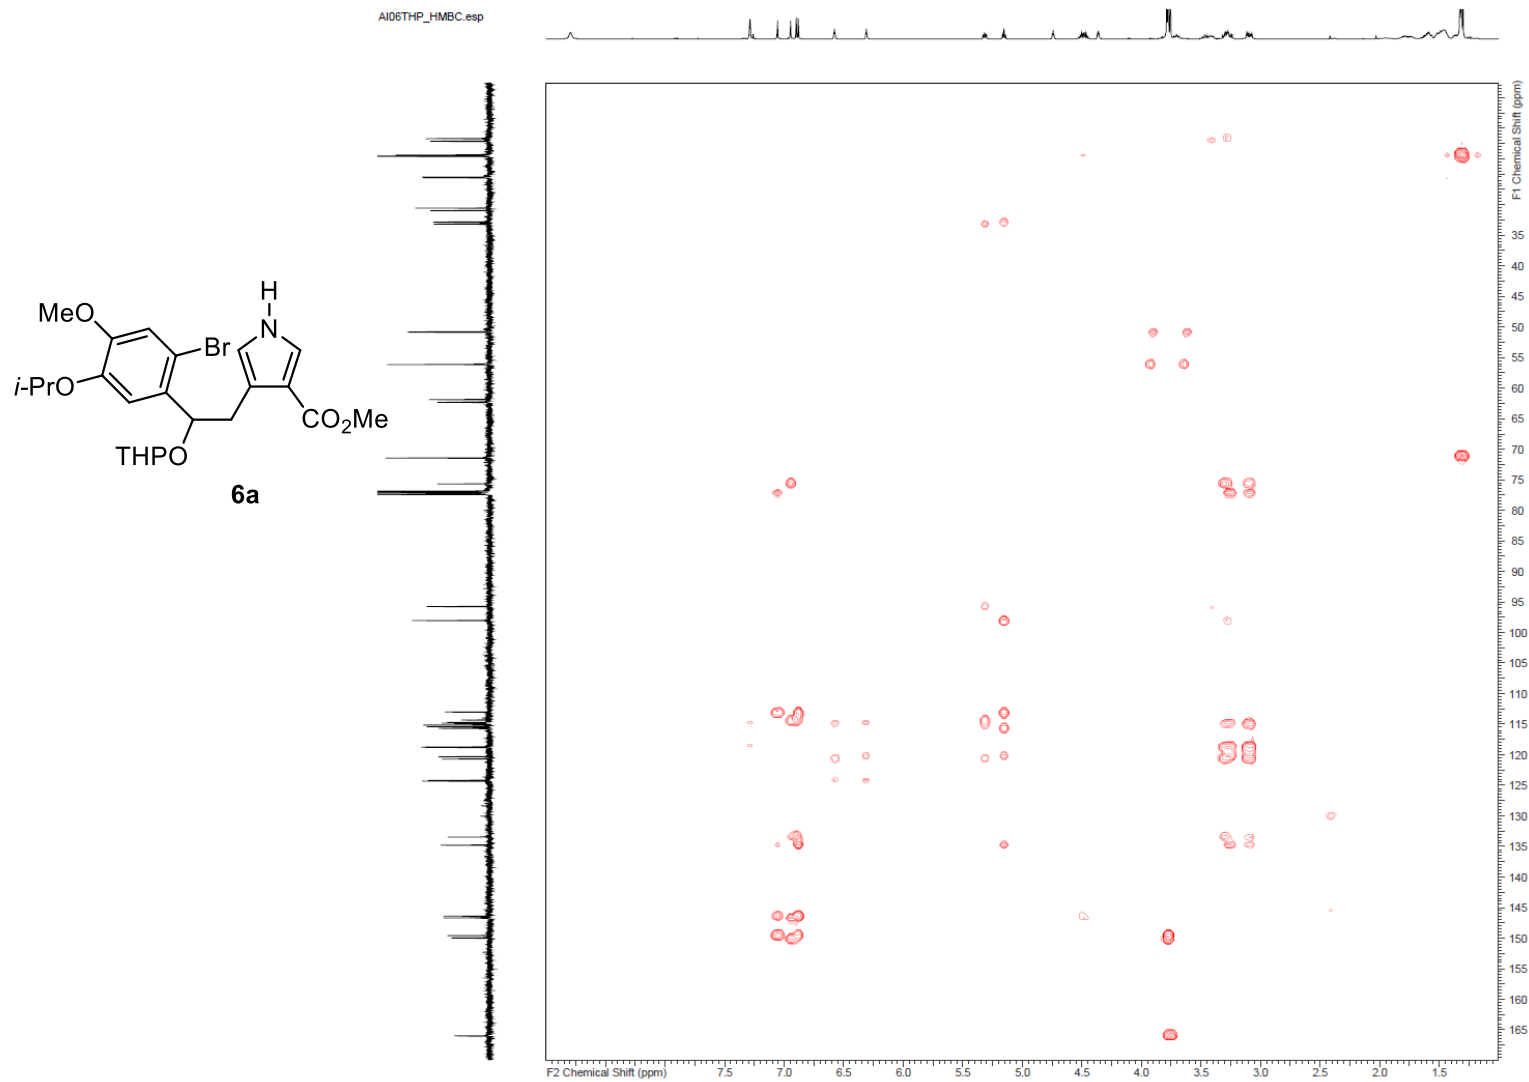Fig. 19. HMBC Spectrum of Compound **6a**

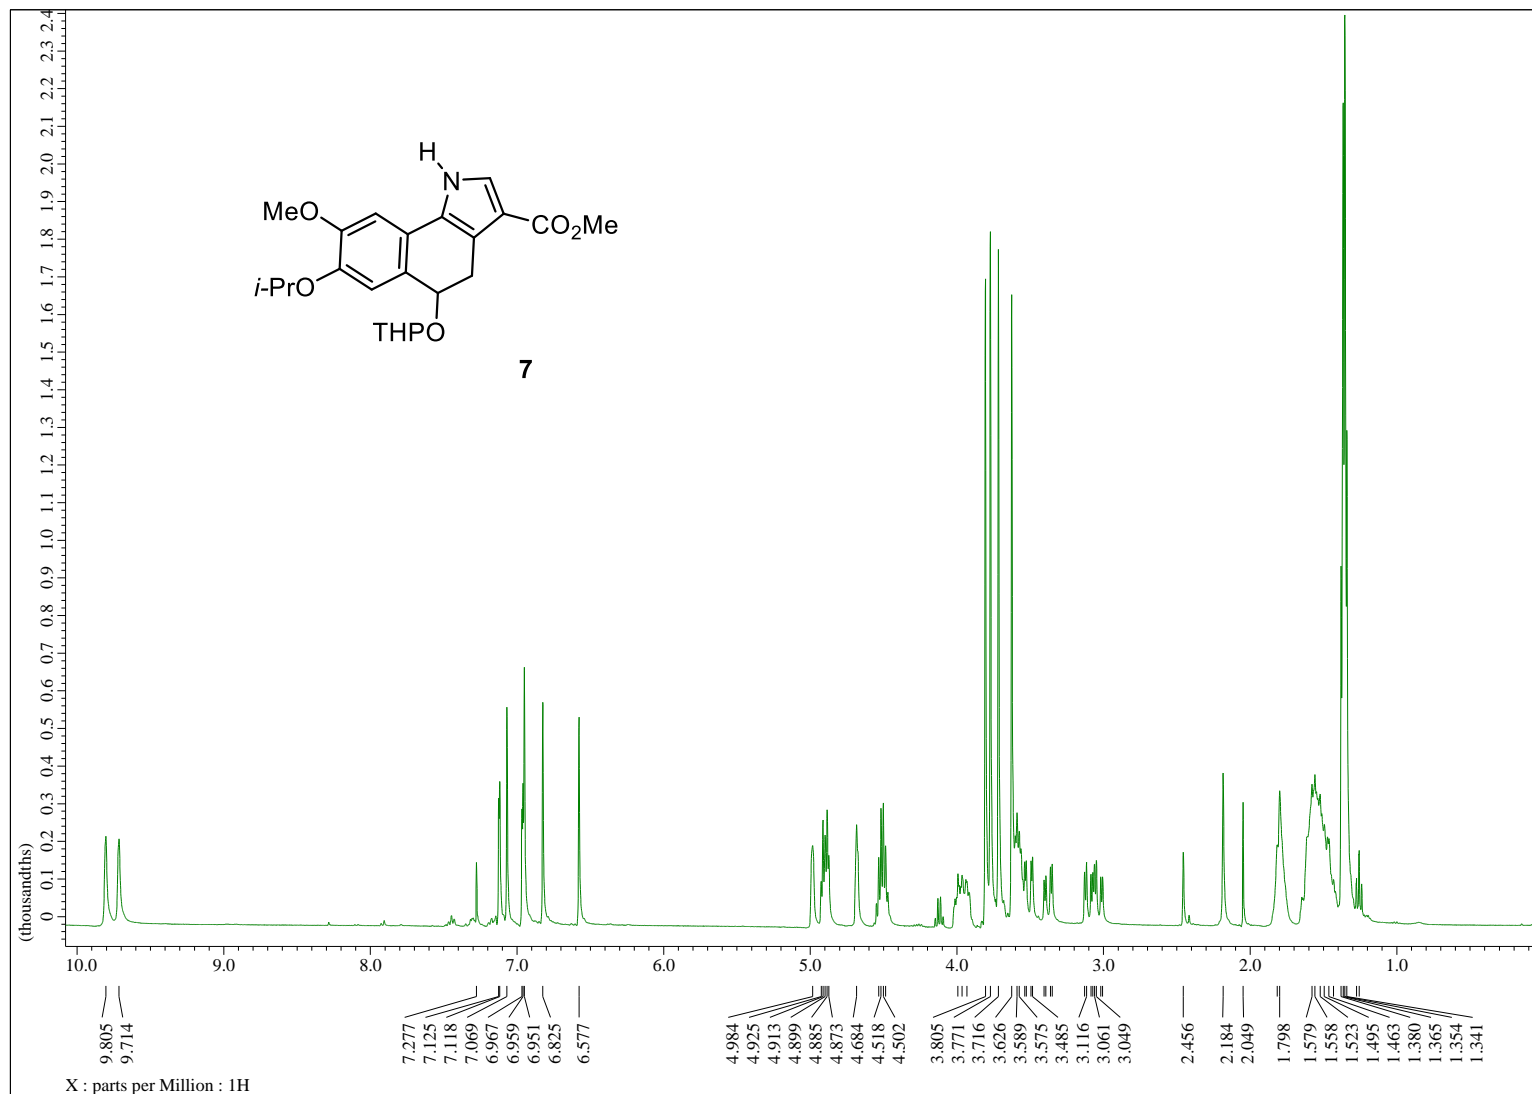

Fig. 20. <sup>1</sup>H NMR Spectrum of Compound **7** (400 MHz, CDCl<sub>3</sub>)



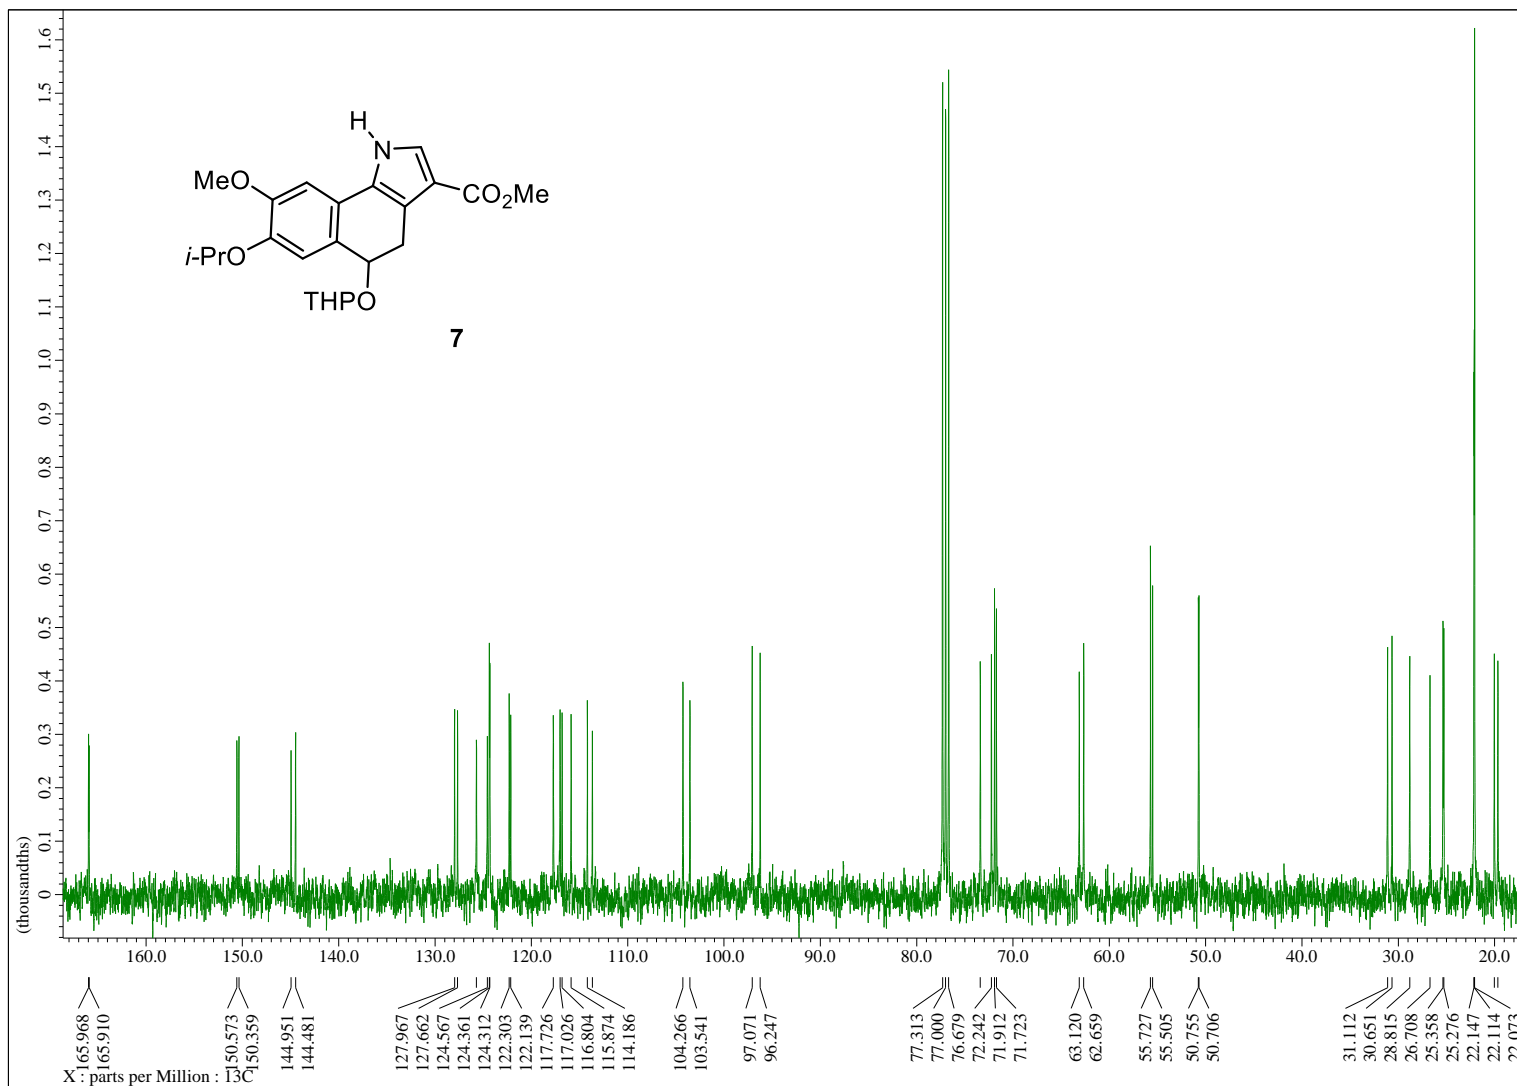

Fig. 21. <sup>13</sup>C NMR Spectrum of Compound 7 (100 MHz, CDCl<sub>3</sub>)

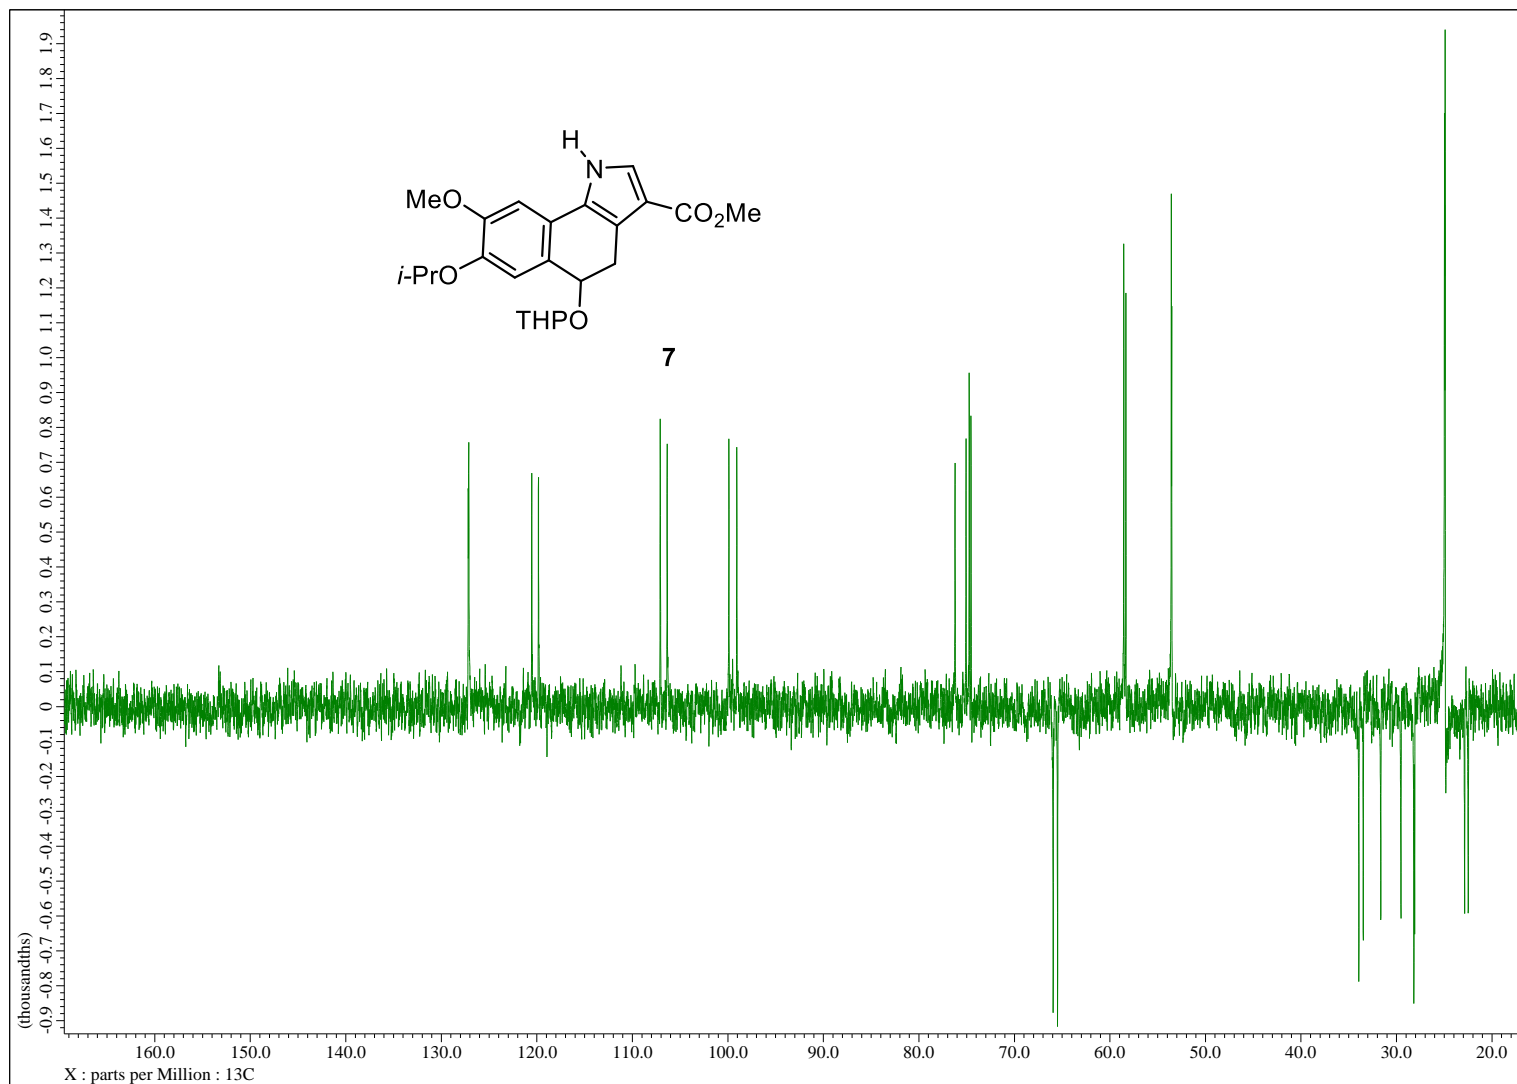

Fig. 22. DEPT Spectrum of Compound 7 (100 MHz, CDCl<sub>3</sub>)

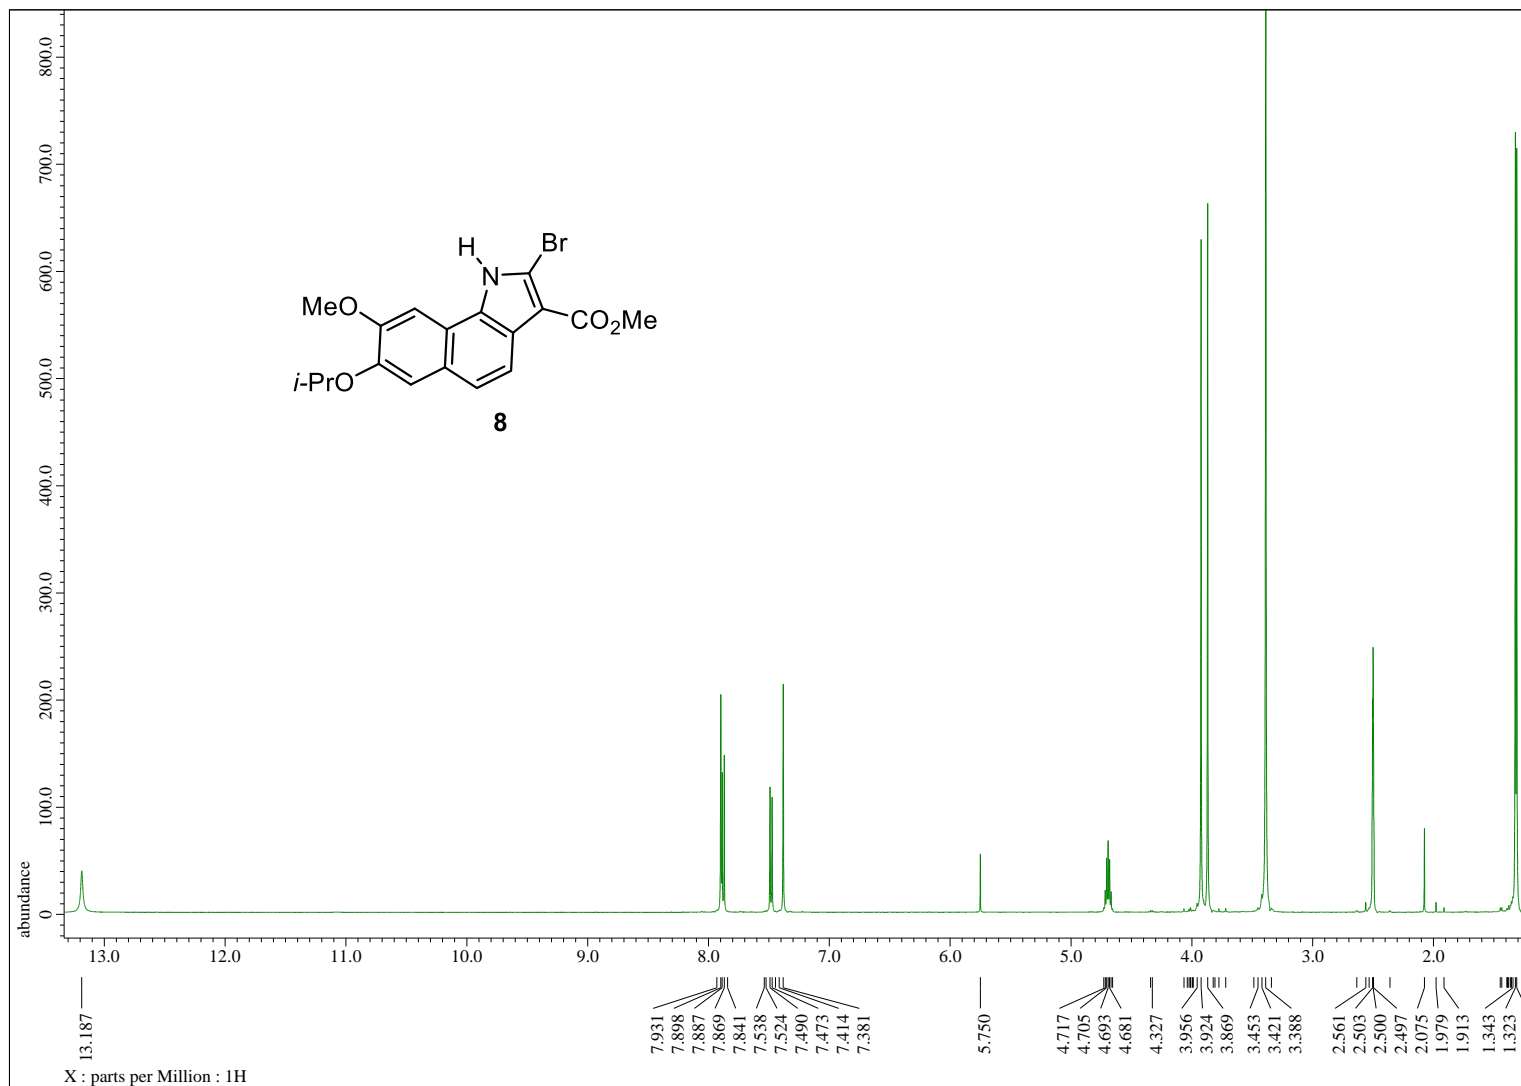

Fig. 23. <sup>1</sup>H NMR Spectrum of Compound **8** (500 MHz, DMSO-*d*<sub>6</sub>)



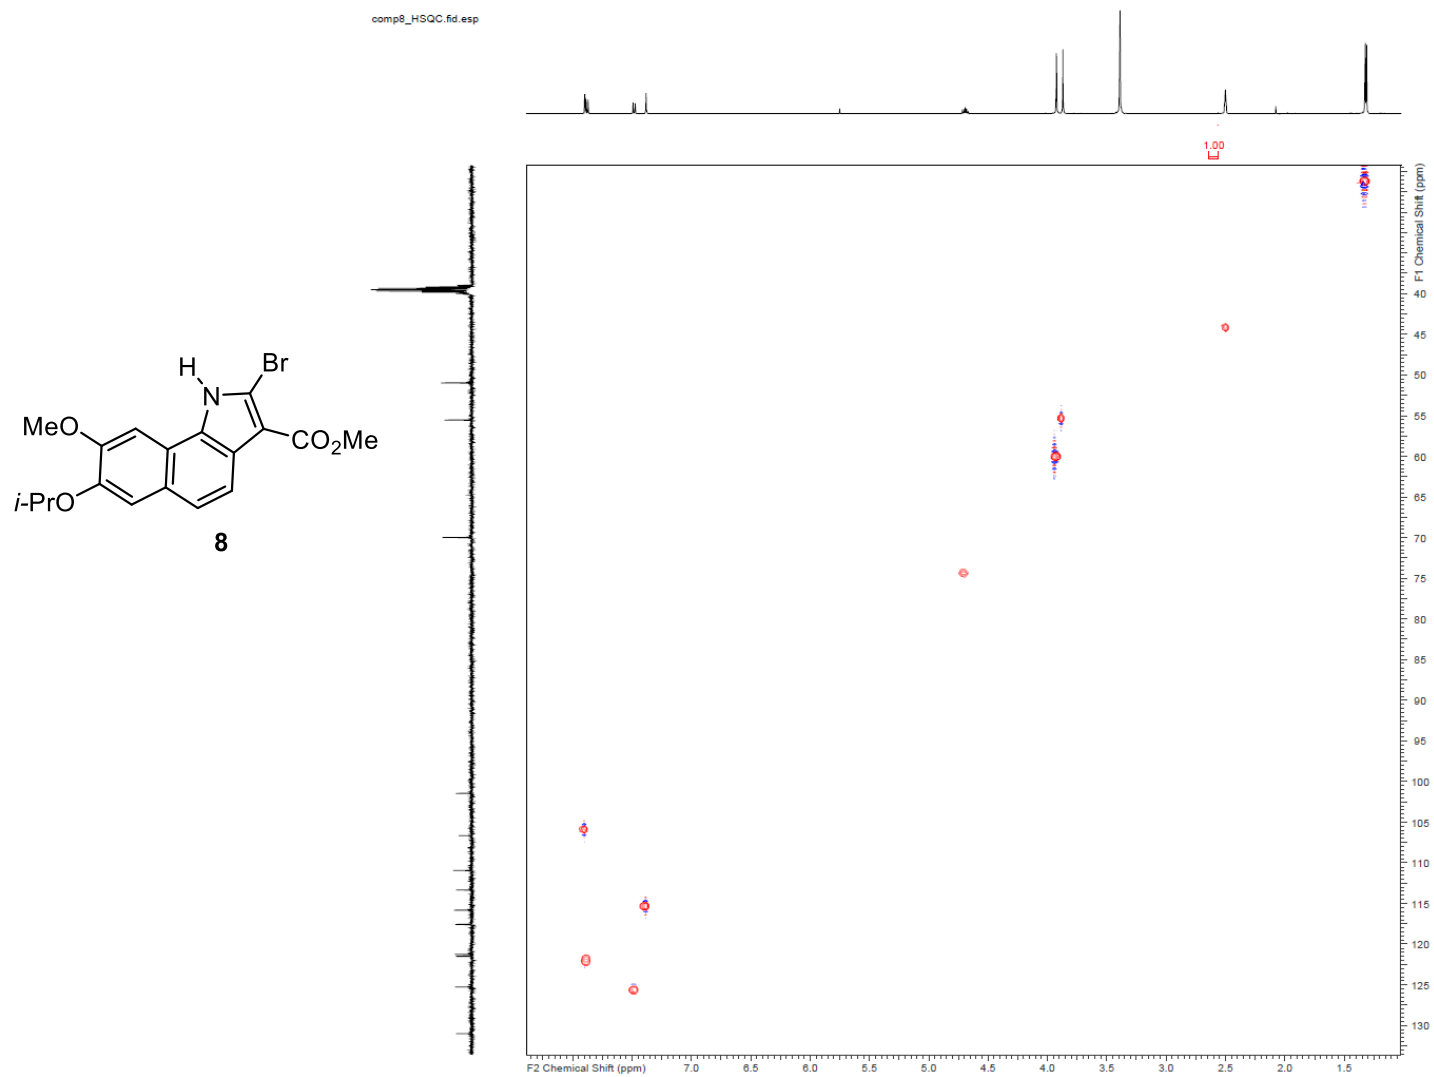Fig. 25. HSQC Spectrum of Compound **8** (DMSO- $d_6$ )

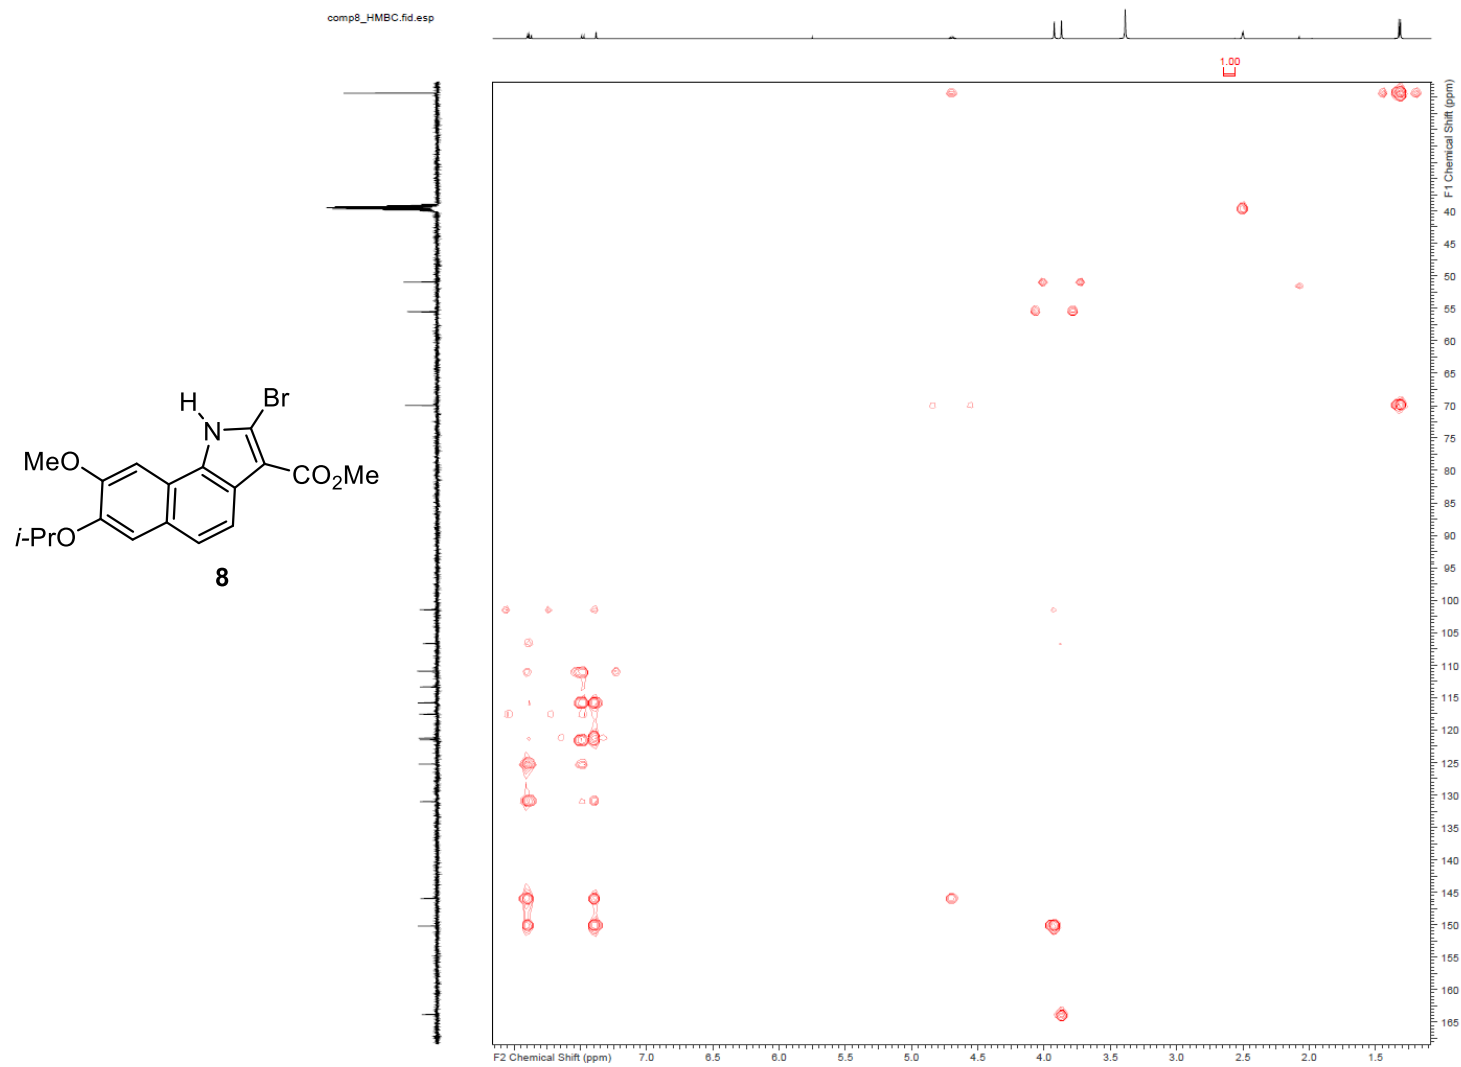

Fig. 26. HMBC Spectrum of Compound **8** (DMSO- $d_6$ )

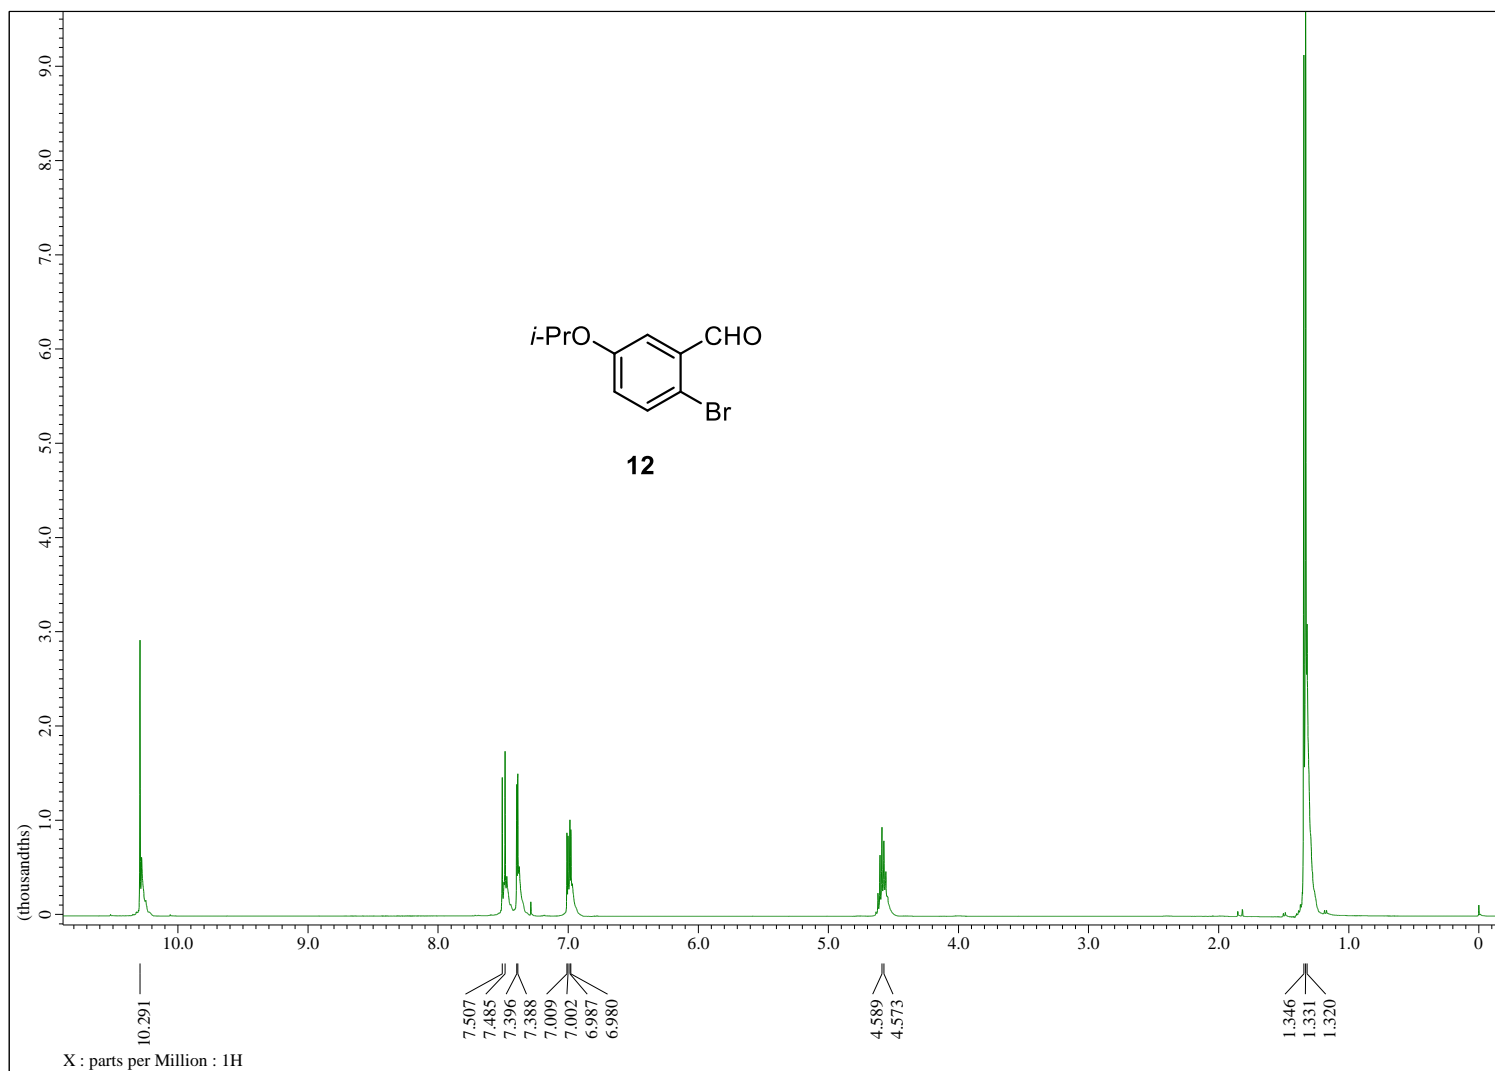

Fig. 27.  $^1\text{H}$  NMR Spectrum of Compound **12** (400 MHz,  $\text{CDCl}_3$ )

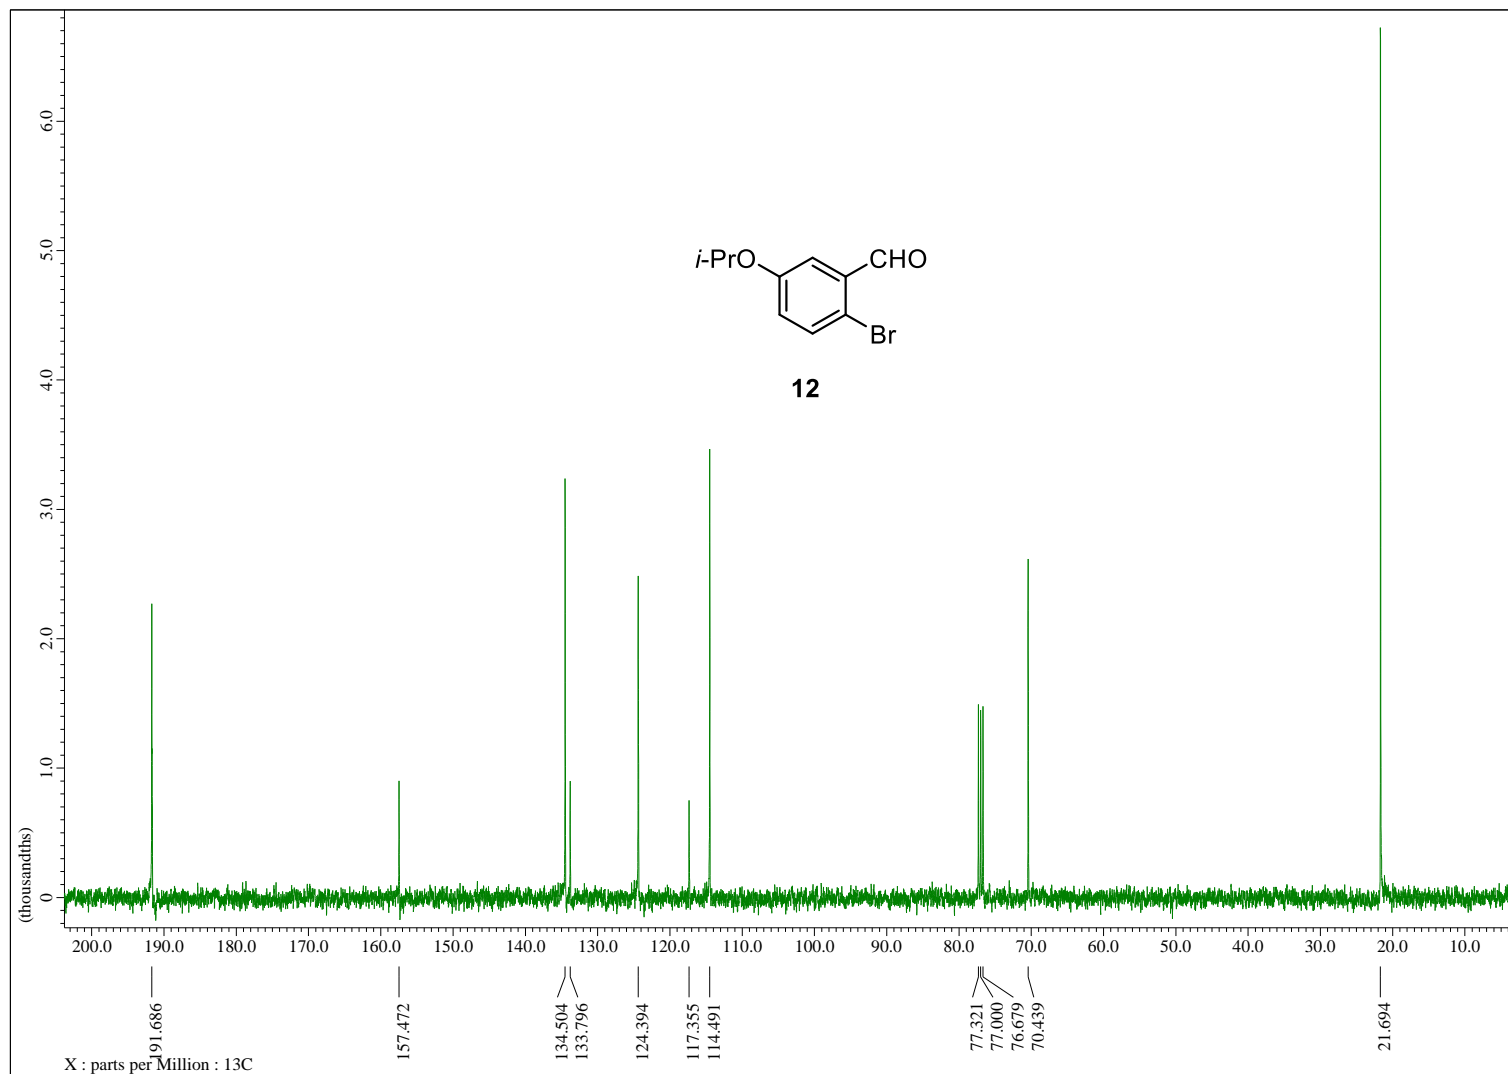

Fig. 28.  $^{13}\text{C}$  NMR Spectrum of Compound **12** (100 MHz,  $\text{CDCl}_3$ )



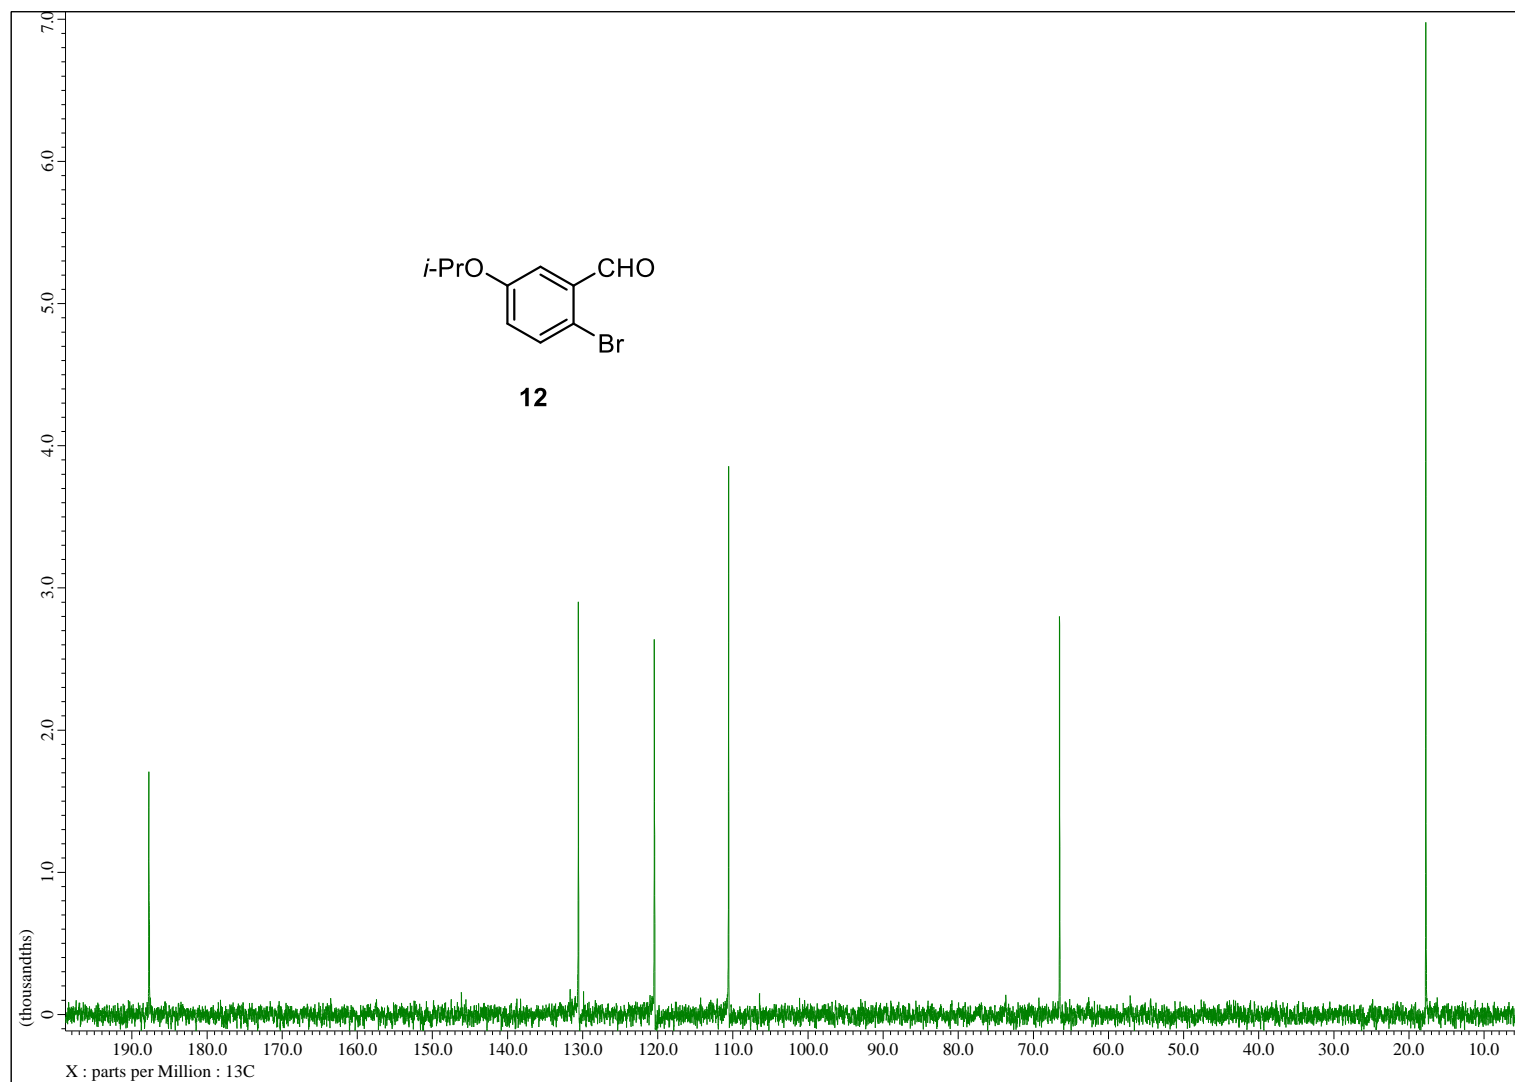

Fig. 29. DEPT Spectrum of Compound **12**

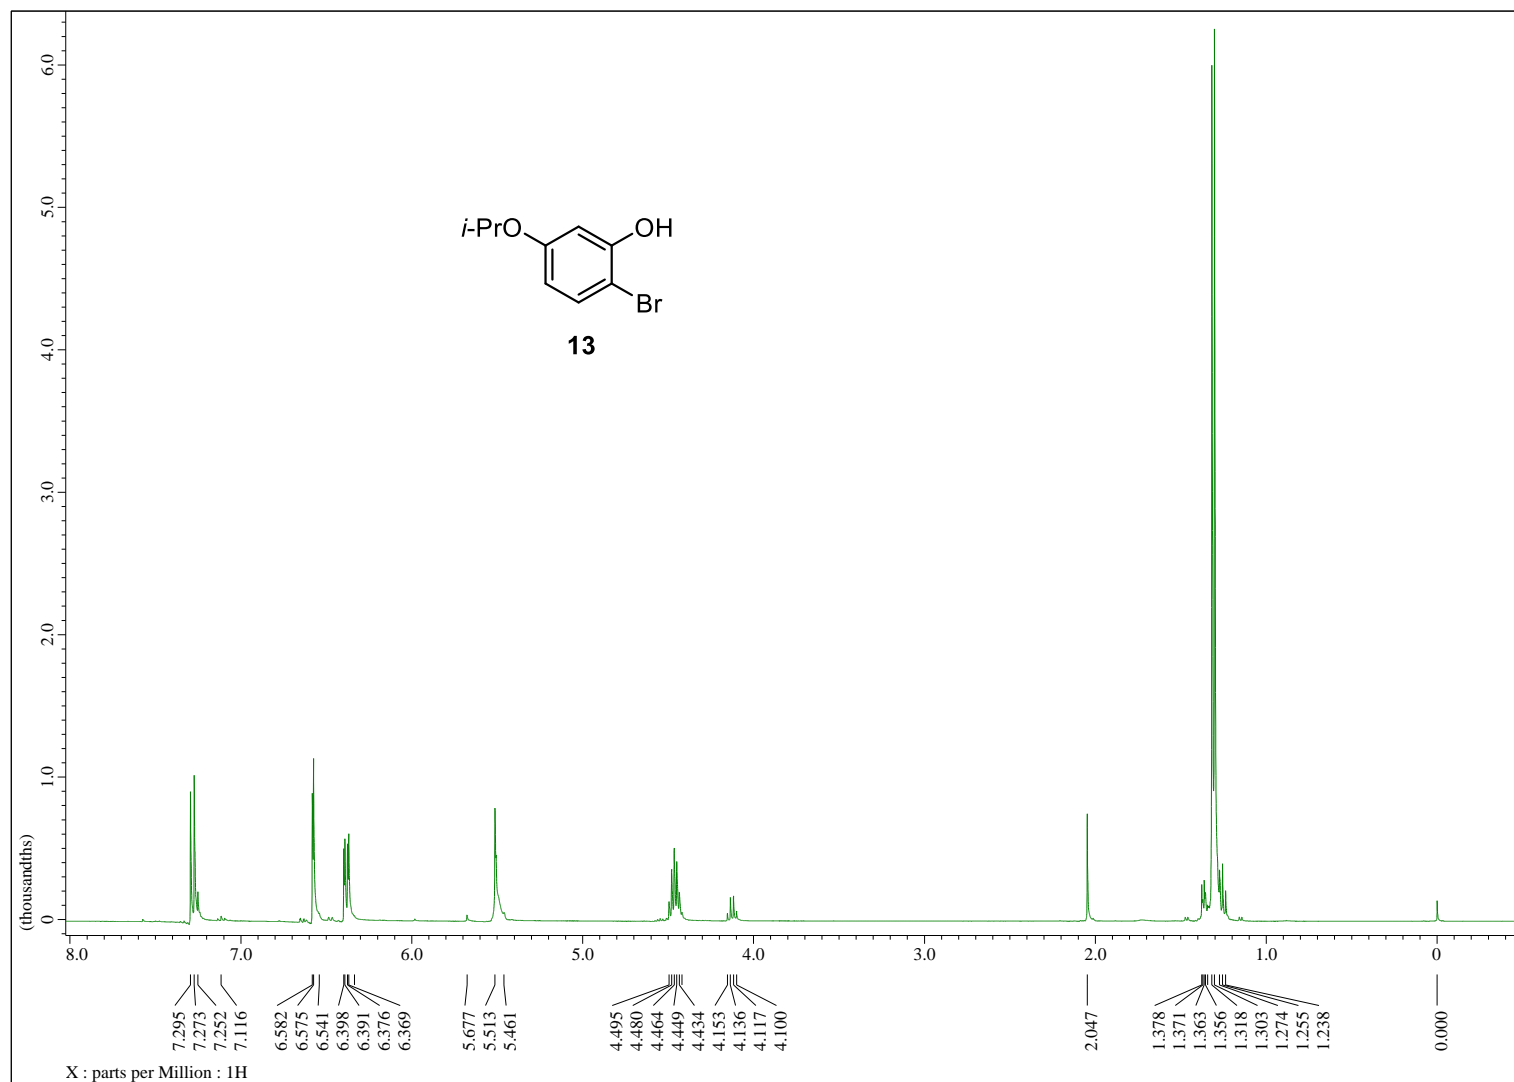

Fig. 30. <sup>1</sup>H NMR Spectrum of Compound **13** (400 MHz, CDCl<sub>3</sub>)

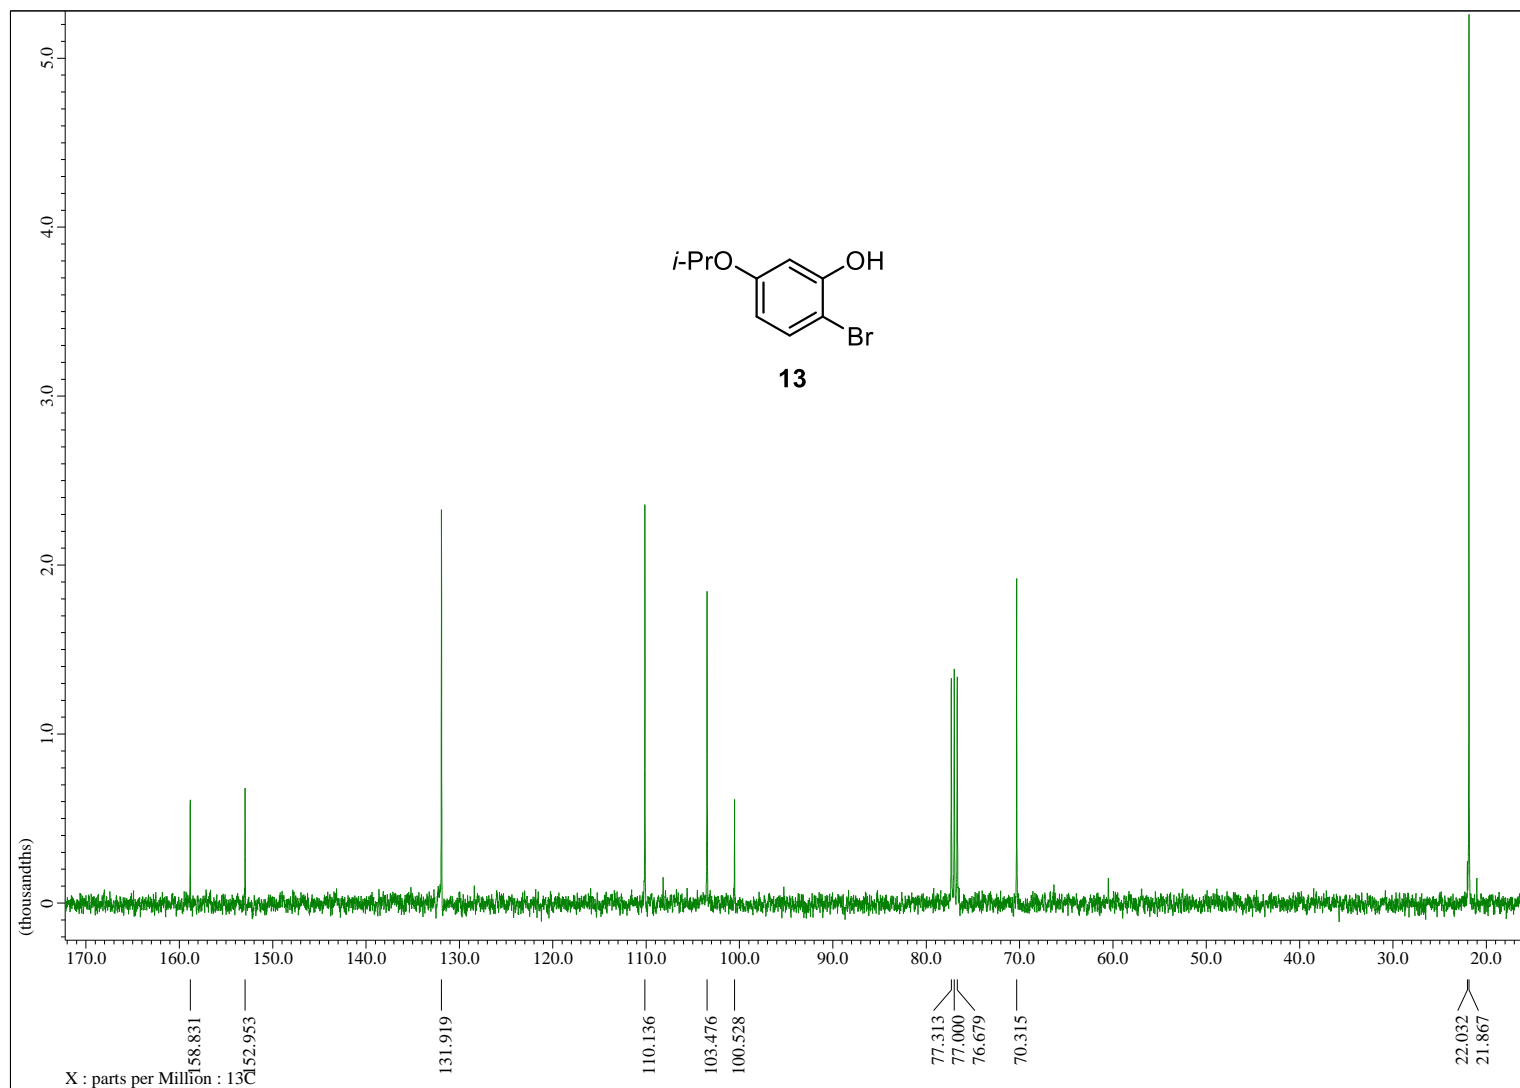

Fig. 31.  $^{13}\text{C}$  NMR Spectrum of Compound **13** (100 MHz,  $\text{CDCl}_3$ )

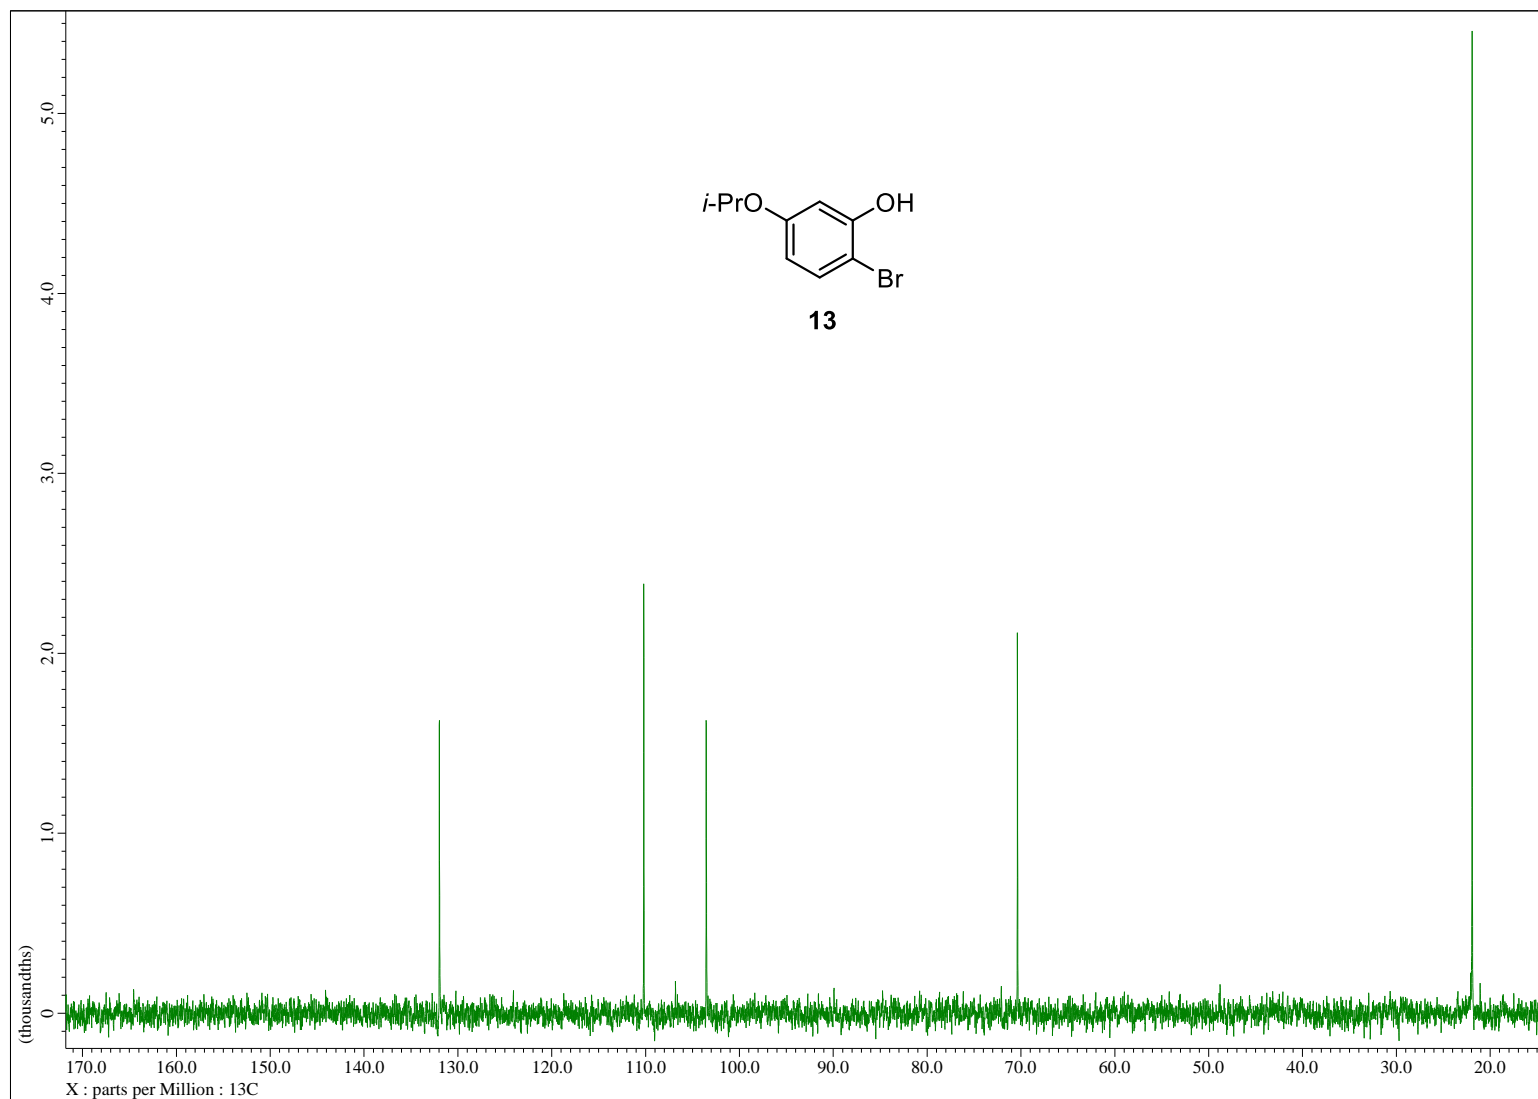

Fig. 32. DEPT Spectrum of Compound 13

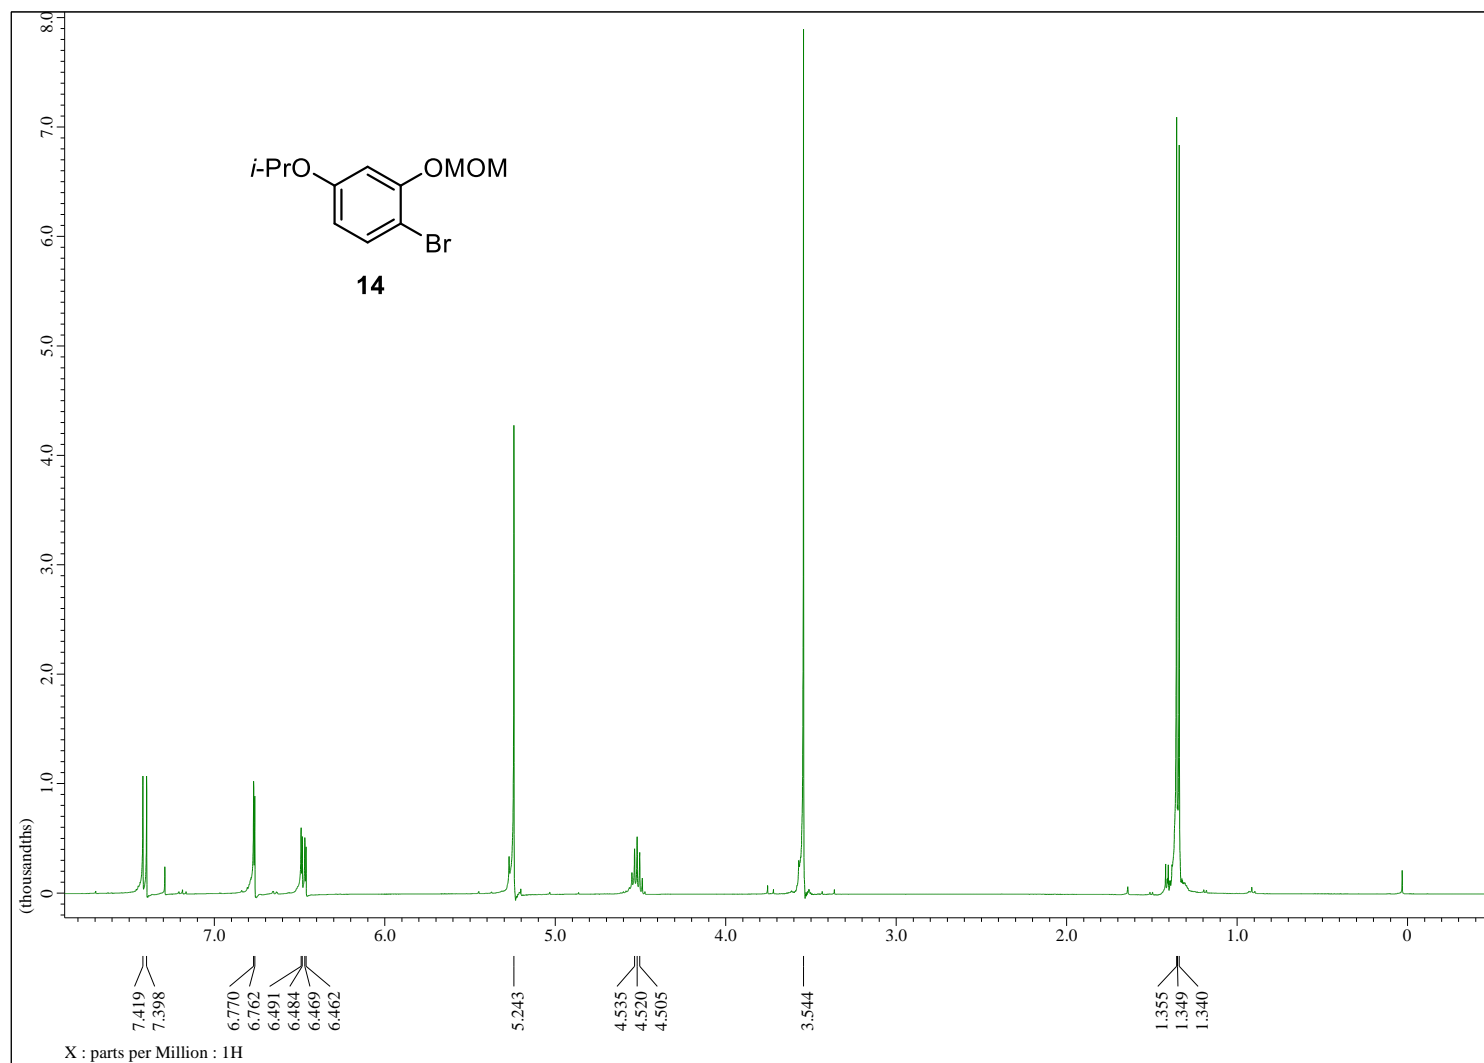

Fig. 33.  $^1\text{H}$  NMR Spectrum of Compound **14** (400 MHz,  $\text{CDCl}_3$ )

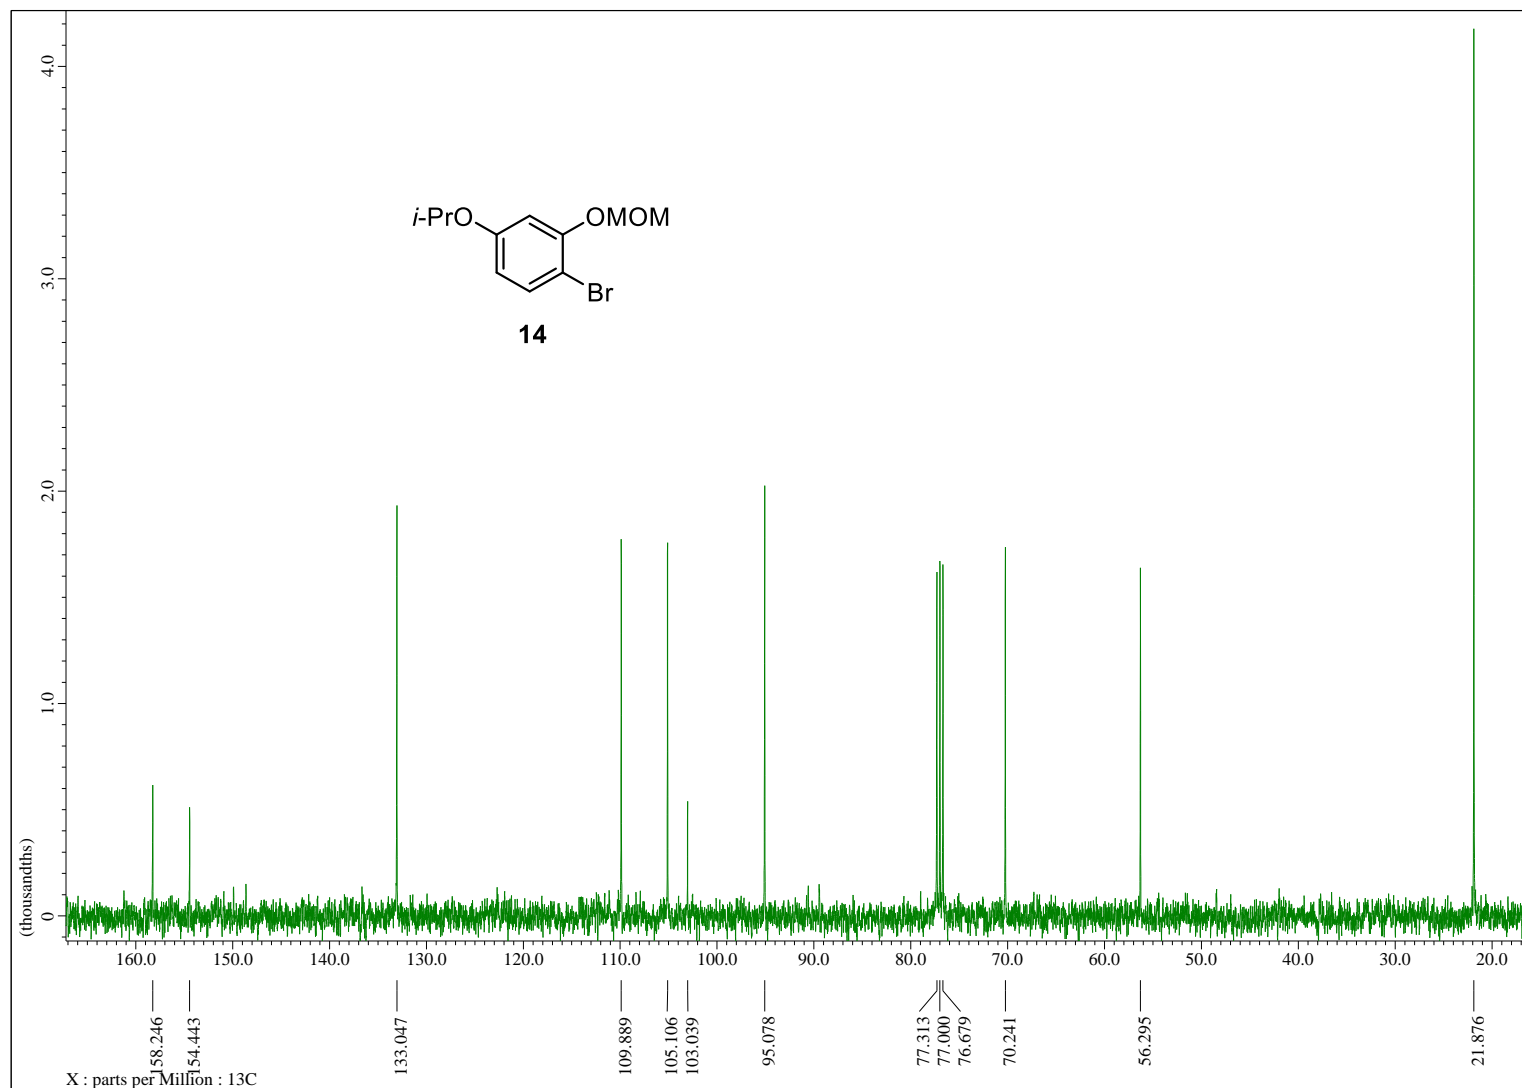

Fig. 34.  $^{13}\text{C}$  NMR Spectrum of Compound **14** (100 MHz,  $\text{CDCl}_3$ )

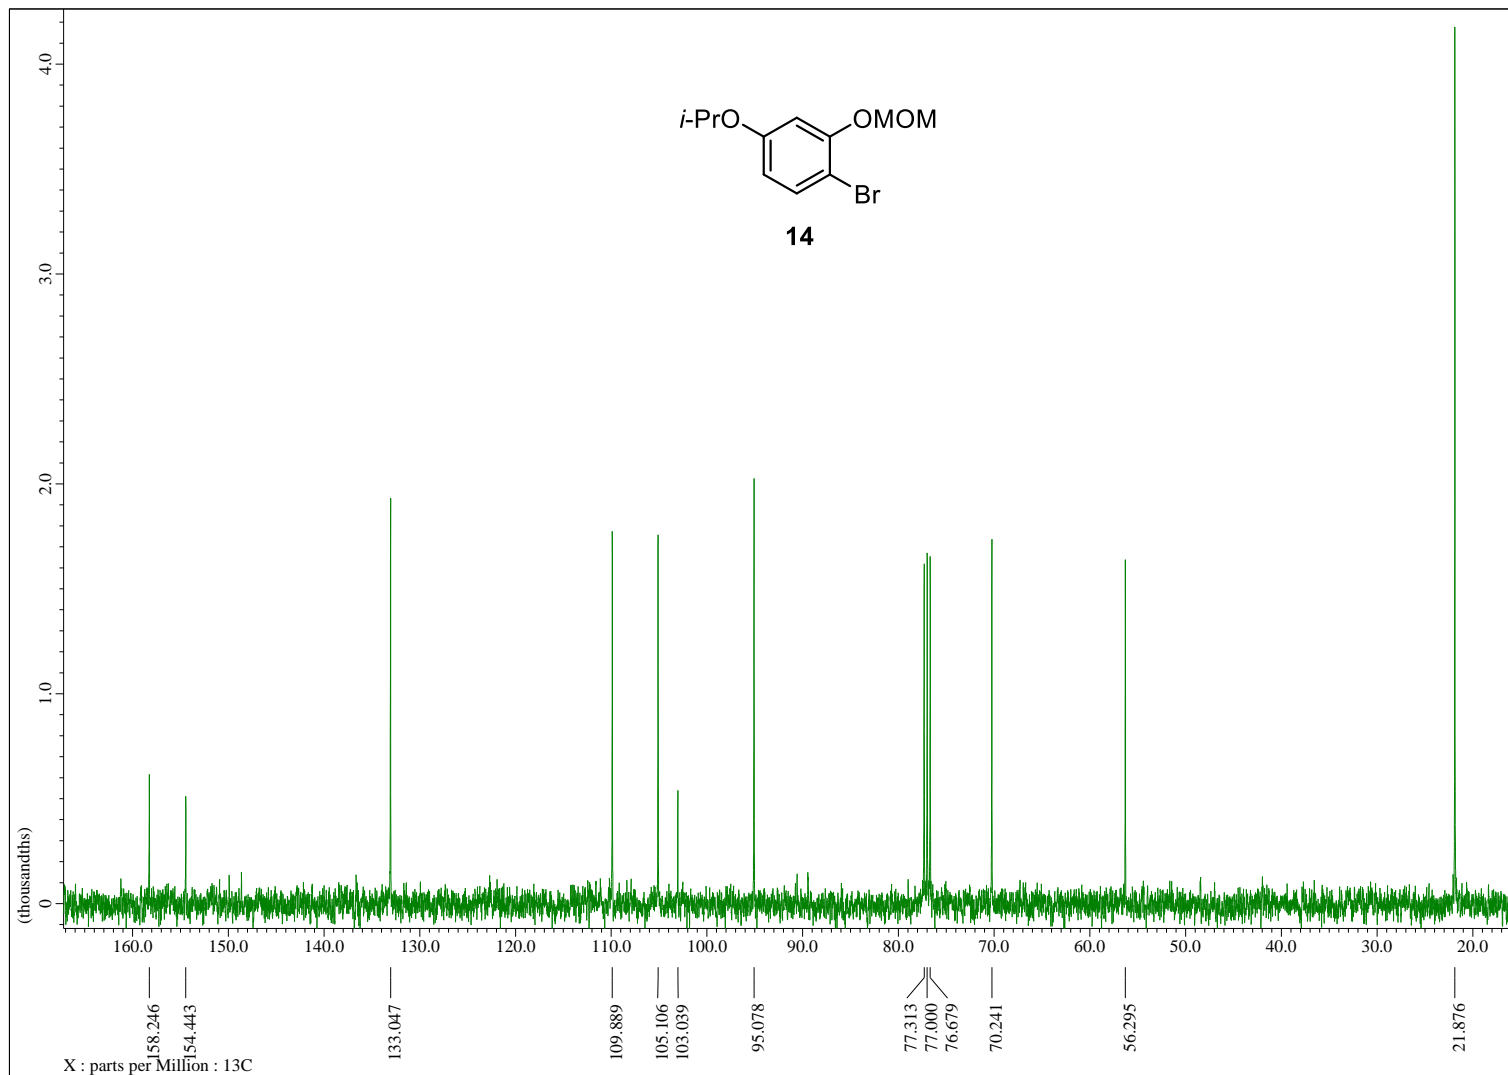

Fig. 35. DEPT Spectrum of Compound 14

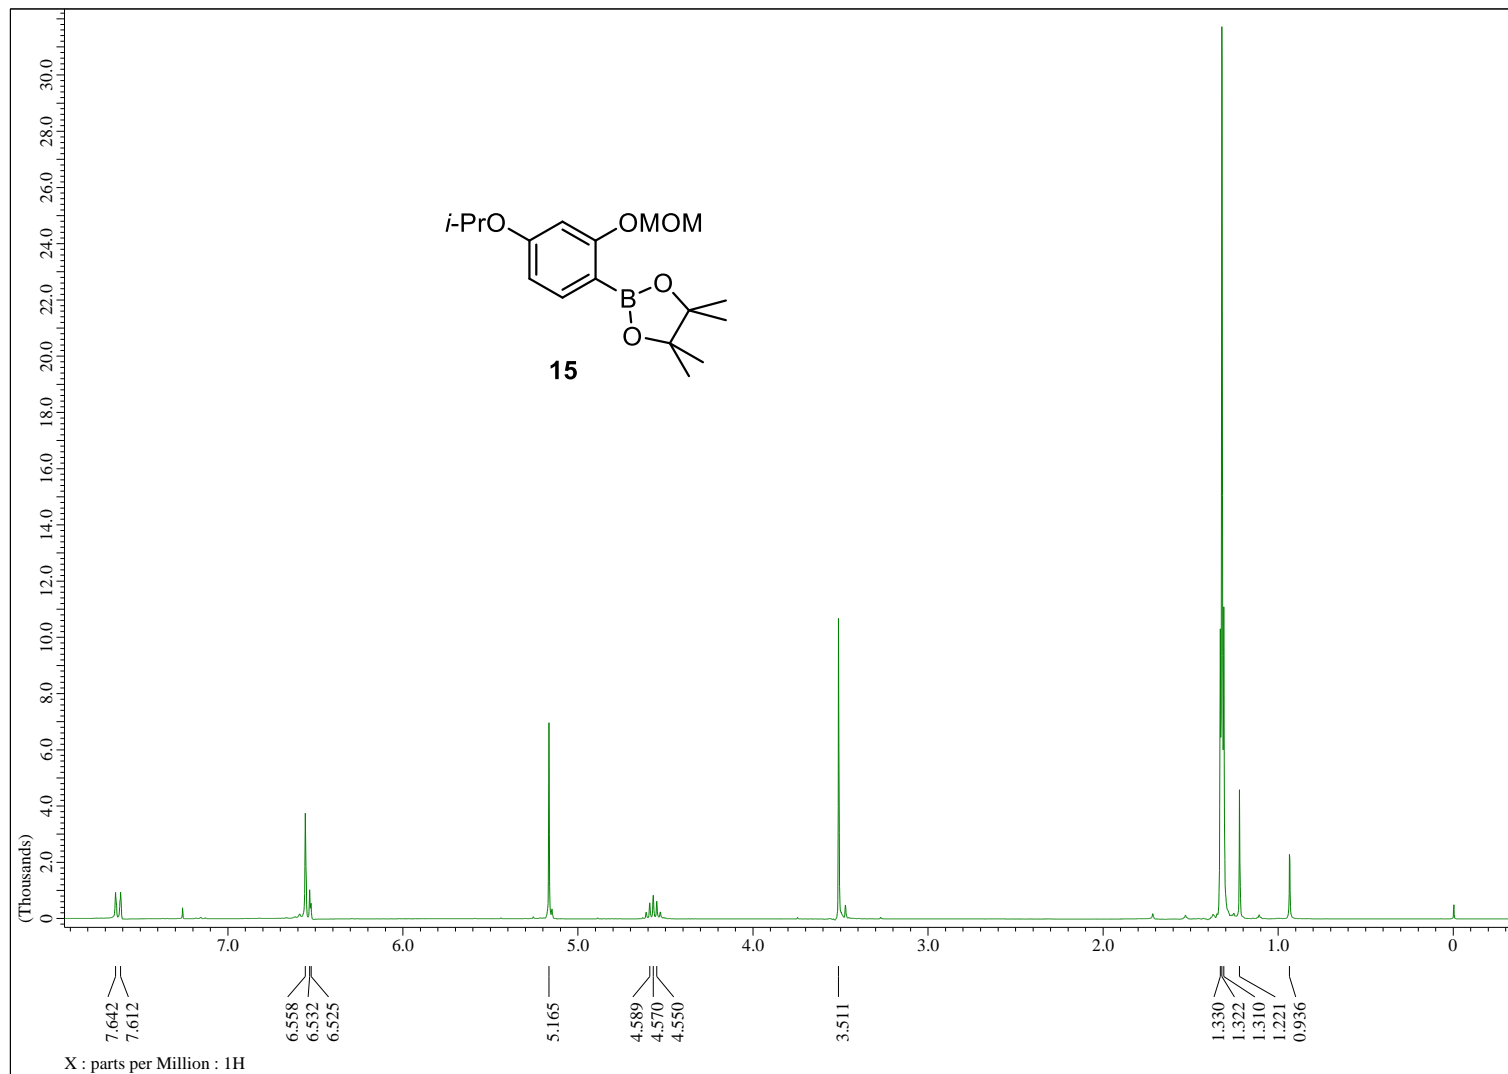

Fig. 36. <sup>1</sup>H NMR Spectrum of Compound **15** (300 MHz, CDCl<sub>3</sub>)



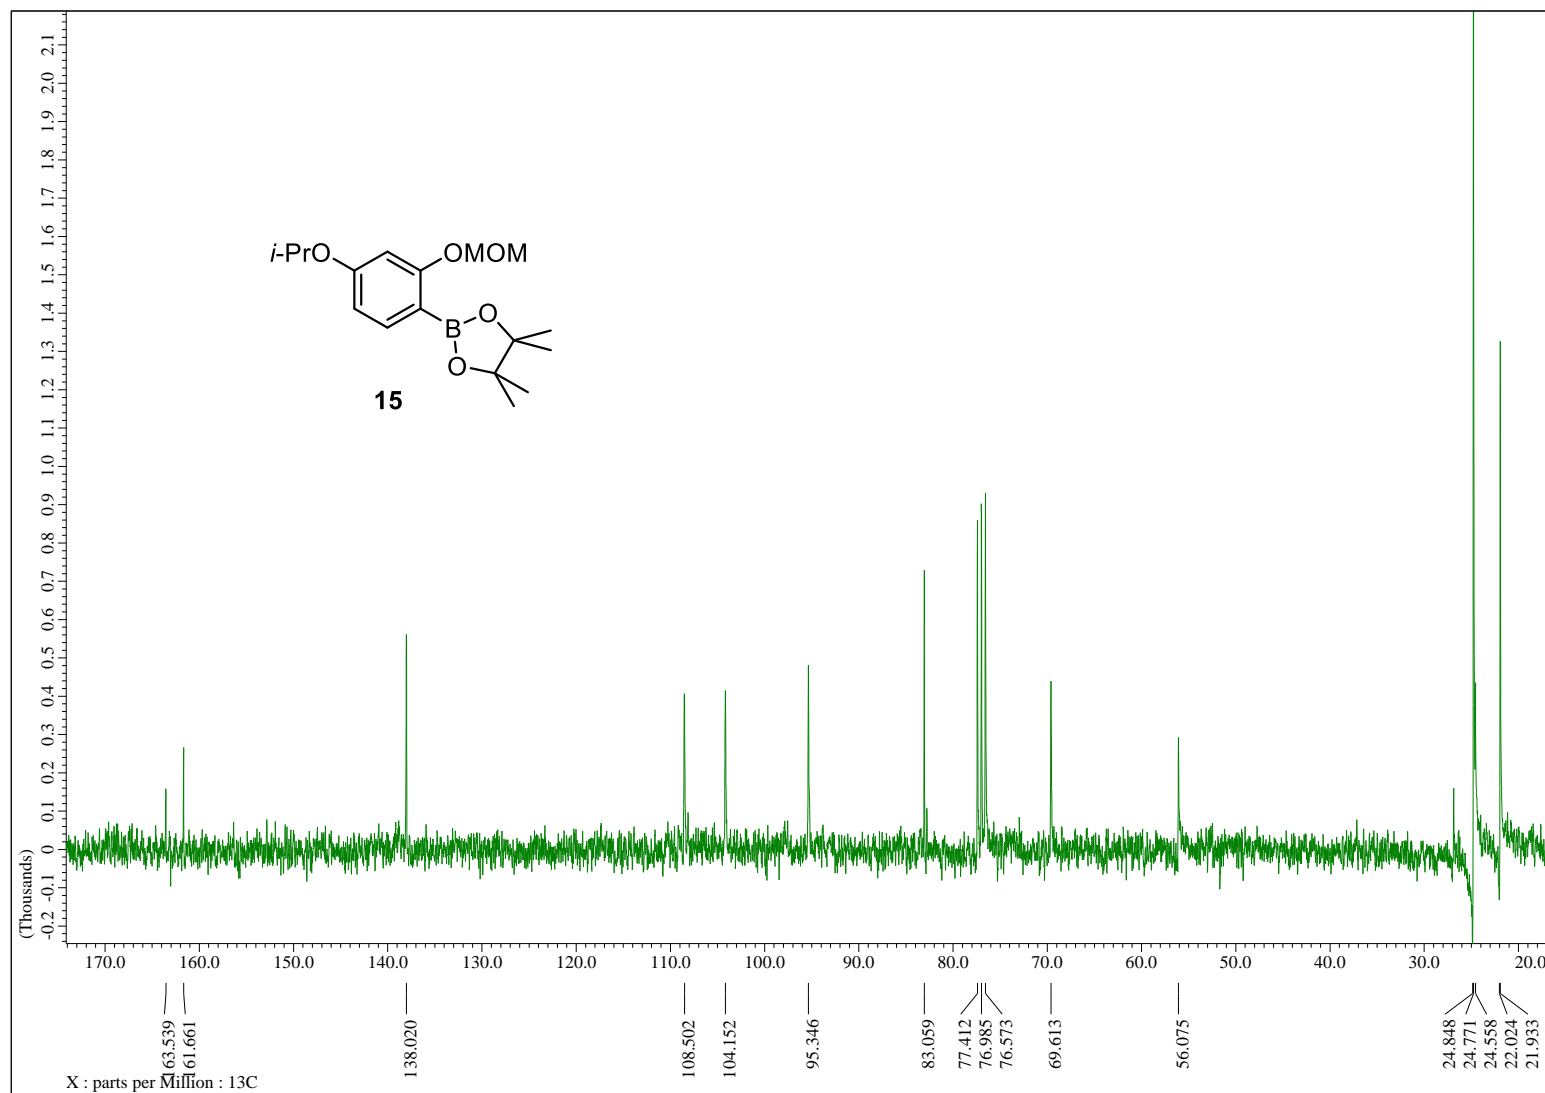

Fig. 37.  $^{13}\text{C}$  NMR Spectrum of Compound **15** (75 MHz,  $\text{CDCl}_3$ )

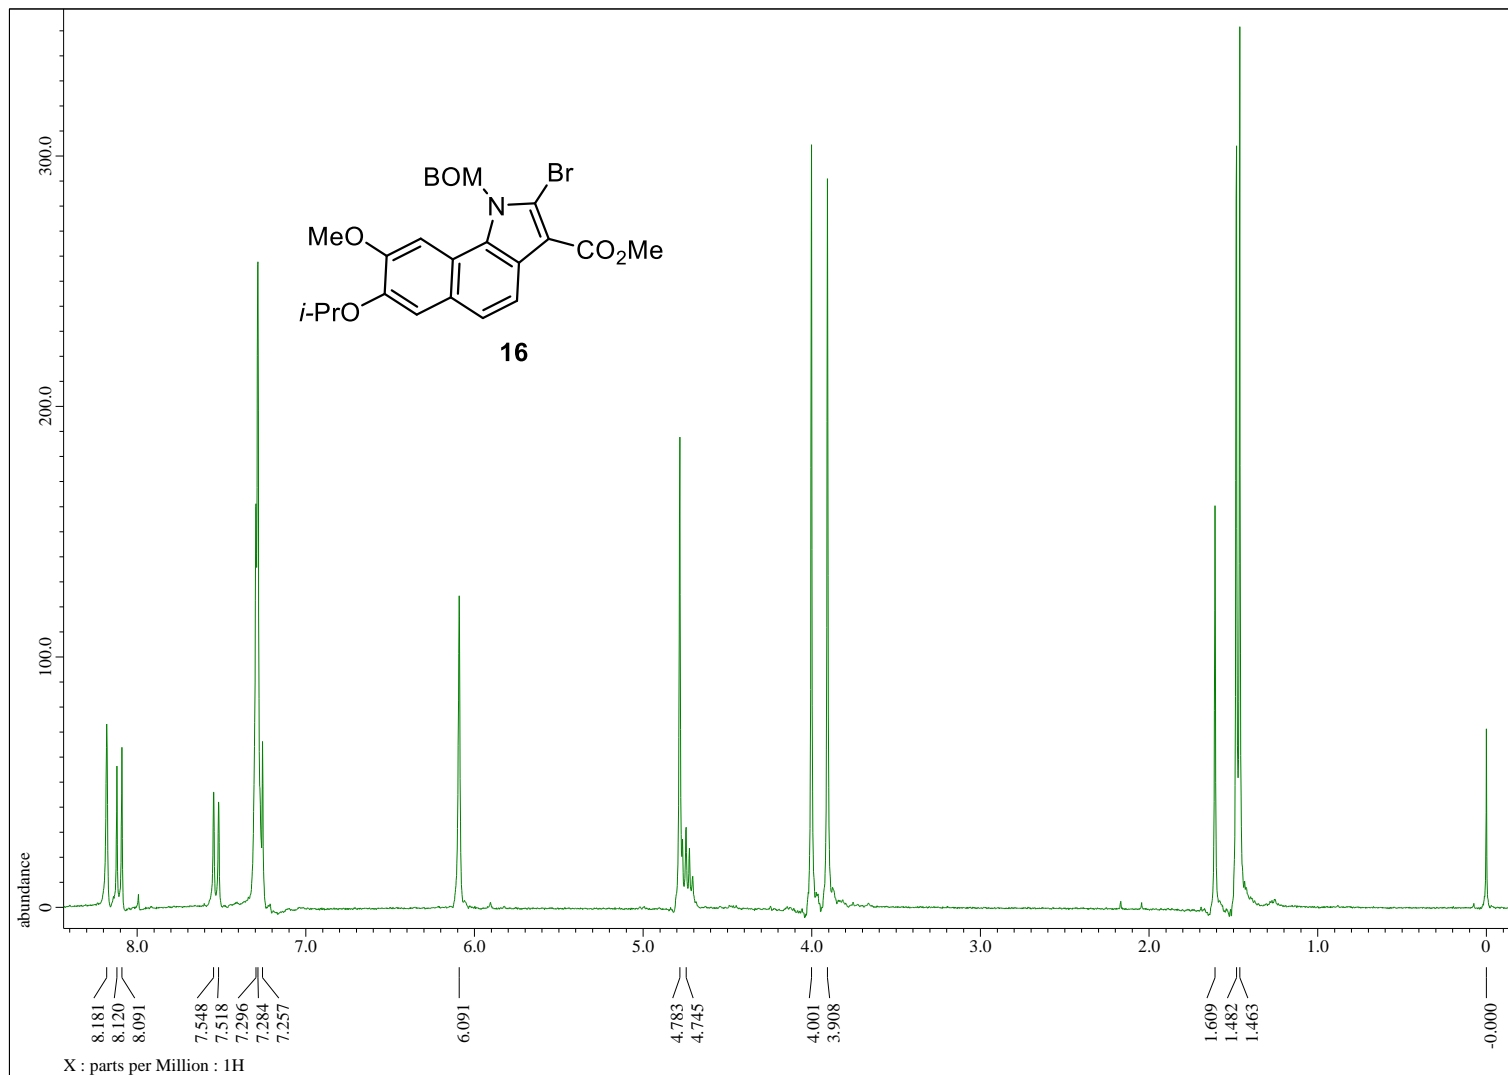

Fig. 38. <sup>1</sup>H NMR Spectrum of Compound **16** (300 MHz, CDCl<sub>3</sub>)

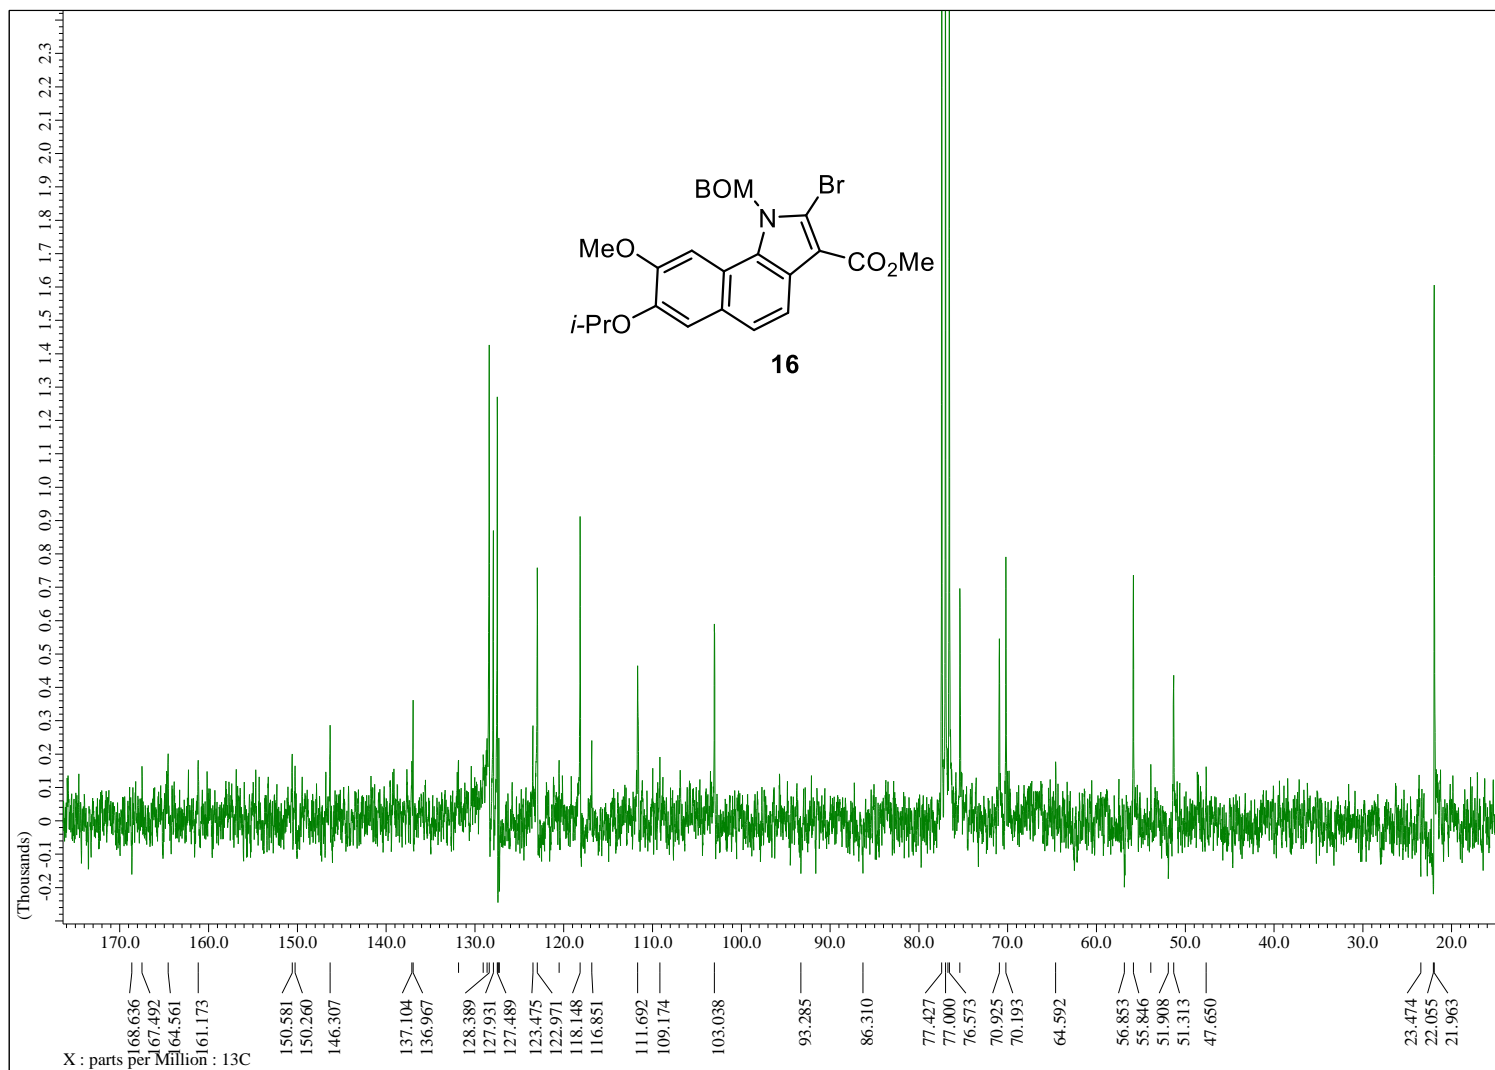

Fig. 39. <sup>13</sup>C NMR Spectrum of Compound **16** (75 MHz, CDCl<sub>3</sub>)

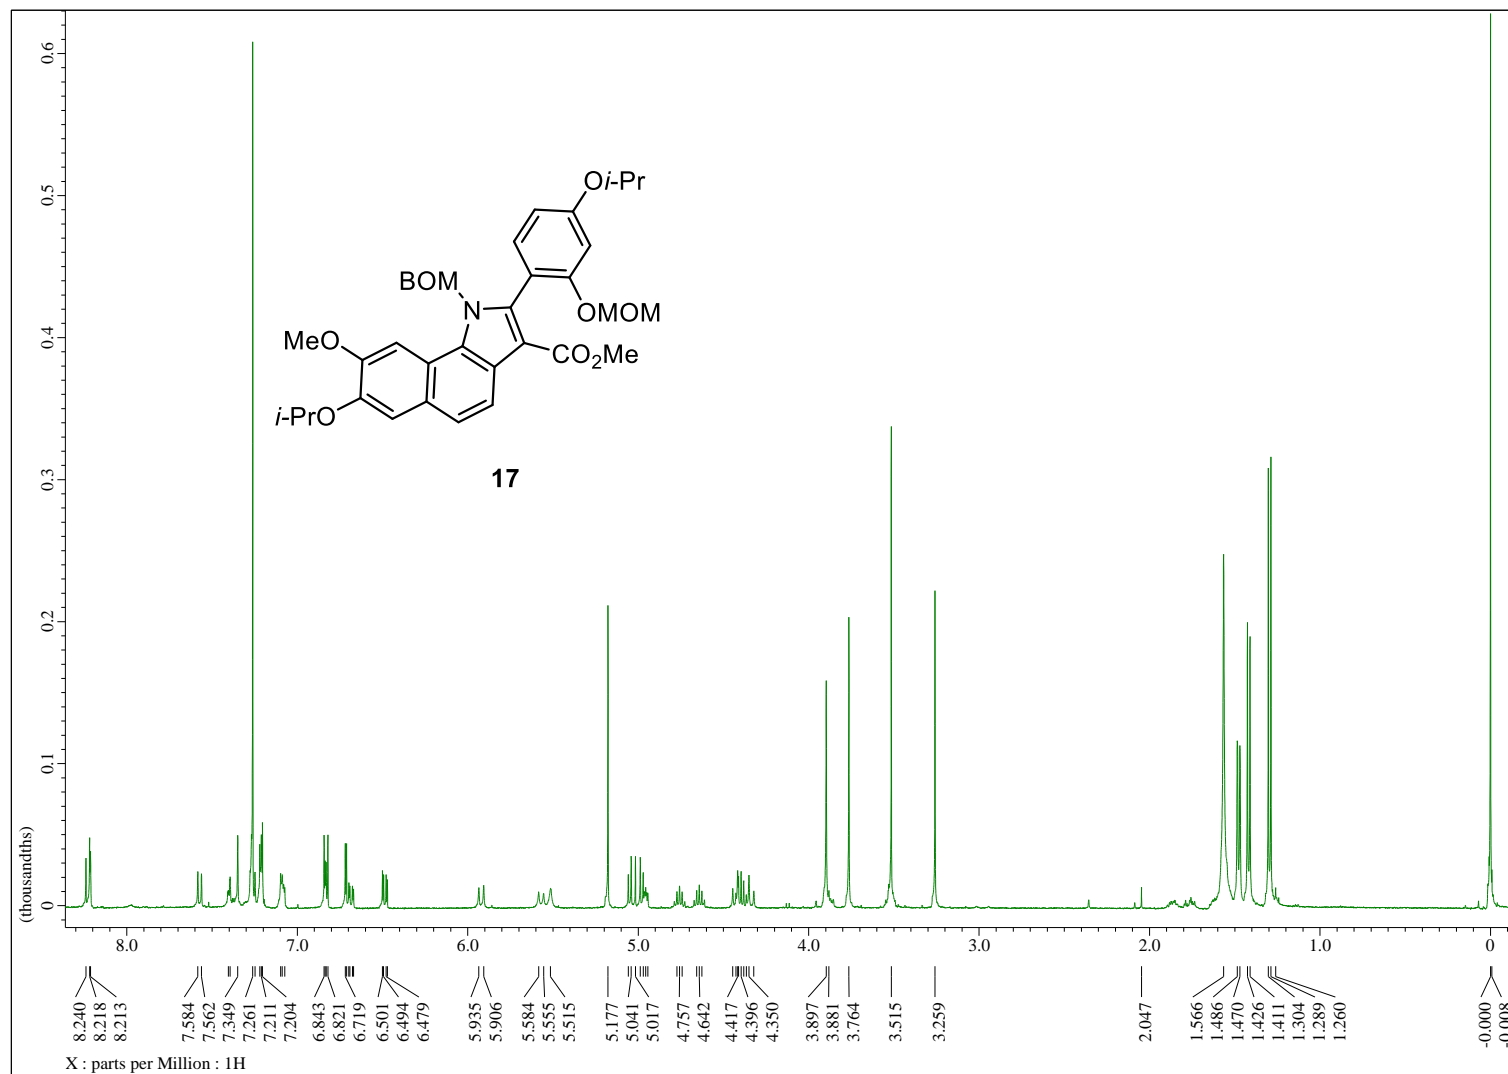

Fig. 40. <sup>1</sup>H NMR Spectrum of Compound 17 (400 MHz, CDCl<sub>3</sub>)

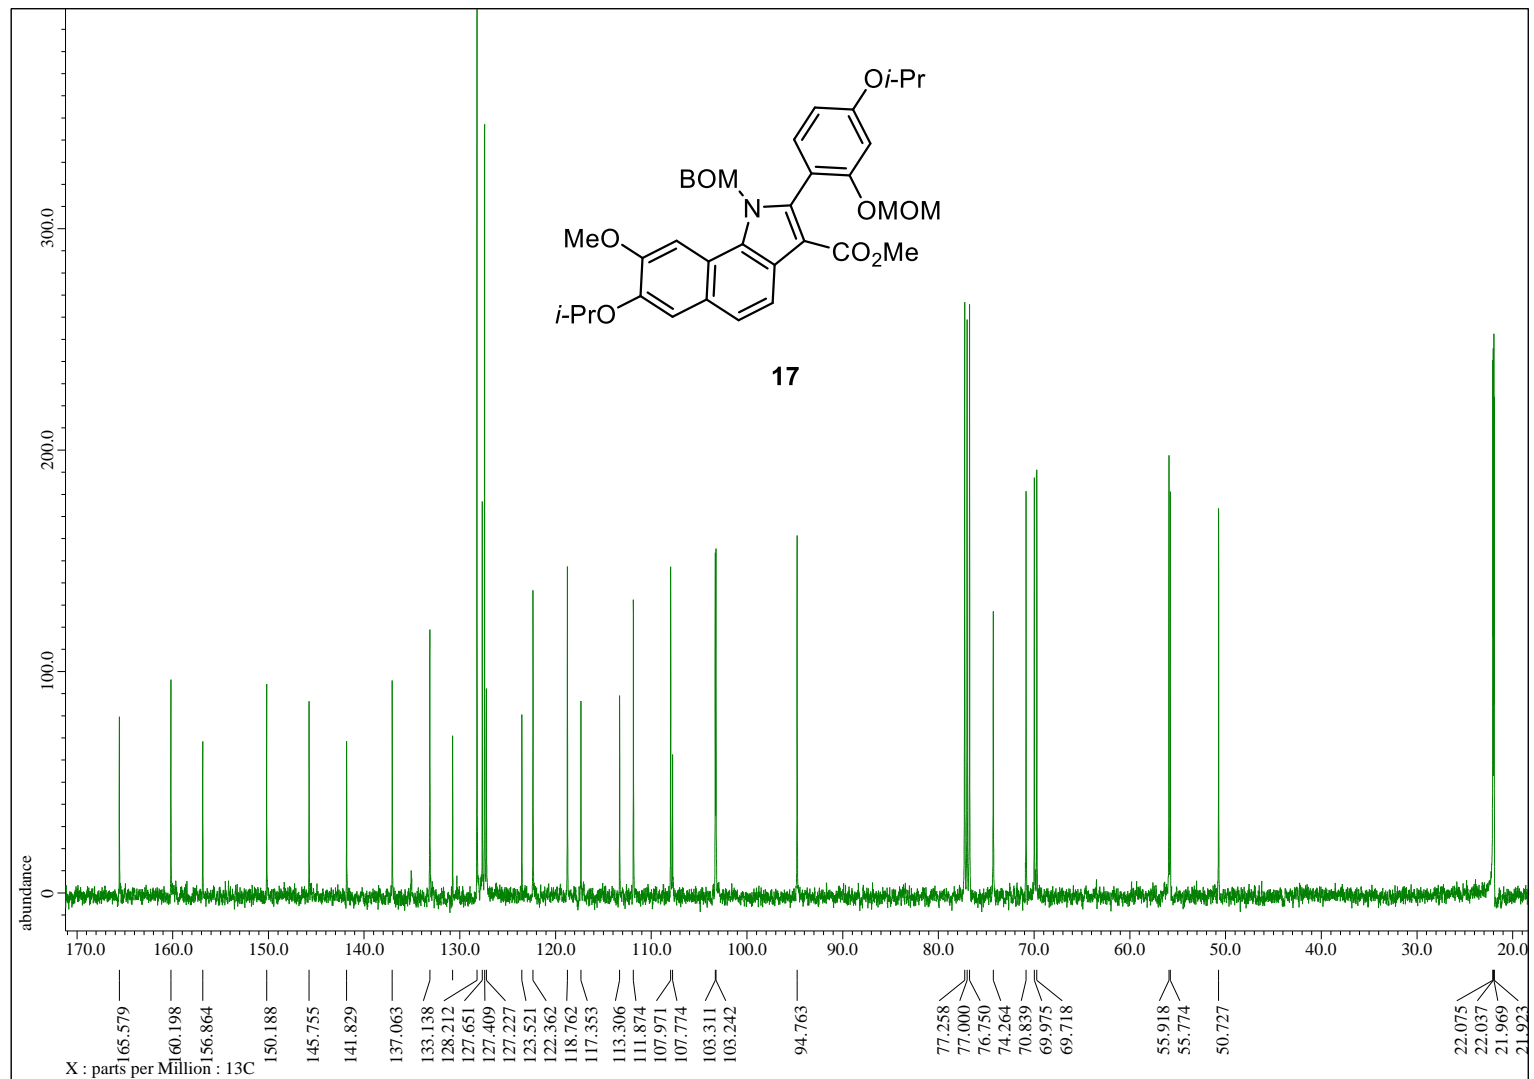

Fig. 41. <sup>13</sup>C NMR Spectrum of Compound 17 (125 MHz, CDCl<sub>3</sub>)

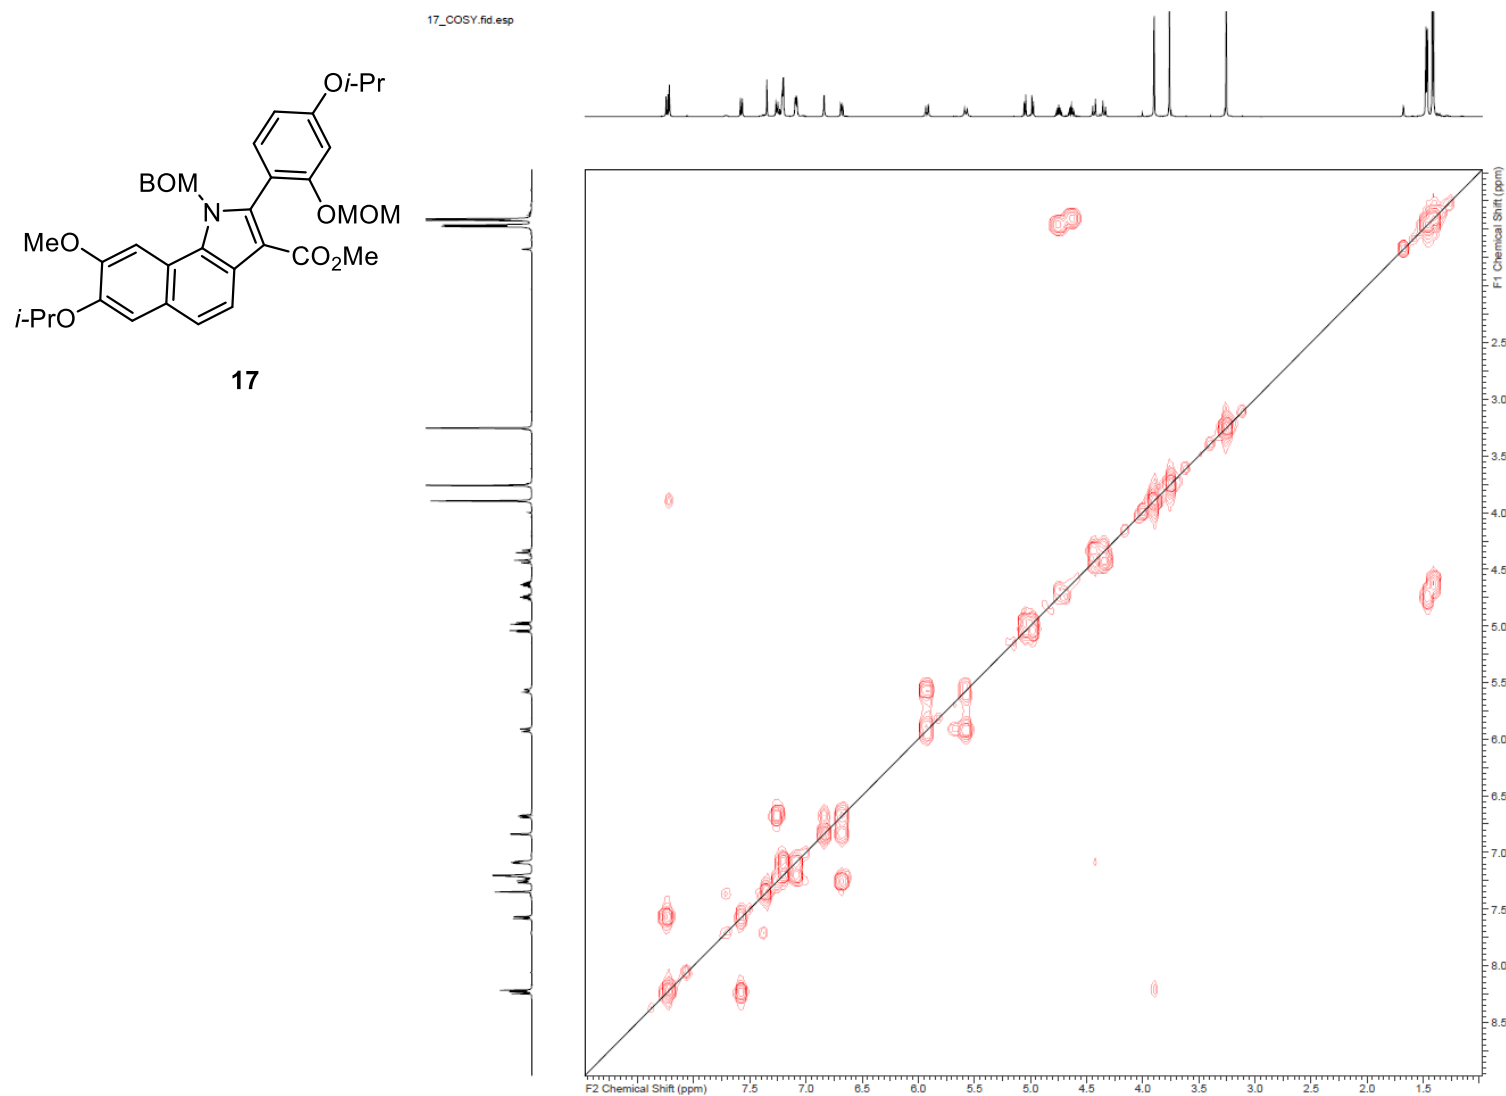

Fig. 42. COSY Spectrum of Compound **17**

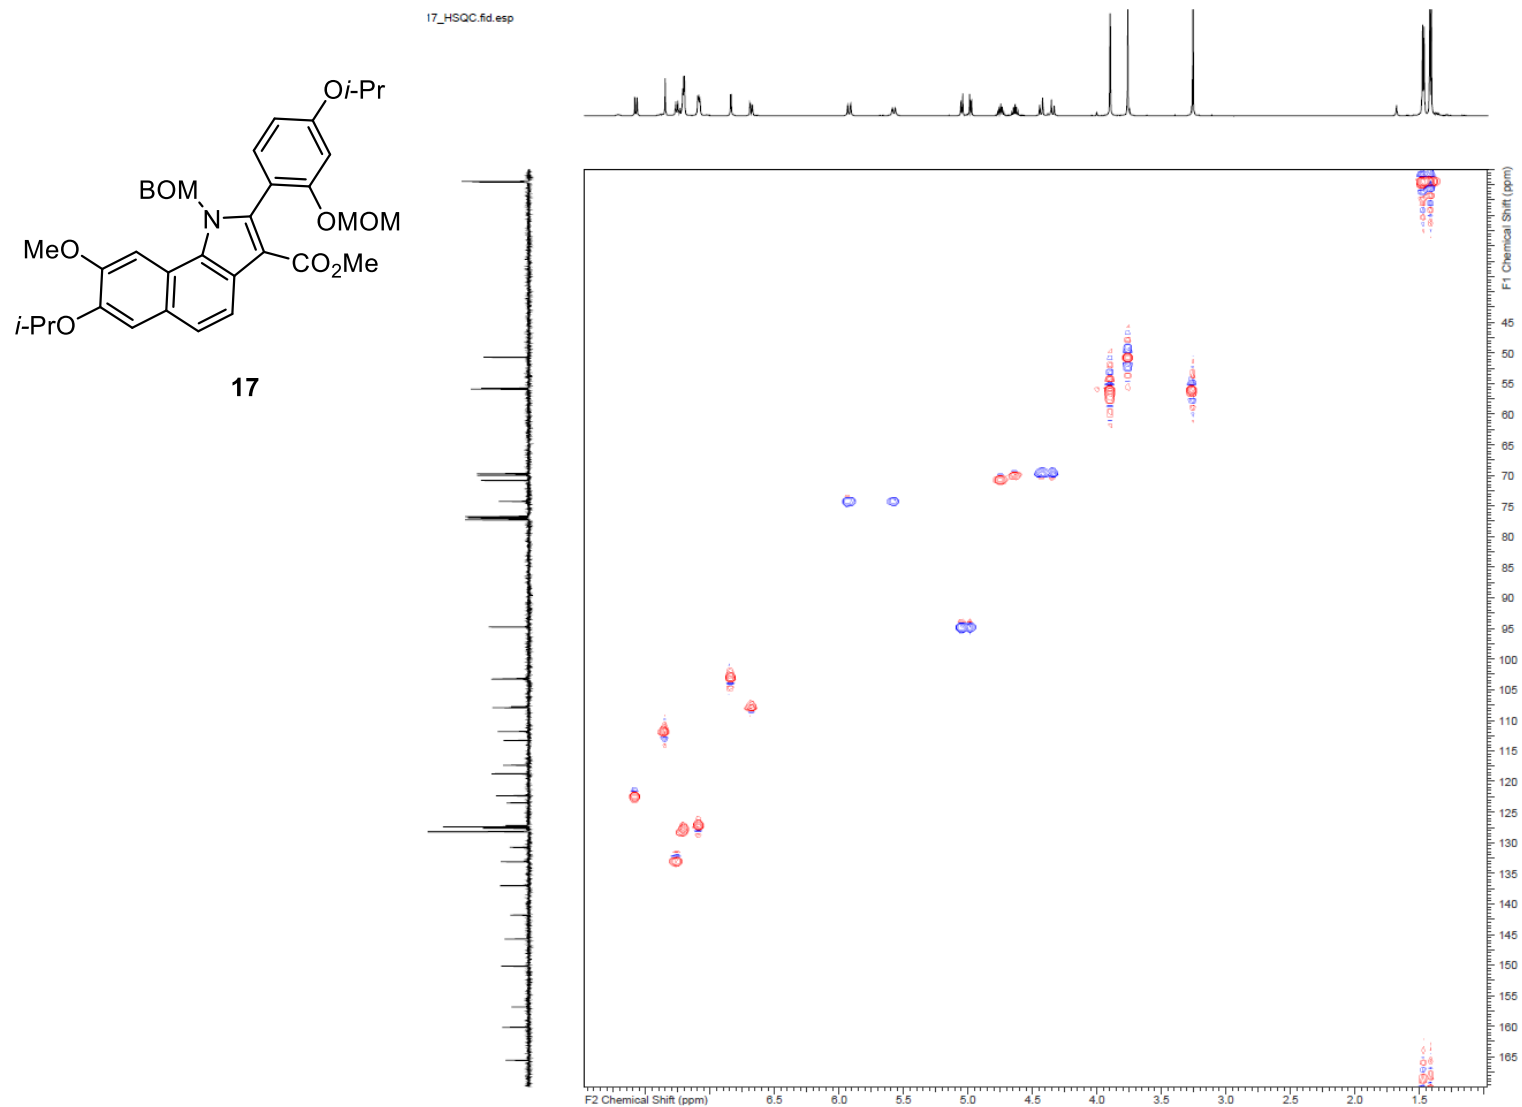

Fig. 43. HSQC Spectrum of Compound **17**

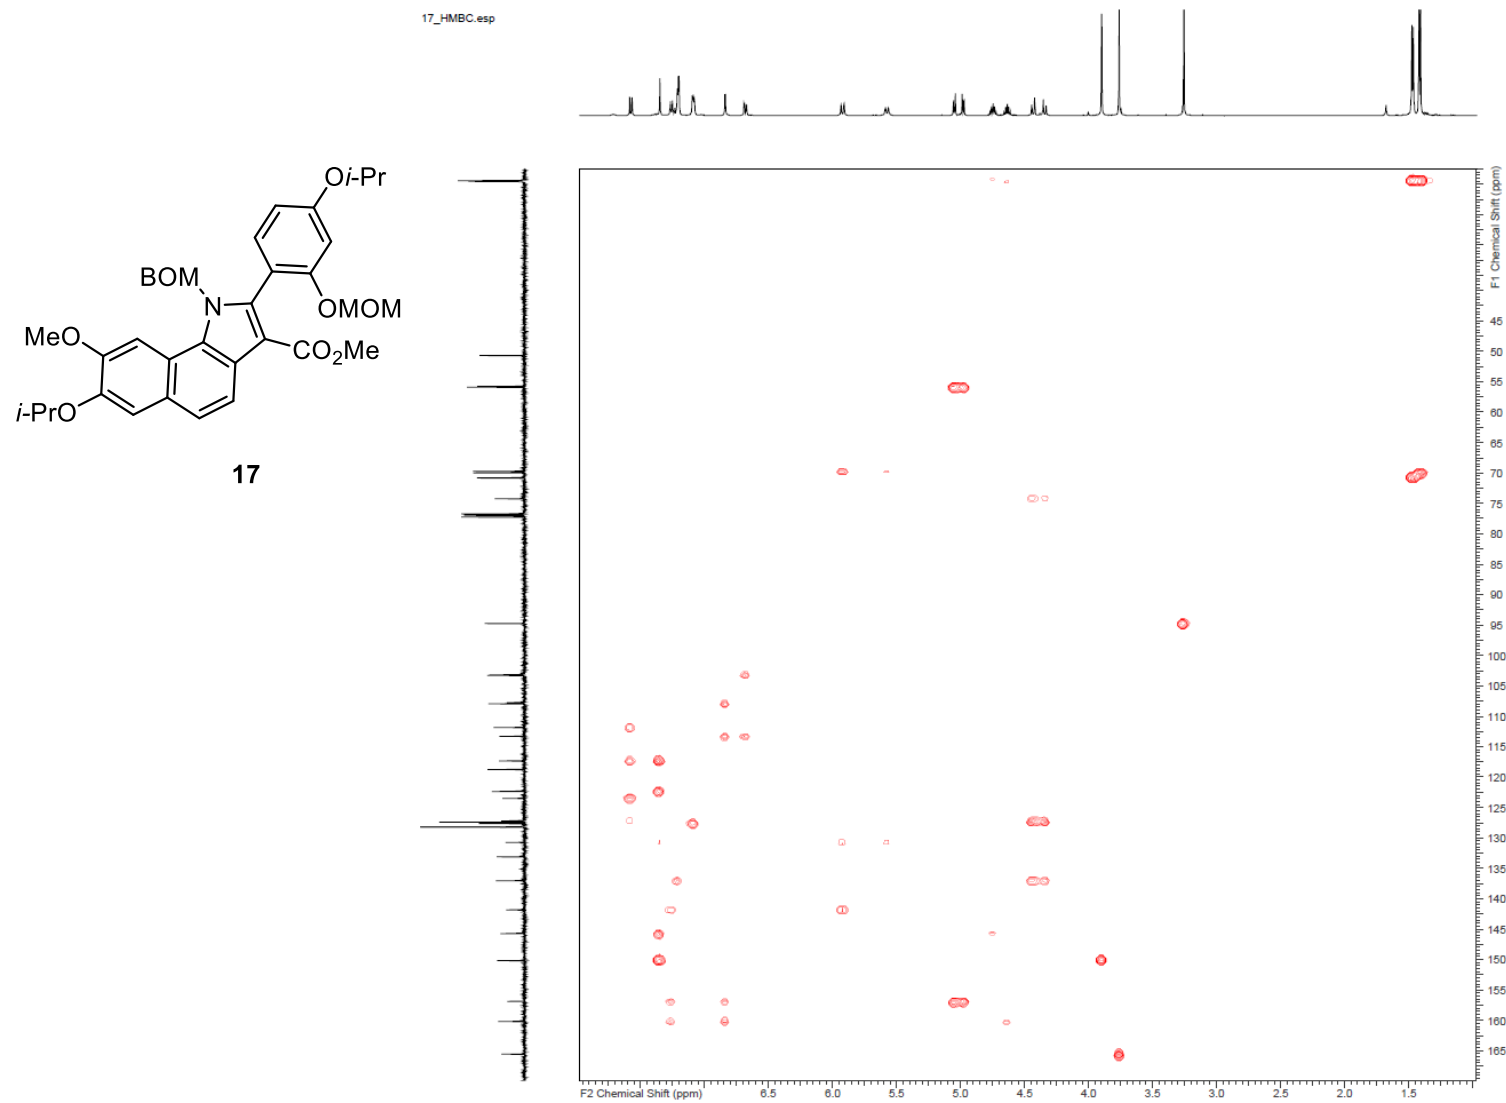



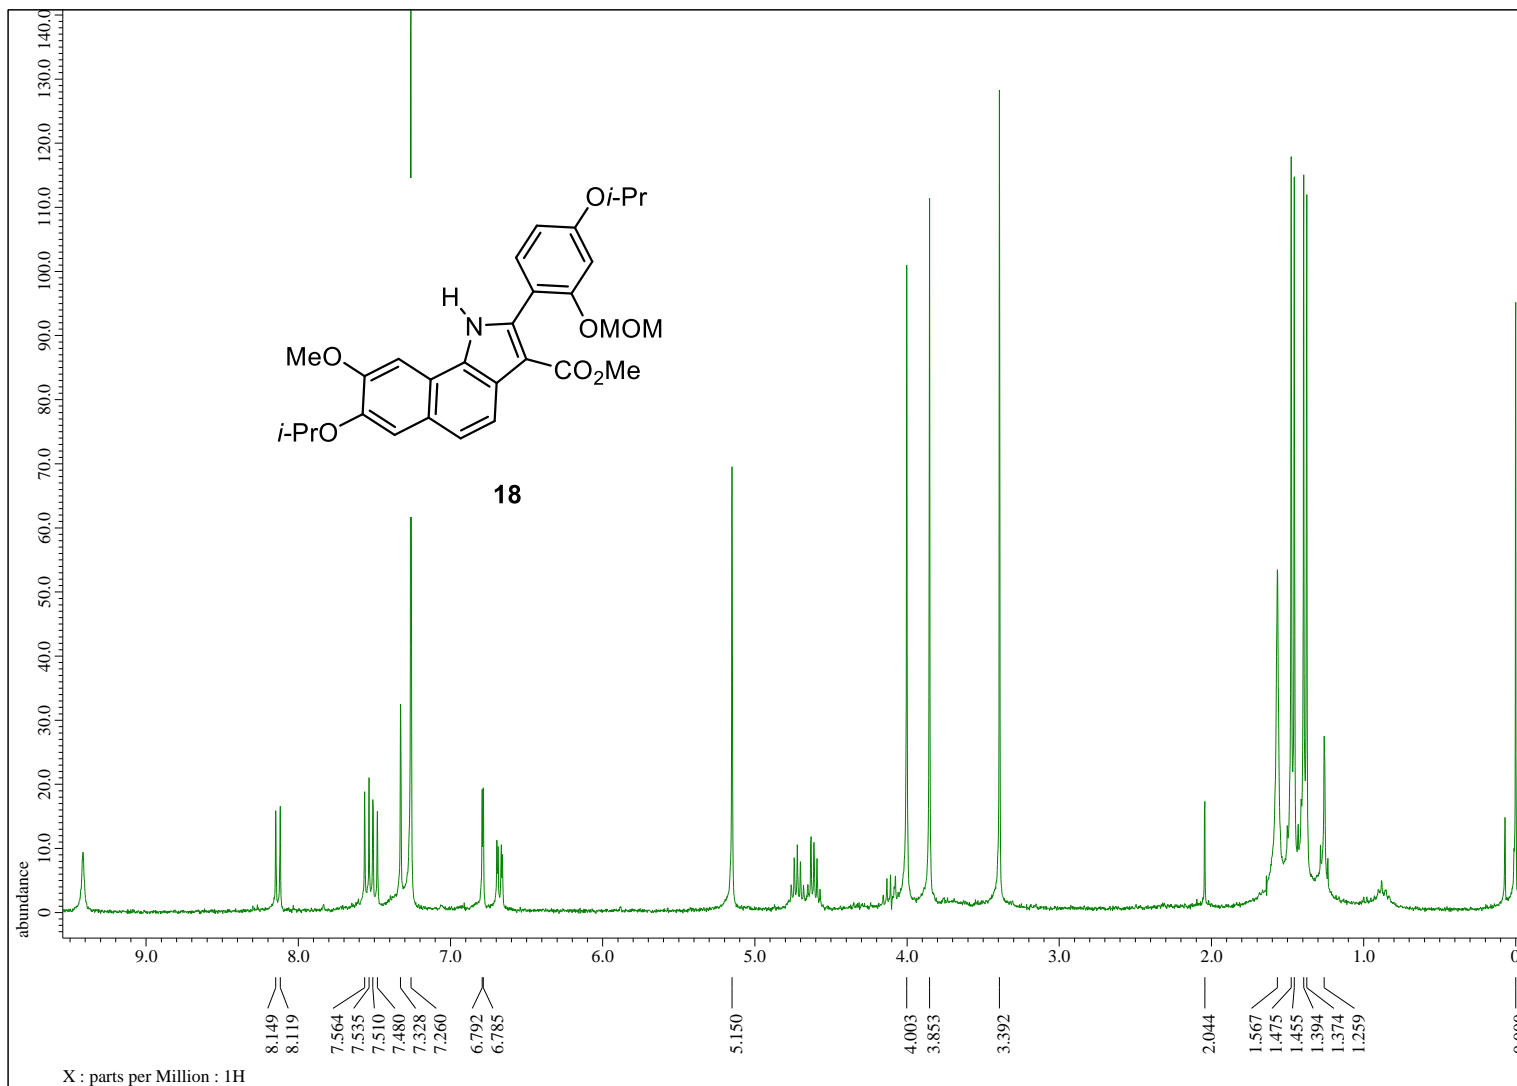

Fig. 45. <sup>1</sup>H NMR Spectrum of Compound **18** (300 MHz, CDCl<sub>3</sub>)

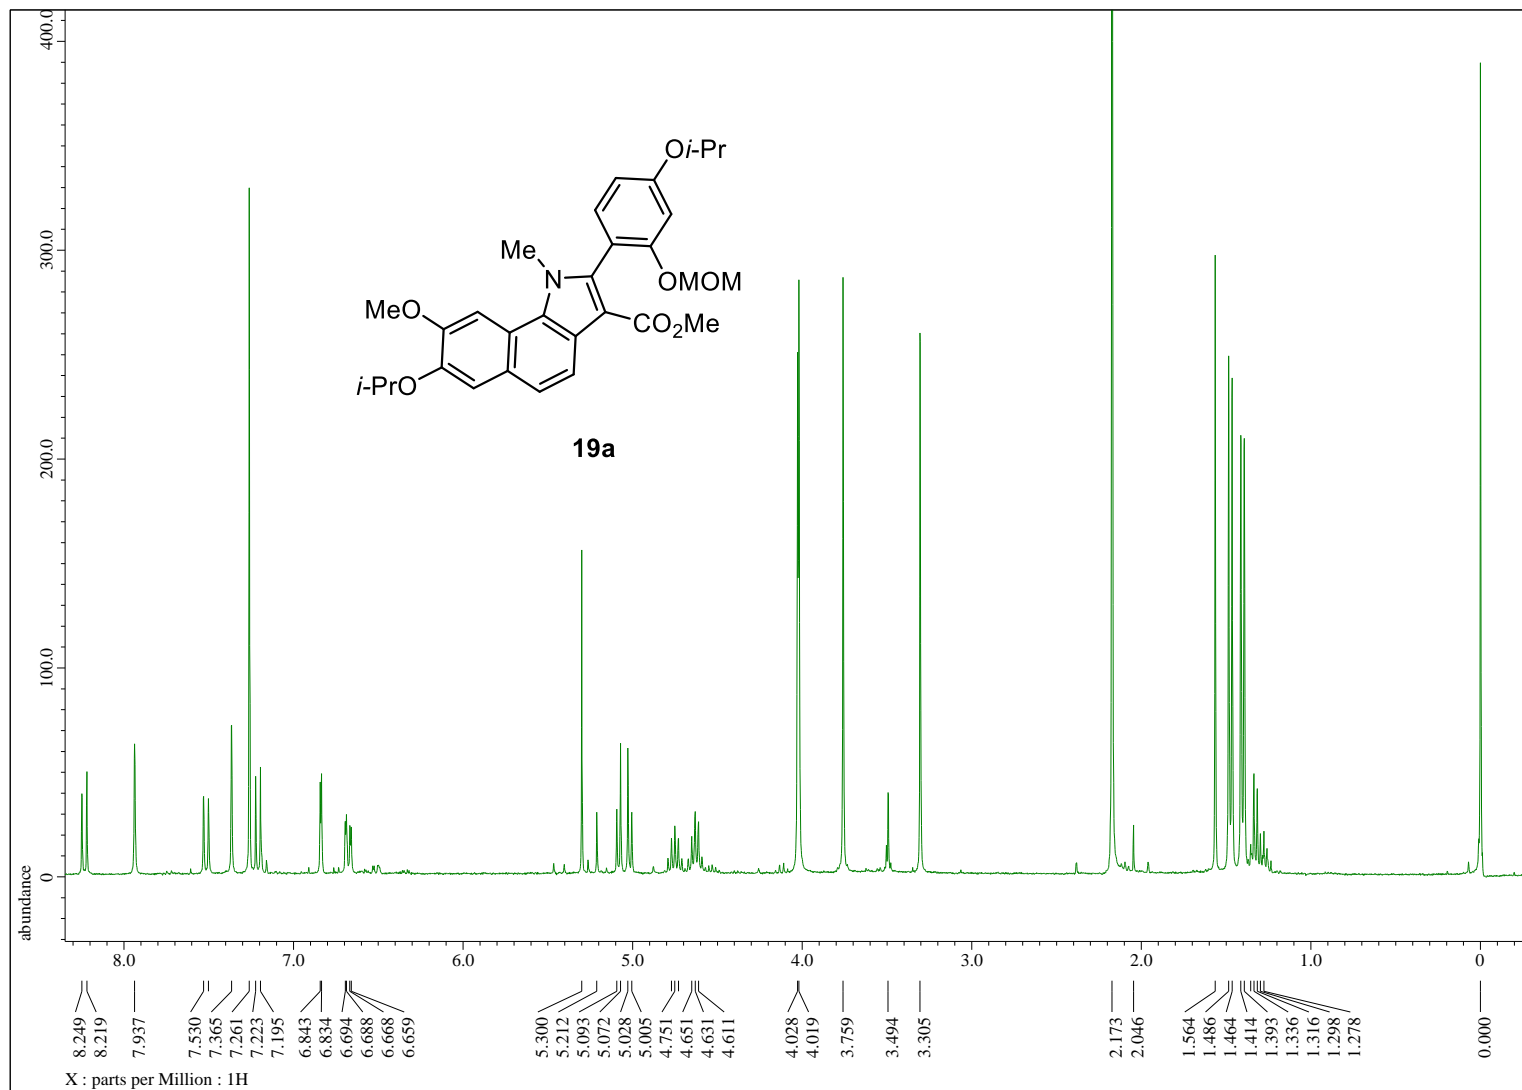

Fig. 46. <sup>1</sup>H NMR Spectrum of Compound **19a** (400 MHz, CDCl<sub>3</sub>)

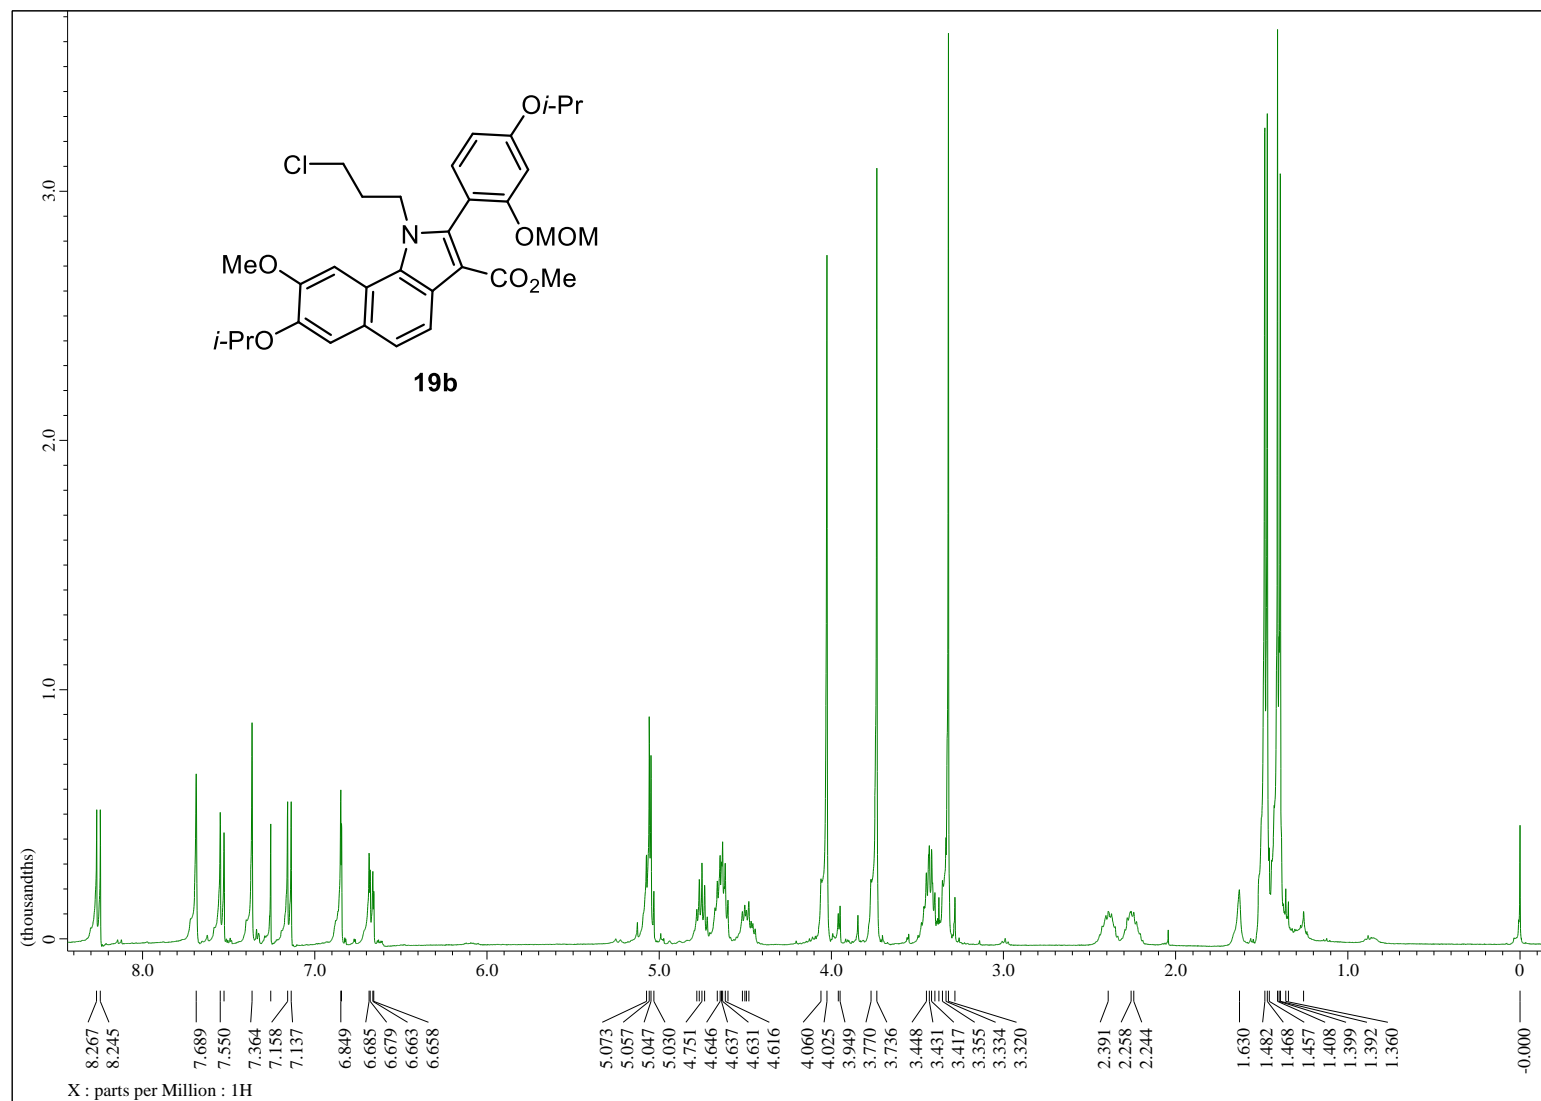

Fig. 47. <sup>1</sup>H NMR Spectrum of Compound **19b** (400 MHz, CDCl<sub>3</sub>)

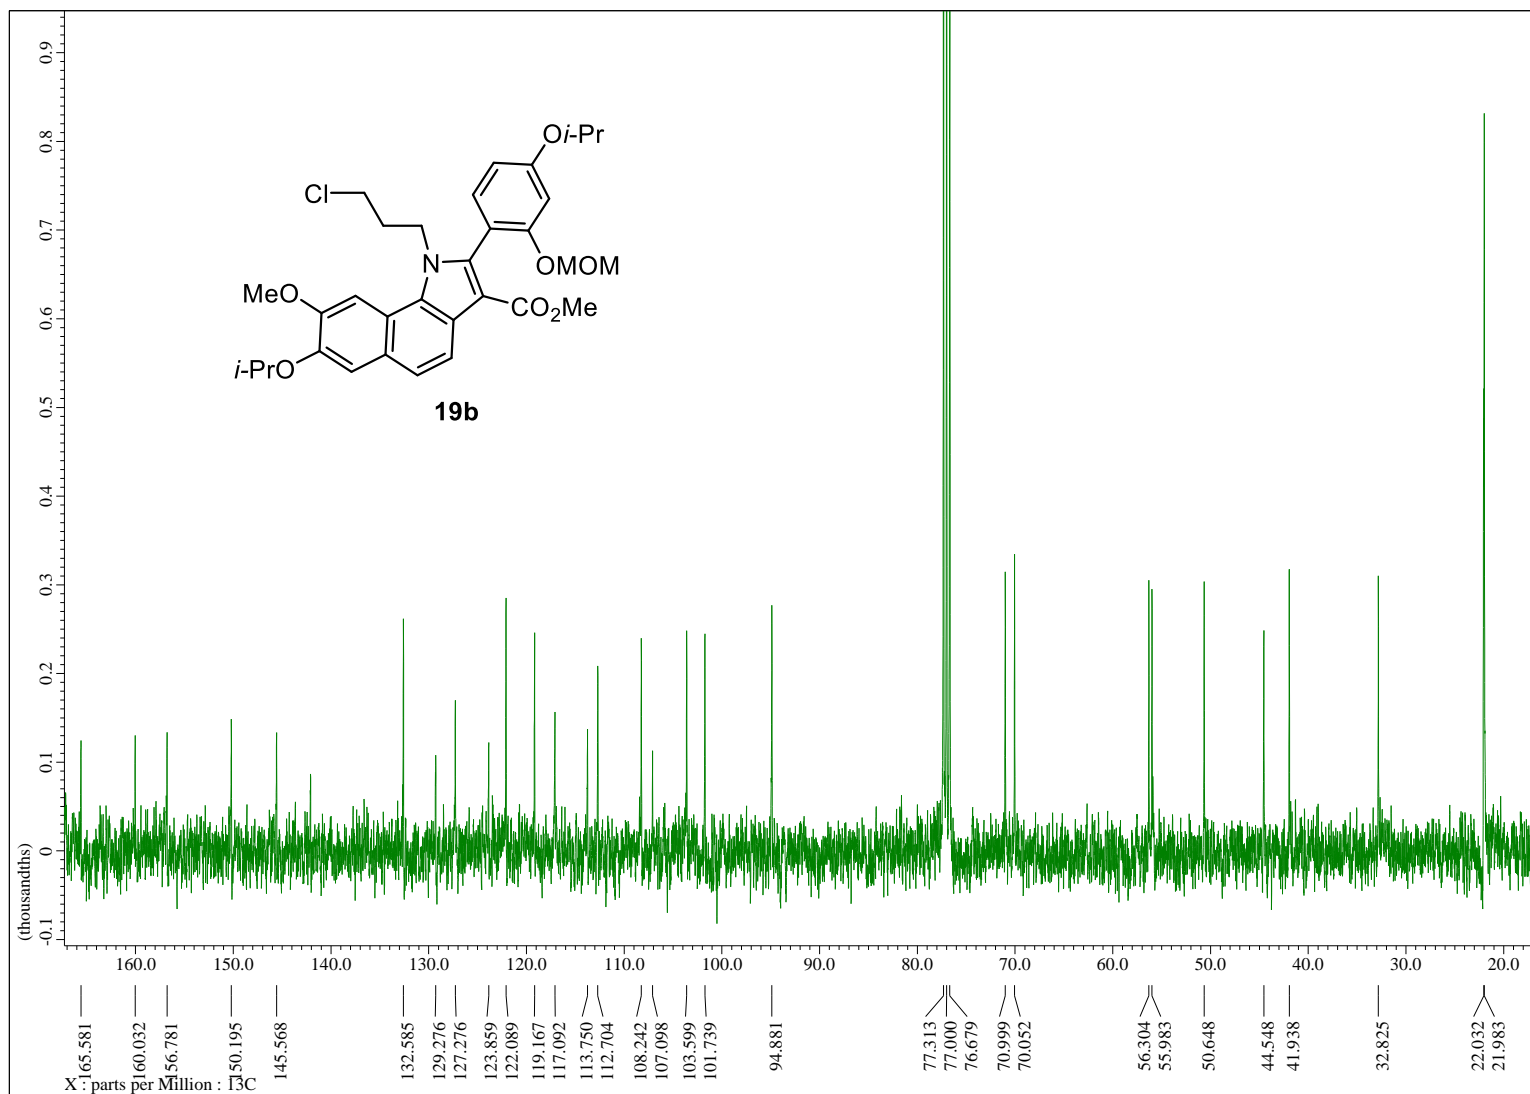

Fig. 48. <sup>13</sup>C NMR Spectrum of Compound **19b** (100 MHz, CDCl<sub>3</sub>)

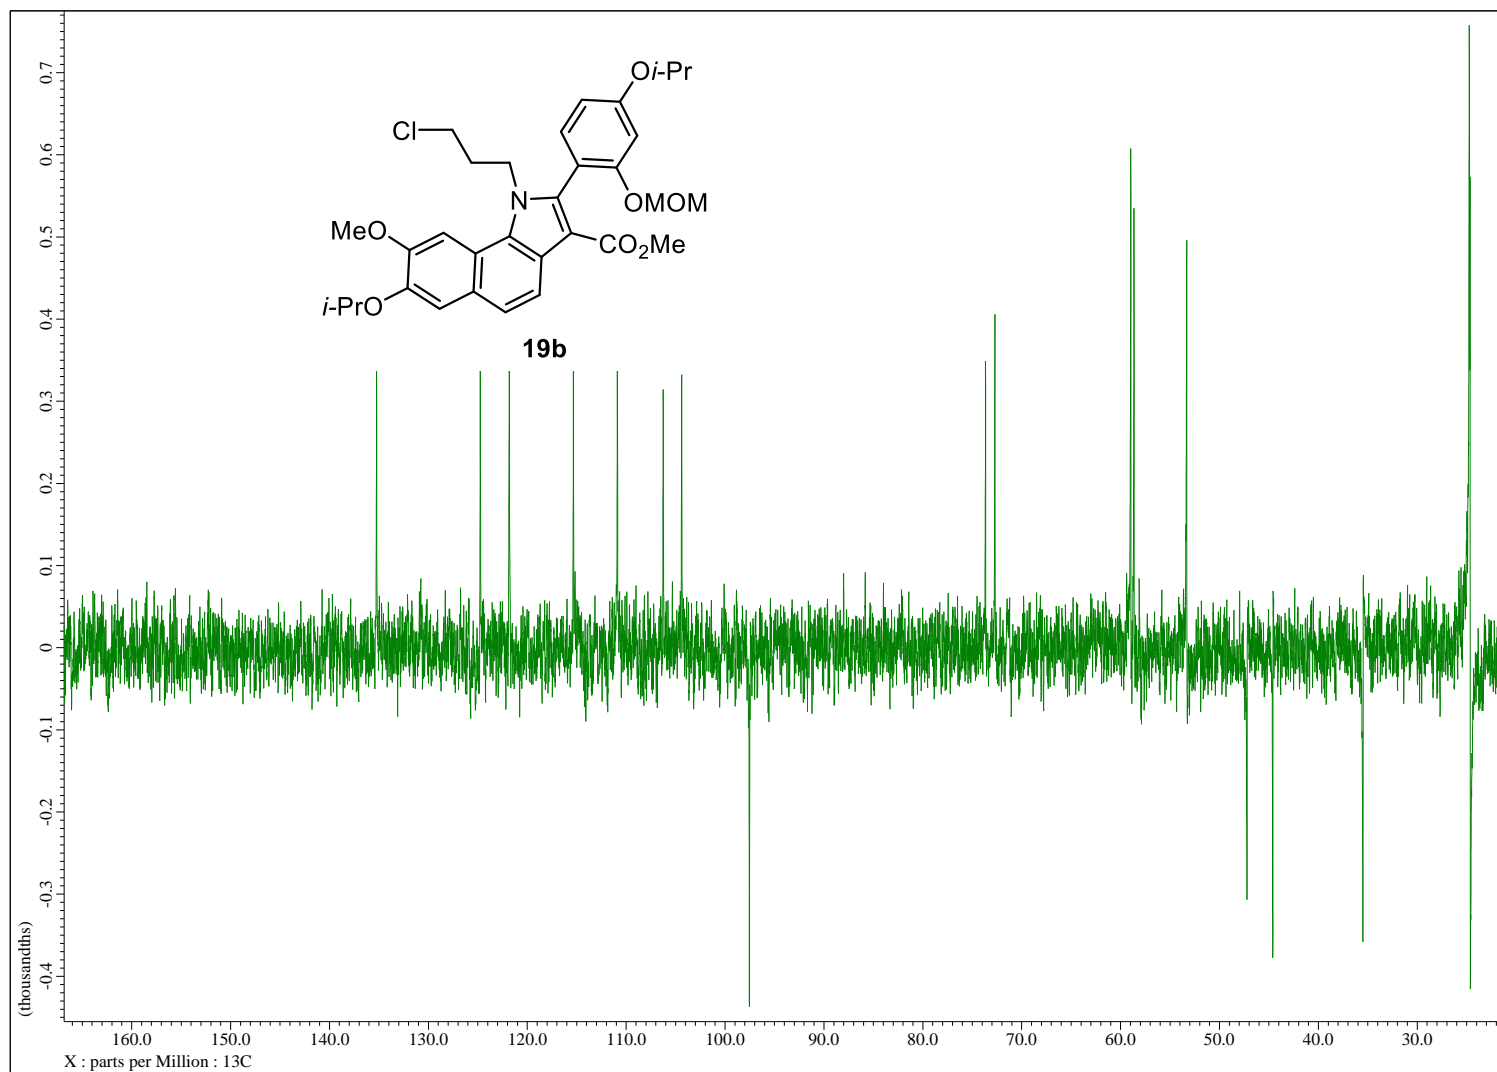

Fig. 49. DEPT Spectrum of 19b

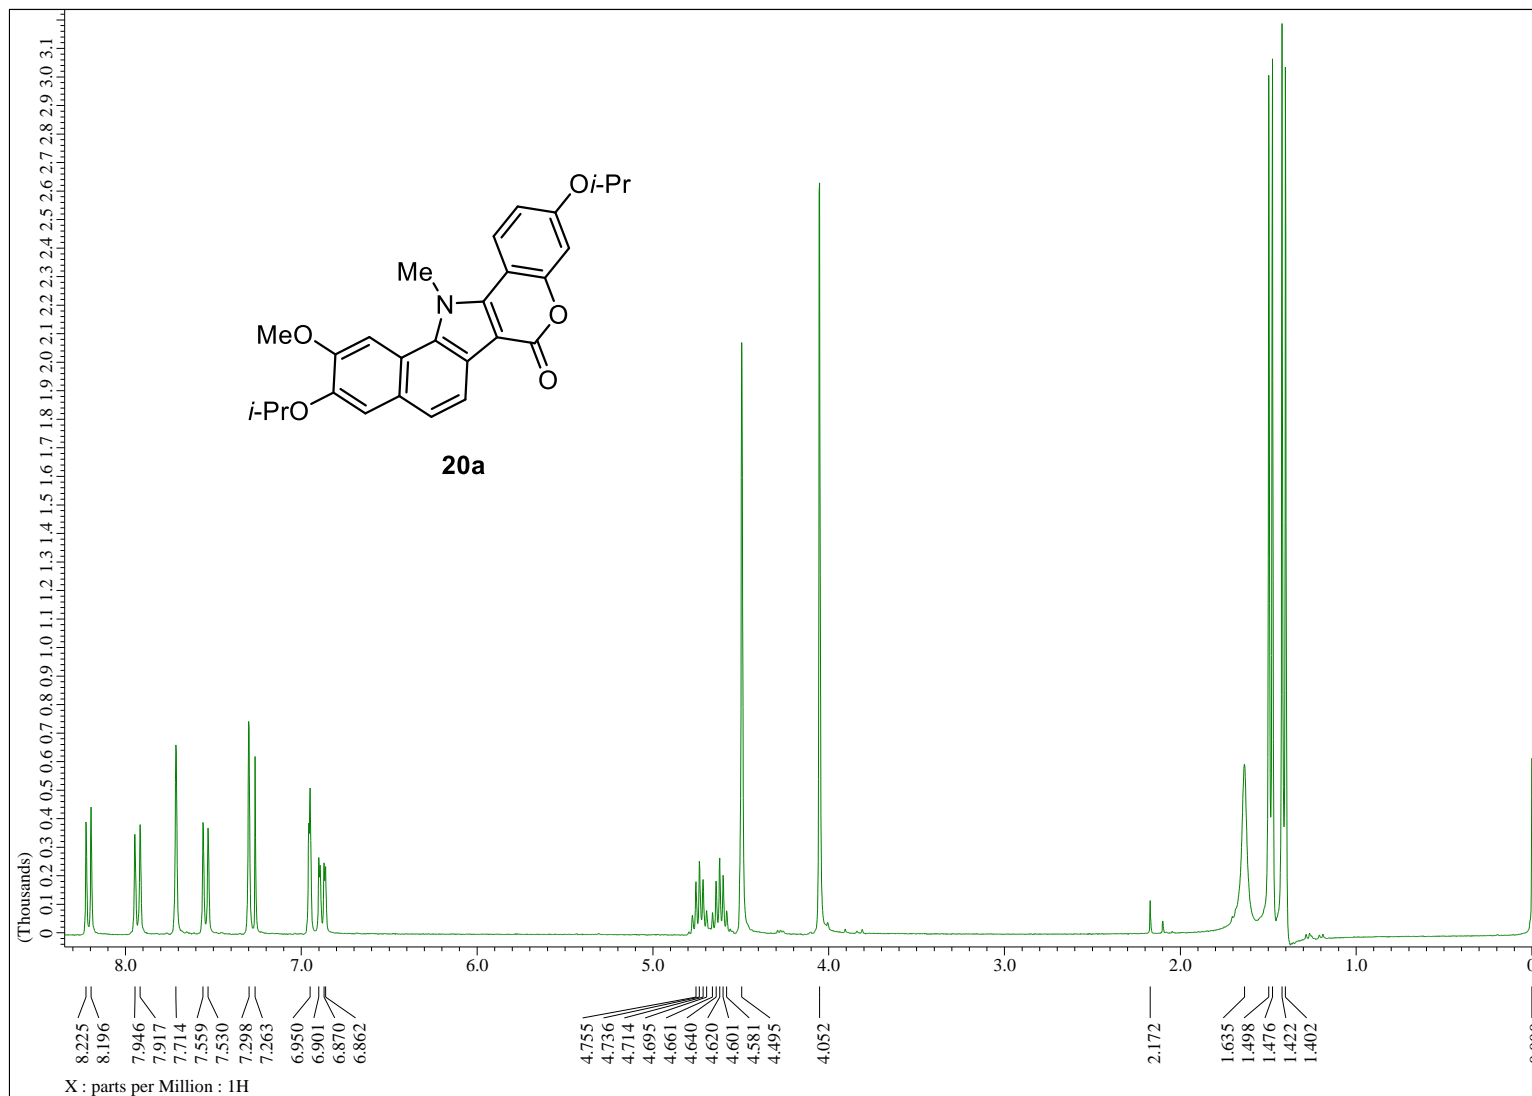

Fig. 50. <sup>1</sup>H NMR Spectrum of Compound **20a** (300 MHz, CDCl<sub>3</sub>)

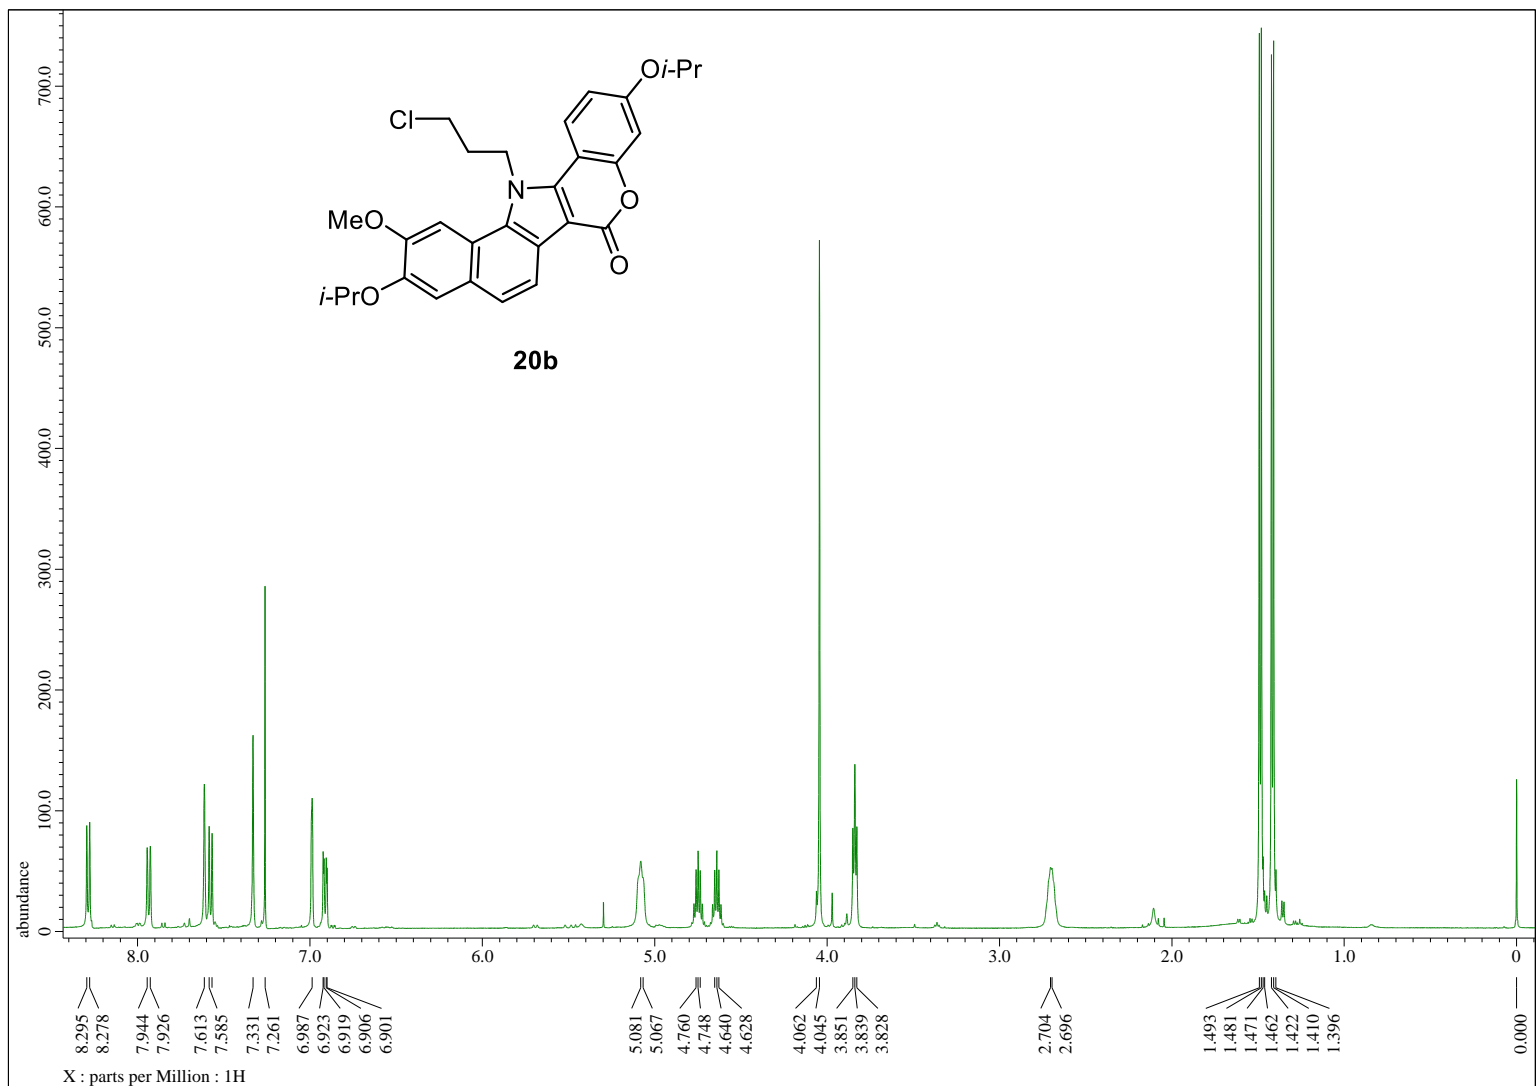

Fig. 51. <sup>1</sup>H NMR Spectrum of Compound **20b** (500 MHz, CDCl<sub>3</sub>)

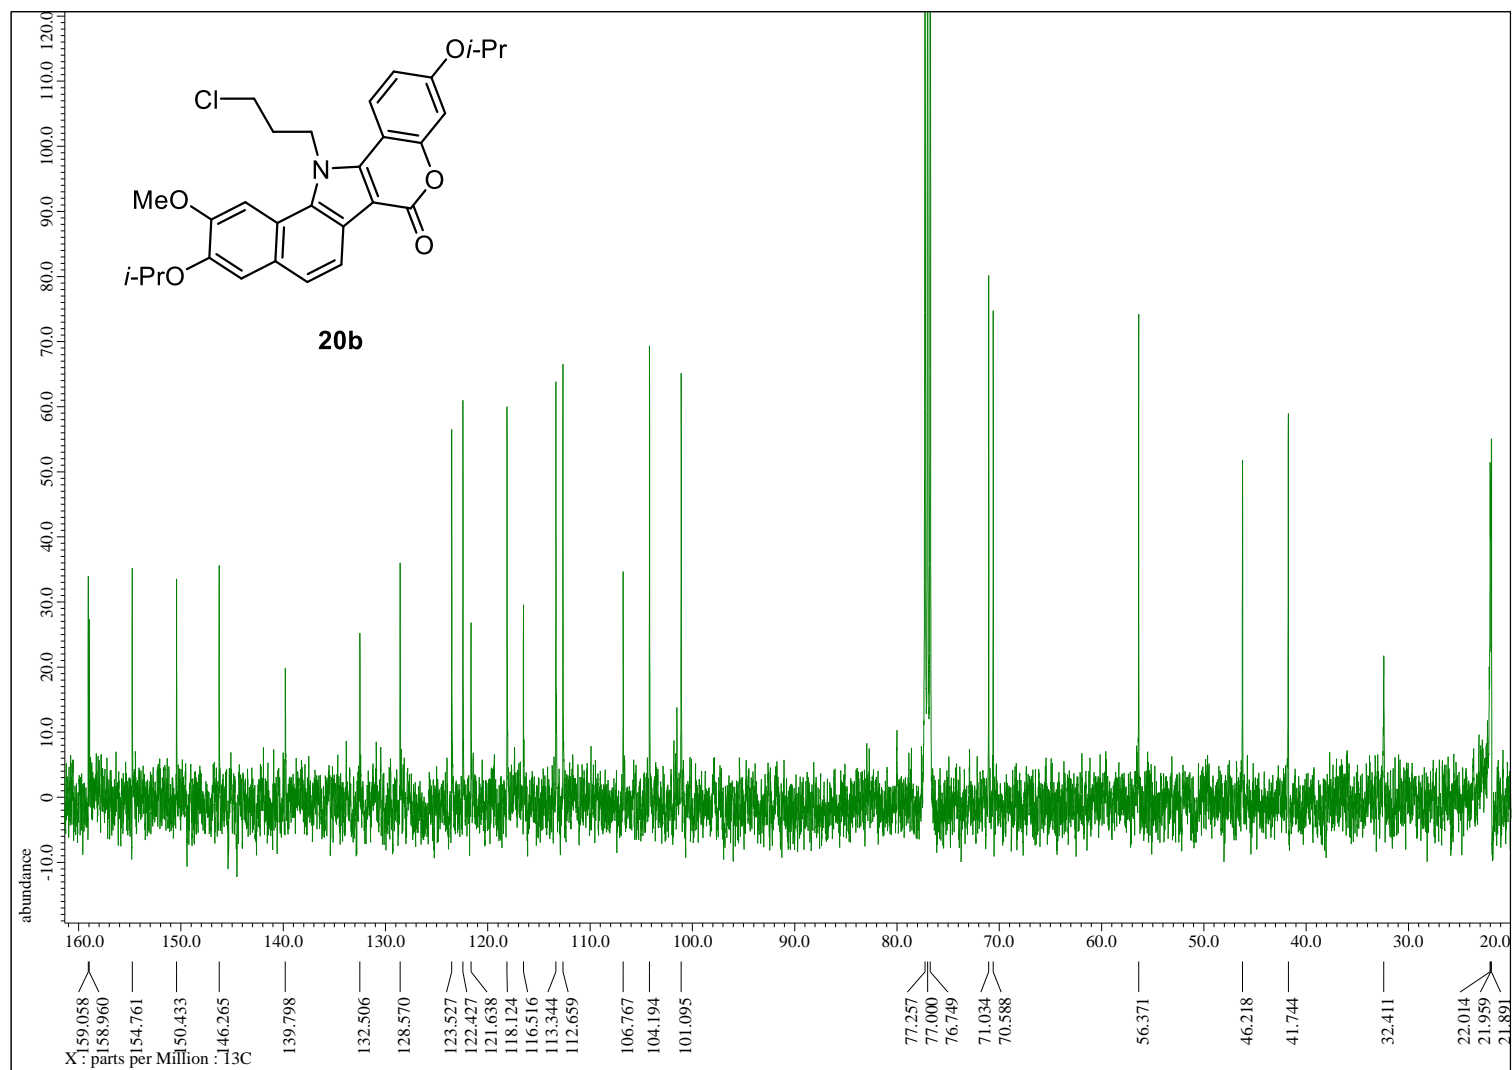

Fig. 52.  $^{13}\text{C}$  NMR Spectrum of Compound **20b** (125 MHz,  $\text{CDCl}_3$ )



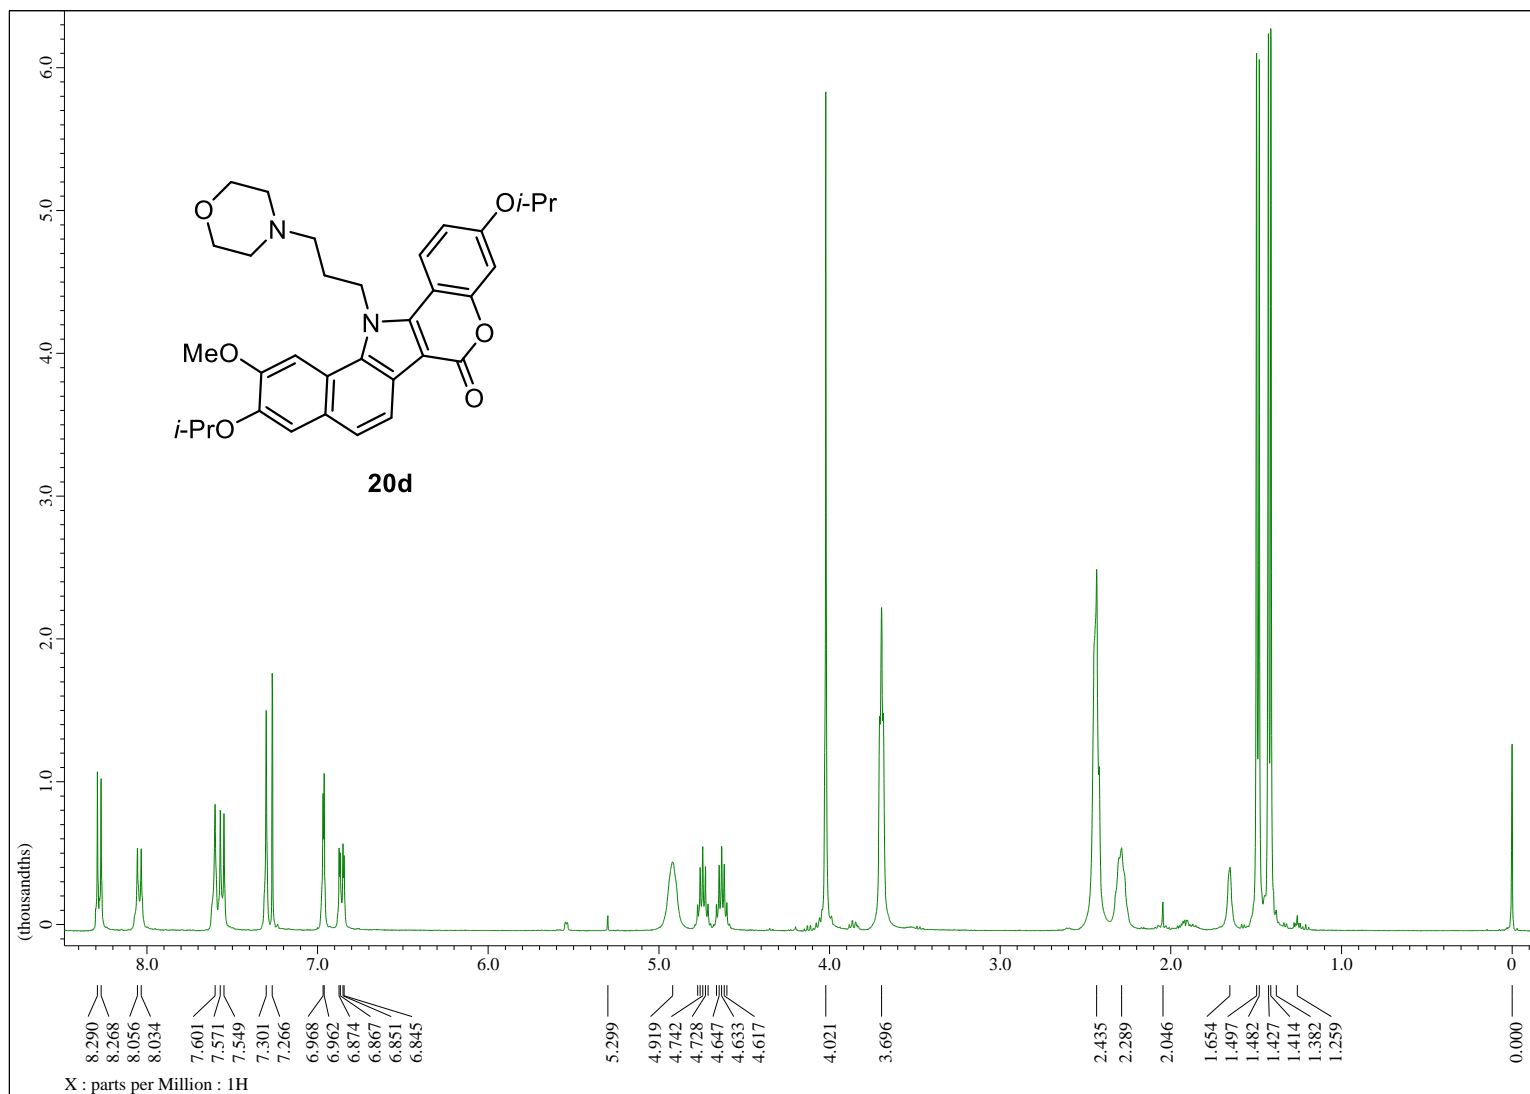

Fig. 53. <sup>1</sup>H NMR Spectrum of Compound **20d** (400 MHz, CDCl<sub>3</sub>)

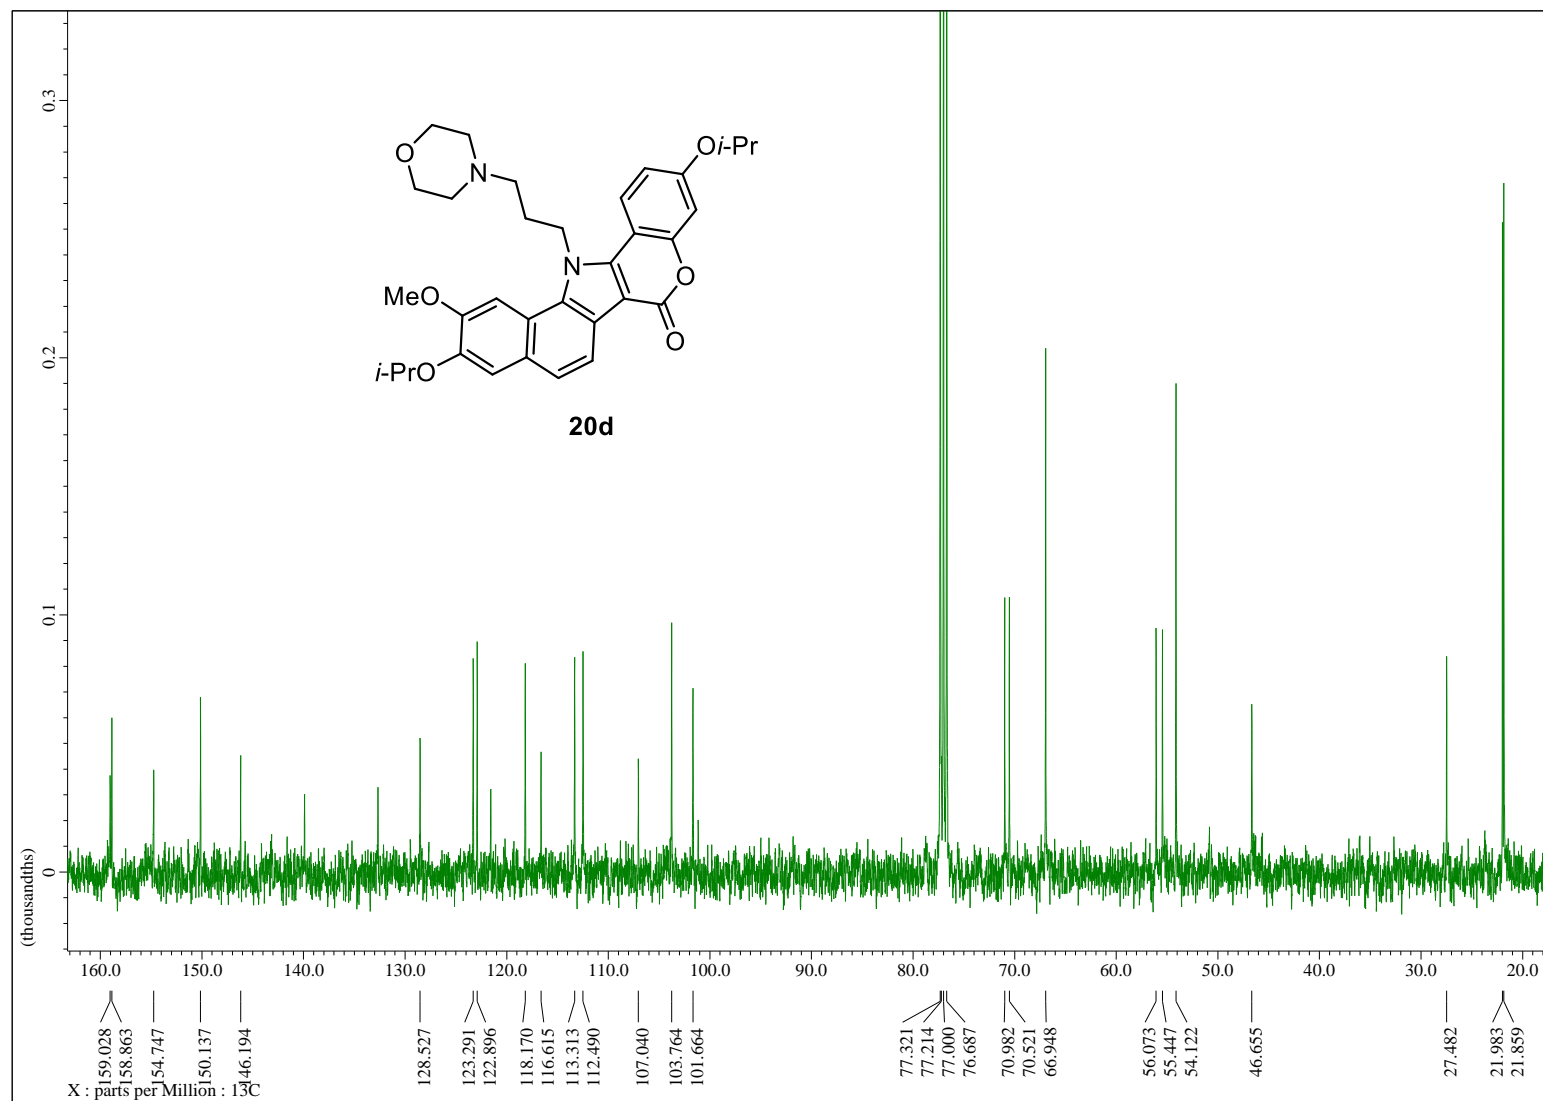

Fig. 54.  $^{13}\text{C}$  NMR Spectrum of Compound **20d** (100 MHz,  $\text{CDCl}_3$ )

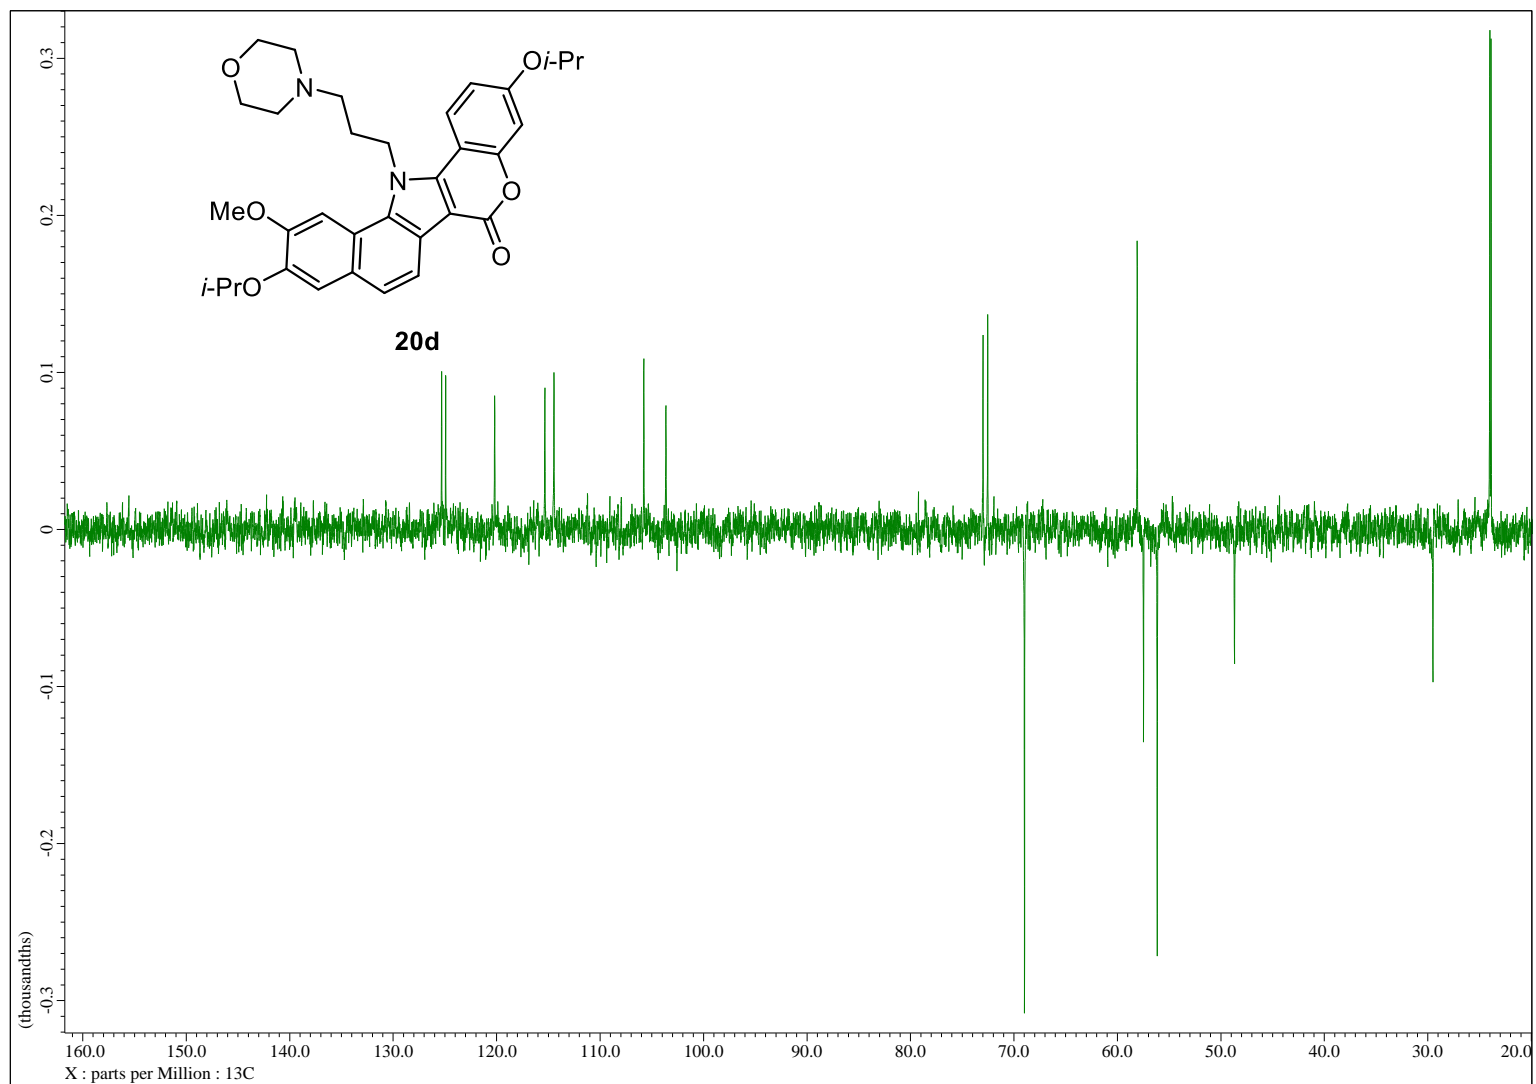

Fig. 55. DEPT Spectrum of Compound **20d** (100 MHz, CDCl<sub>3</sub>)

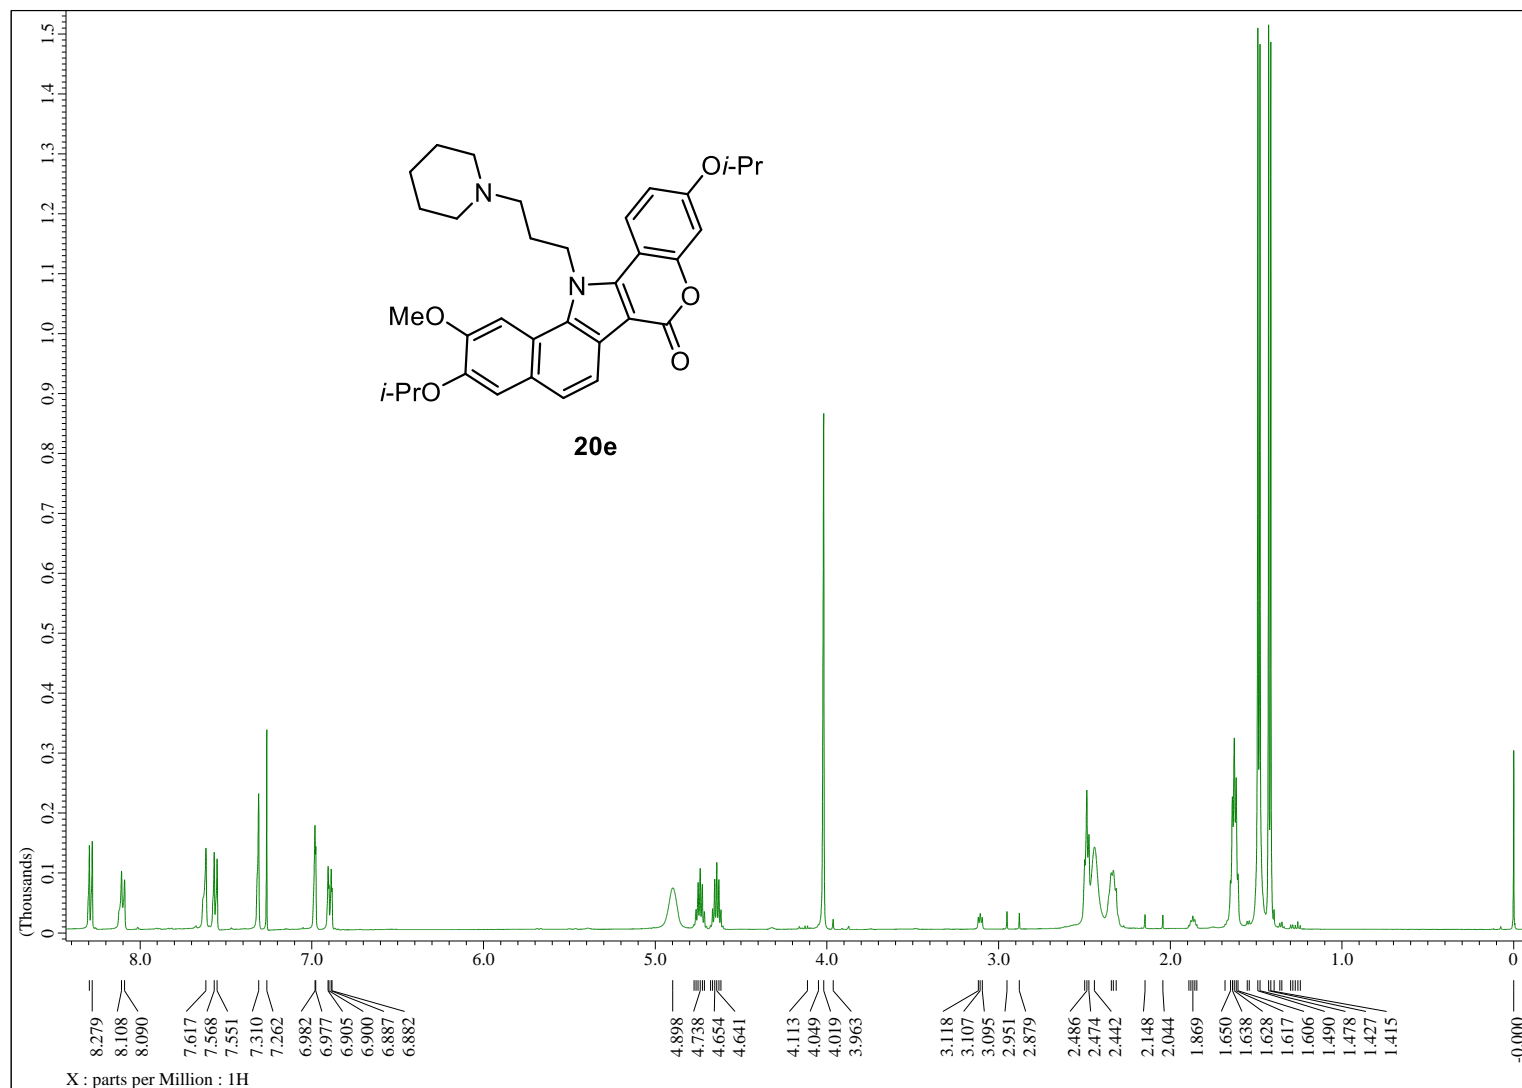

Fig. 56. <sup>1</sup>H NMR Spectrum of Compound **20e** (500 MHz, CDCl<sub>3</sub>)



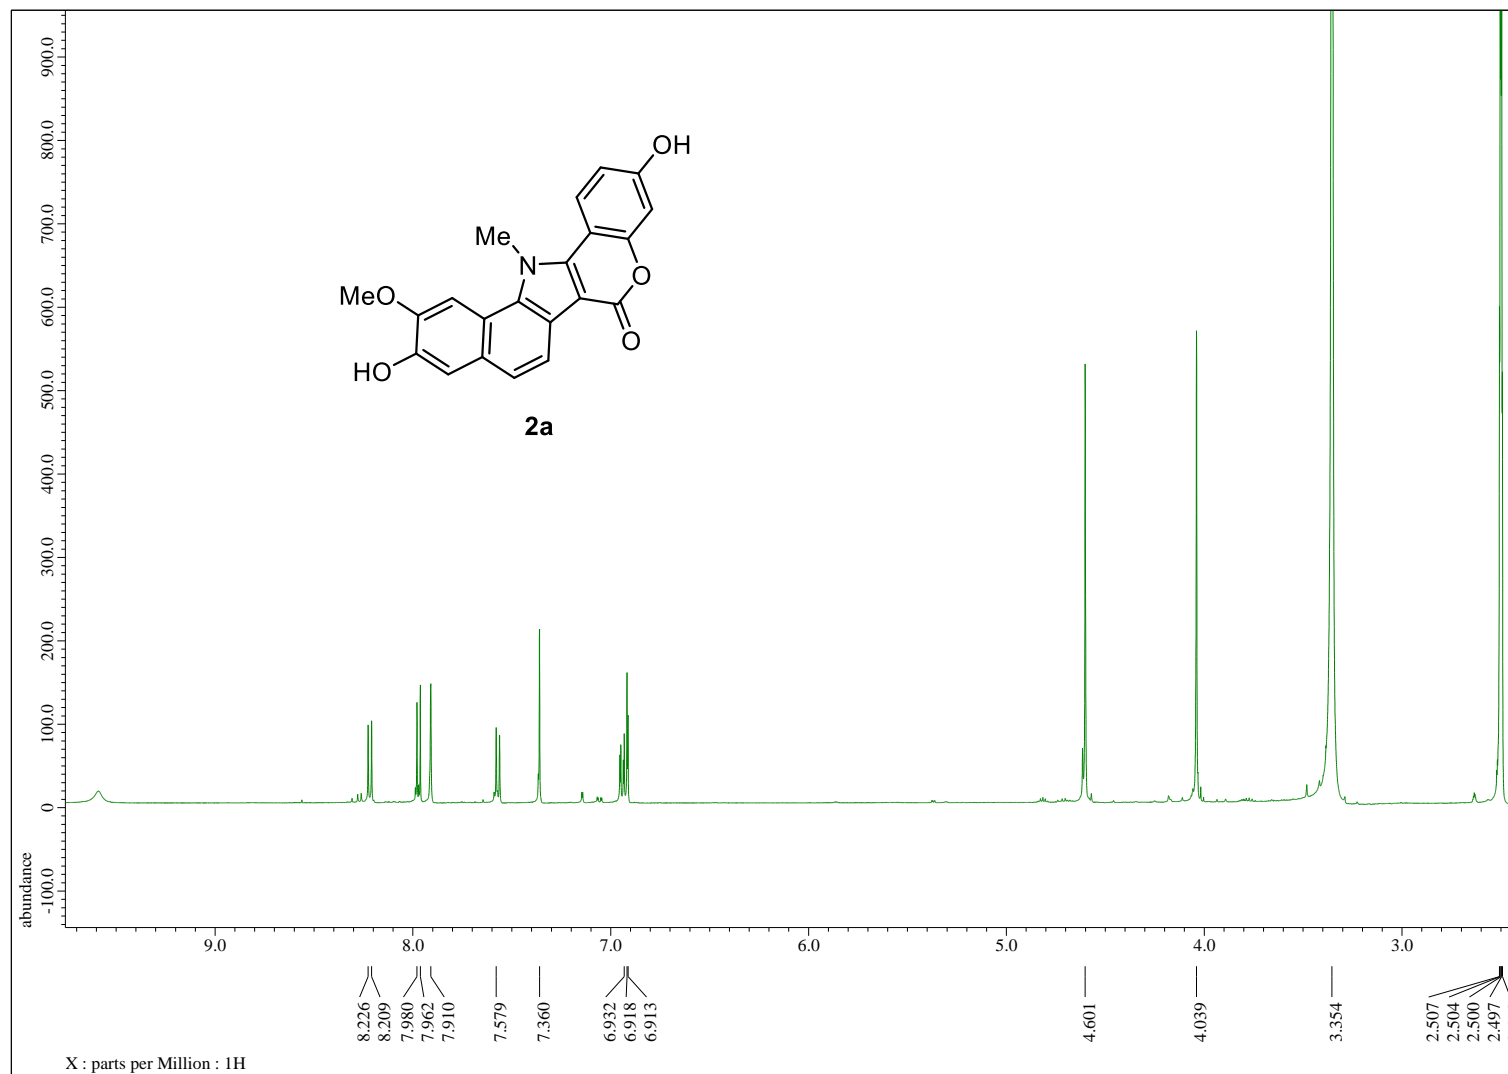

Fig. 58. <sup>1</sup>H NMR Spectrum of Compound 2a (500 MHz, DMSO-d<sub>6</sub>)

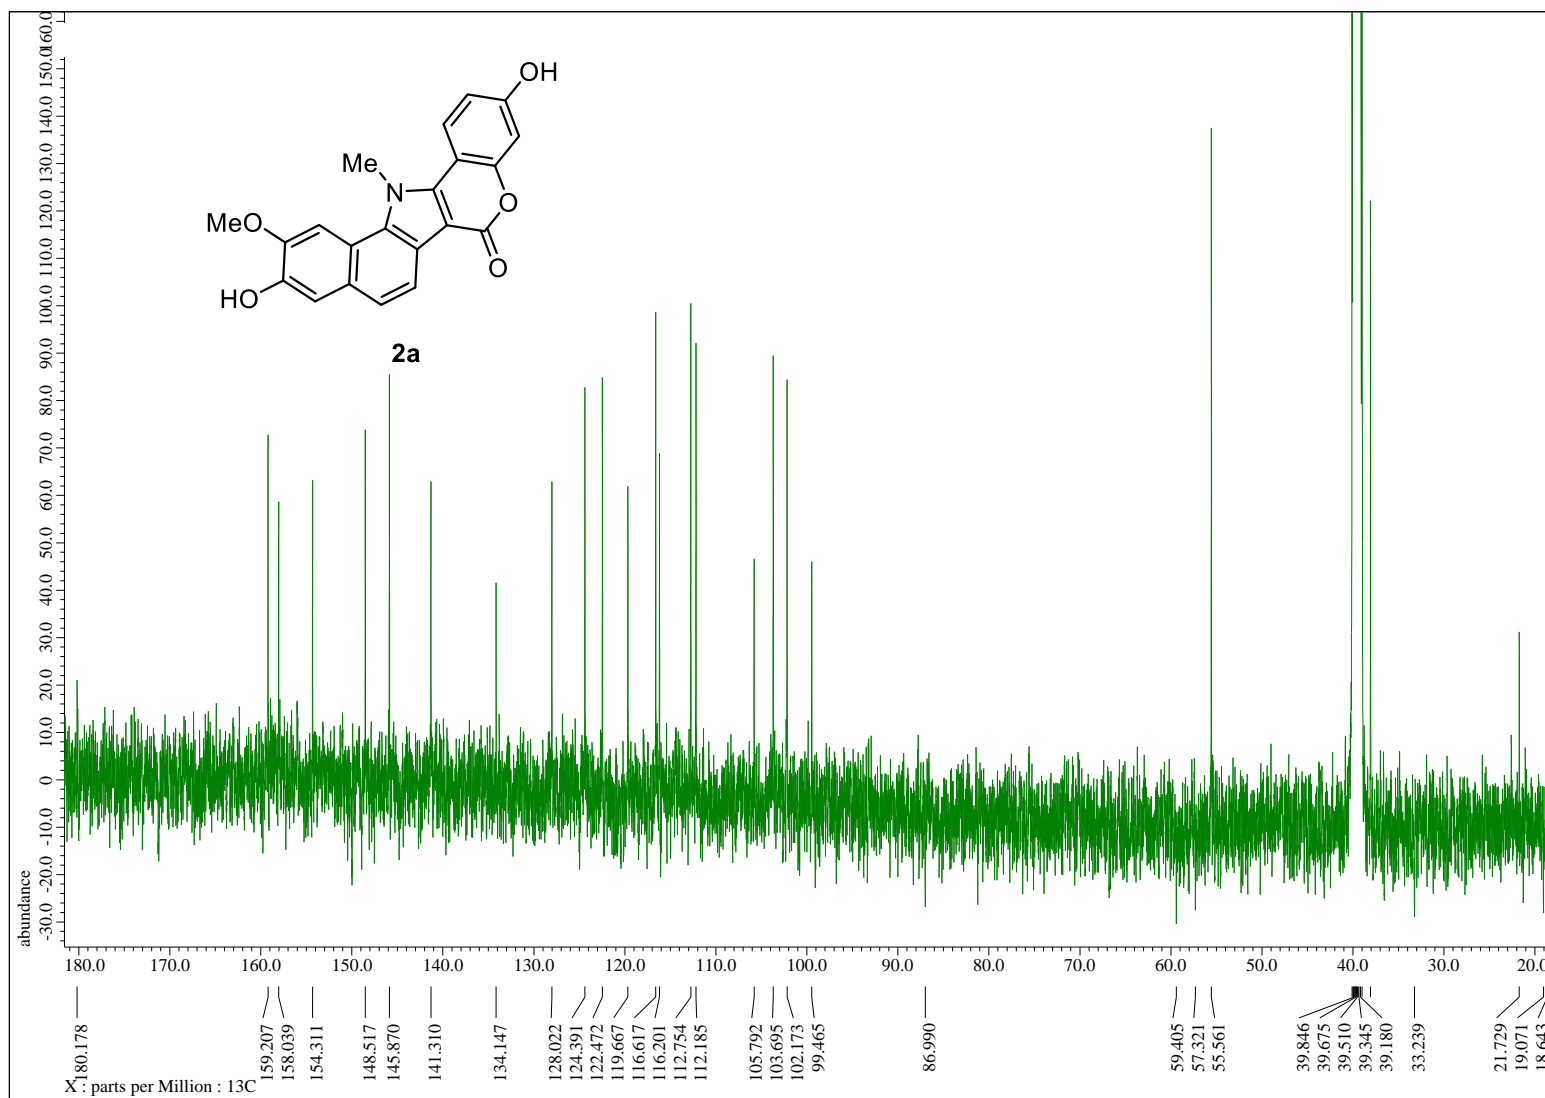

Fig. 59.  $^{13}\text{C}$  NMR Spectrum of Compound **2a** (125 MHz, DMSO- $d_6$ )

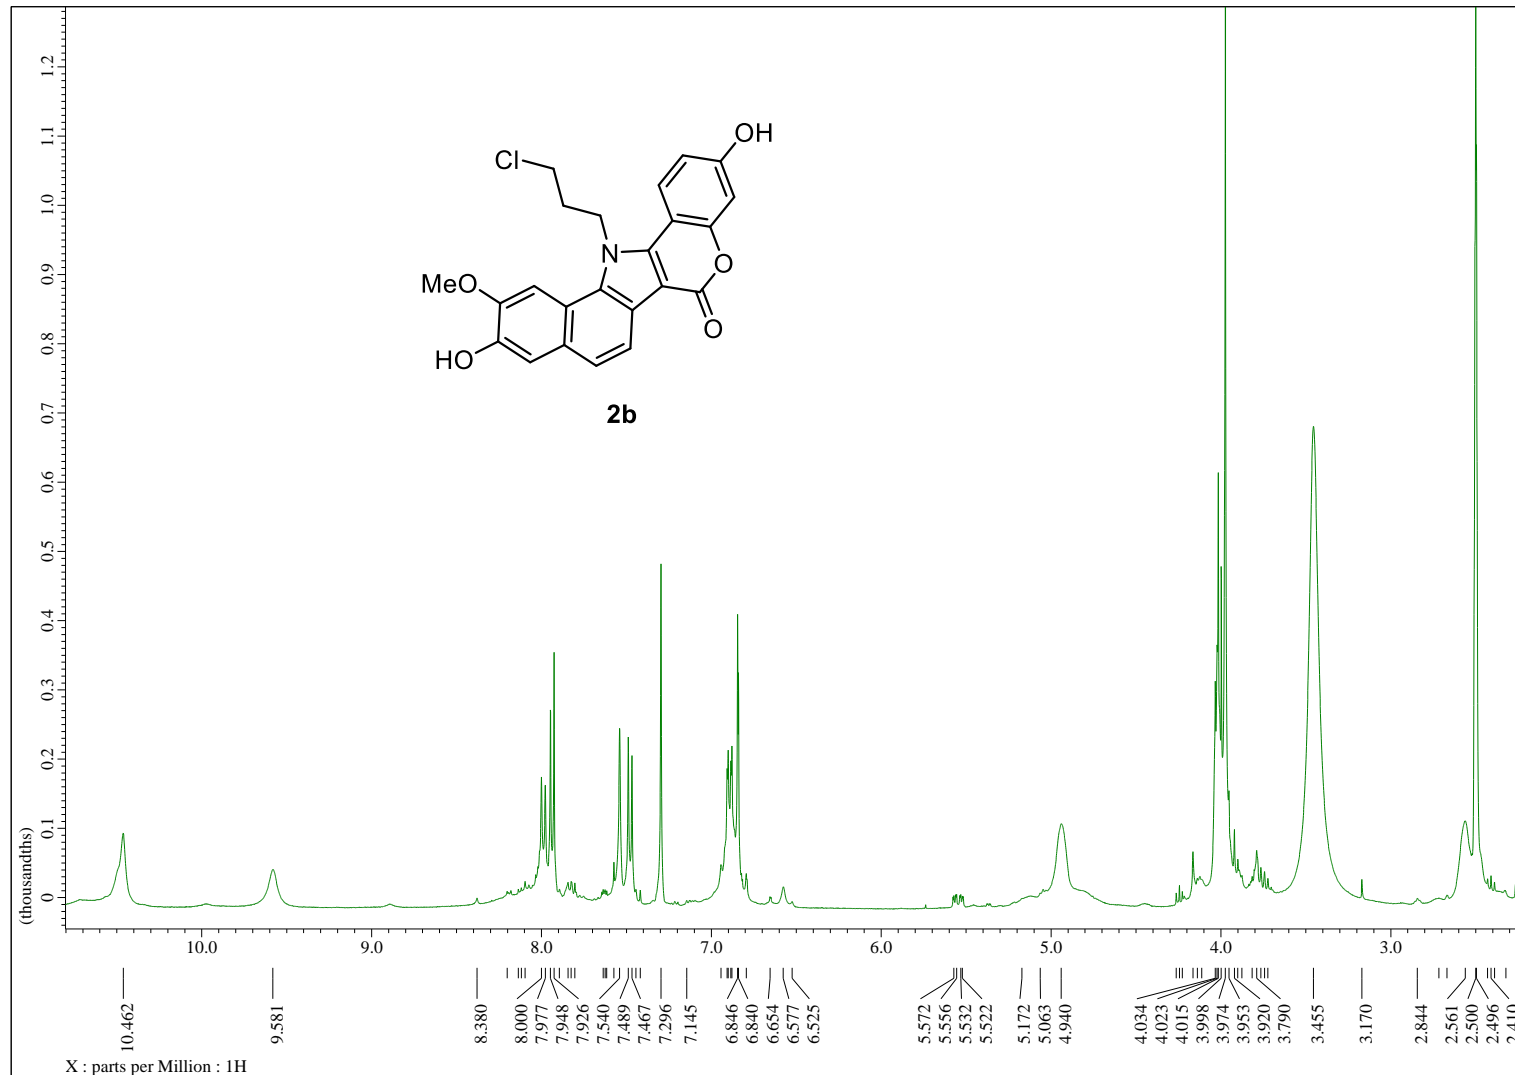

Fig. 60. <sup>1</sup>H NMR Spectrum of Compound **2b** (400 MHz, DMSO-d<sub>6</sub>)



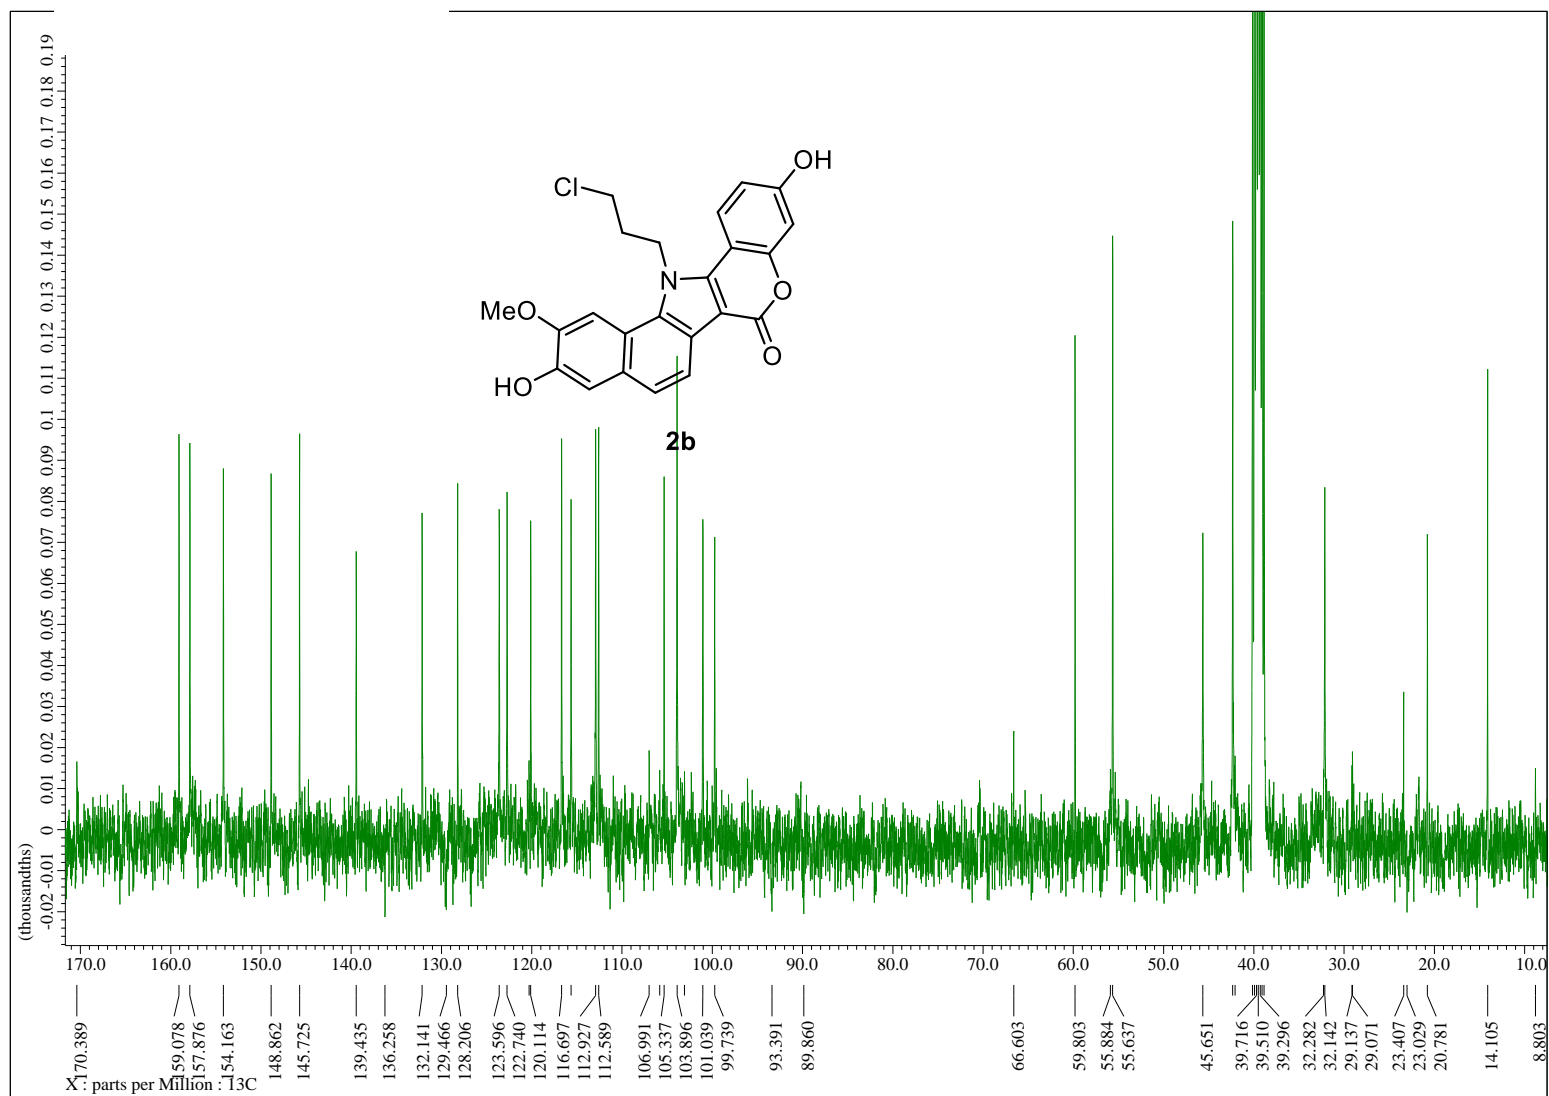

Fig. 61. <sup>13</sup>C NMR Spectrum of Compound **2b** (100 MHz, DMSO-d<sub>6</sub>)

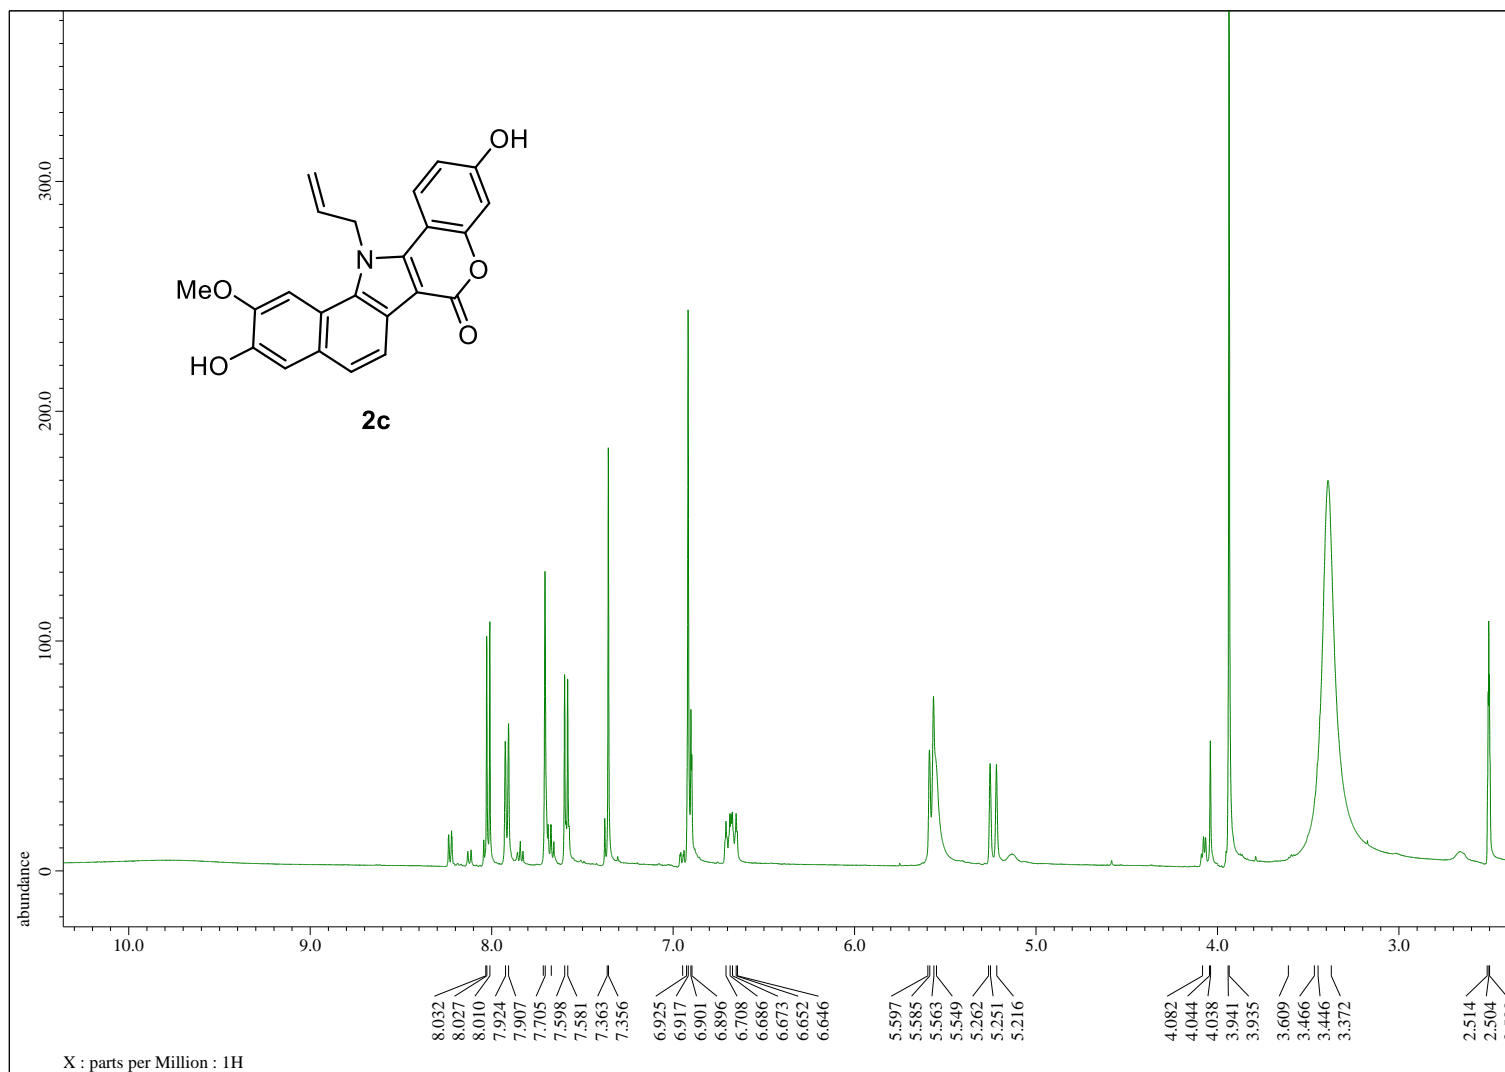

Fig. 62. <sup>1</sup>H NMR Spectrum of Compound **2c** (500 MHz, DMSO-d<sub>6</sub>)

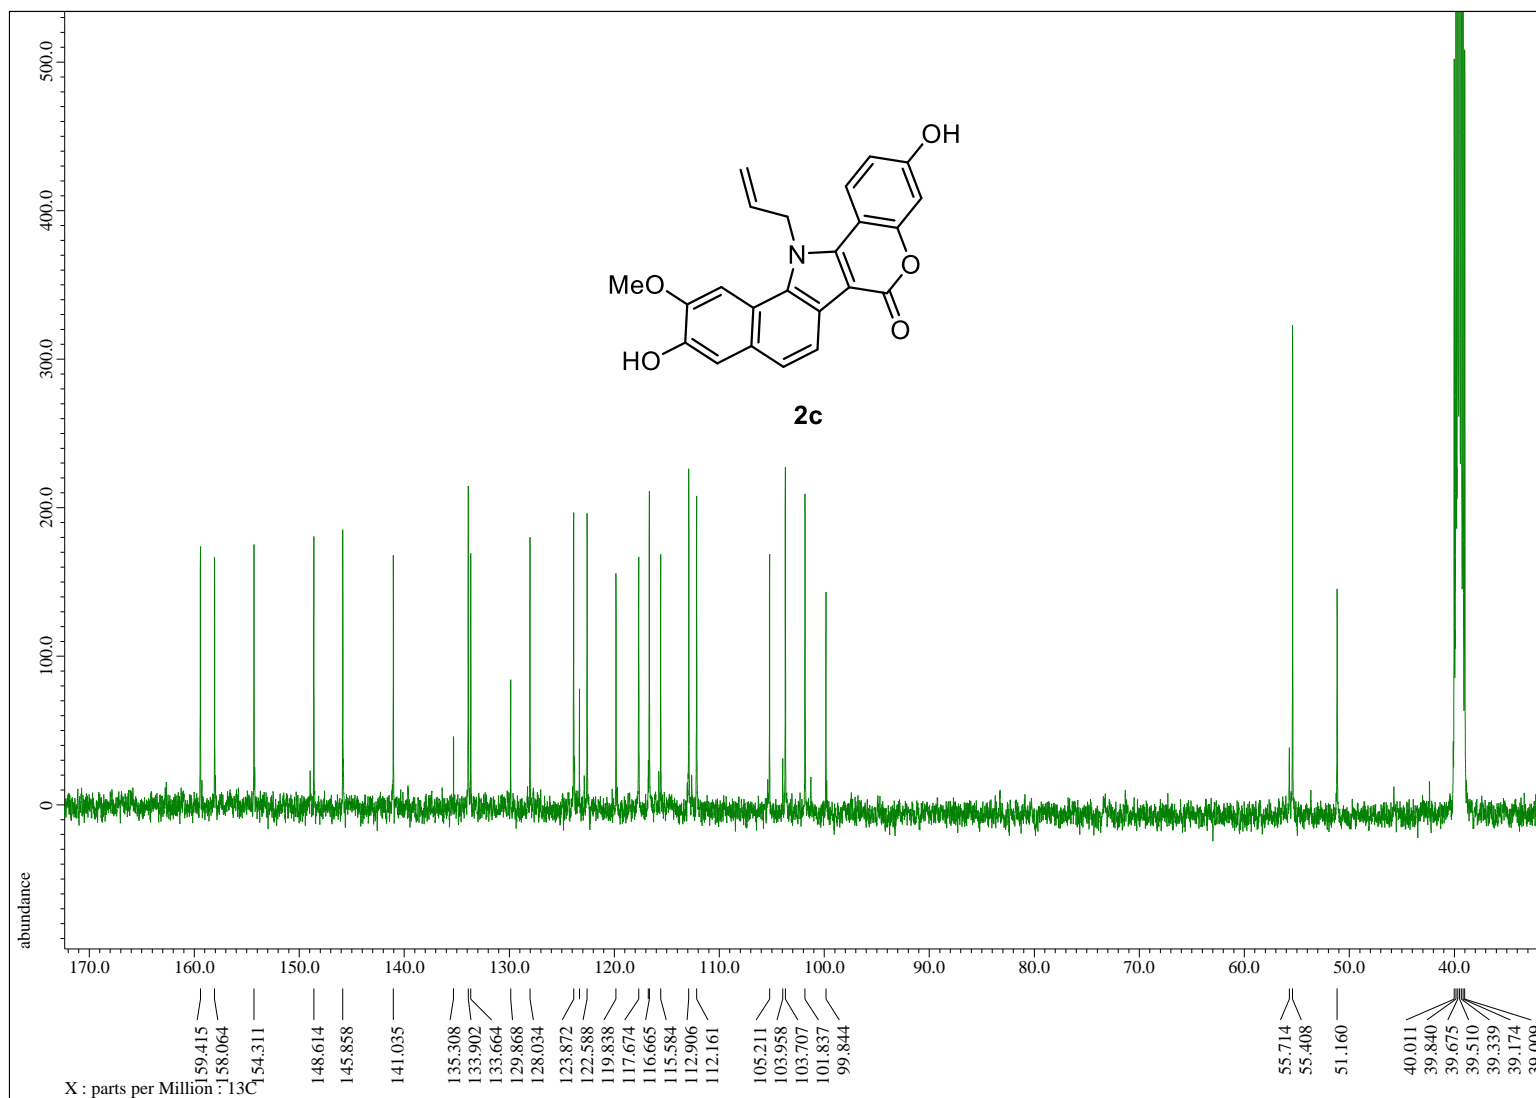

Fig. 63.  $^{13}\text{C}$  NMR Spectrum of Compound **2c** (125 MHz, DMSO- $d_6$ )

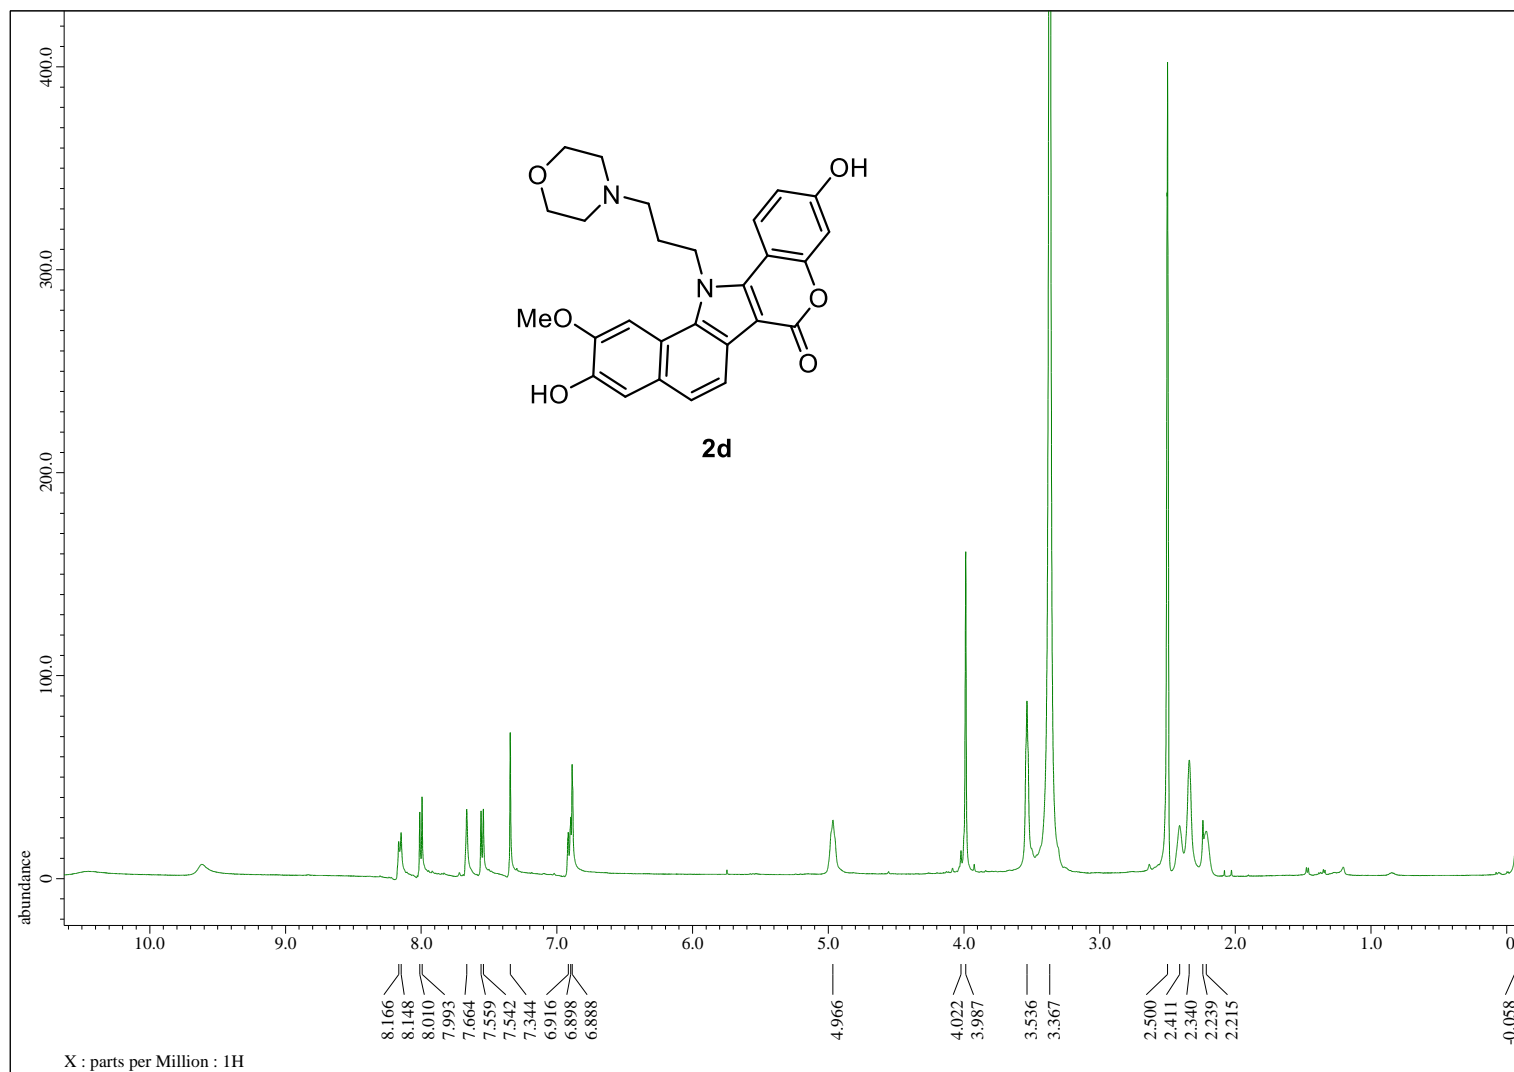

Fig. 64.  $^1\text{H}$  NMR Spectrum of Compound **2d** (500 MHz,  $\text{DMSO-d}_6$ )

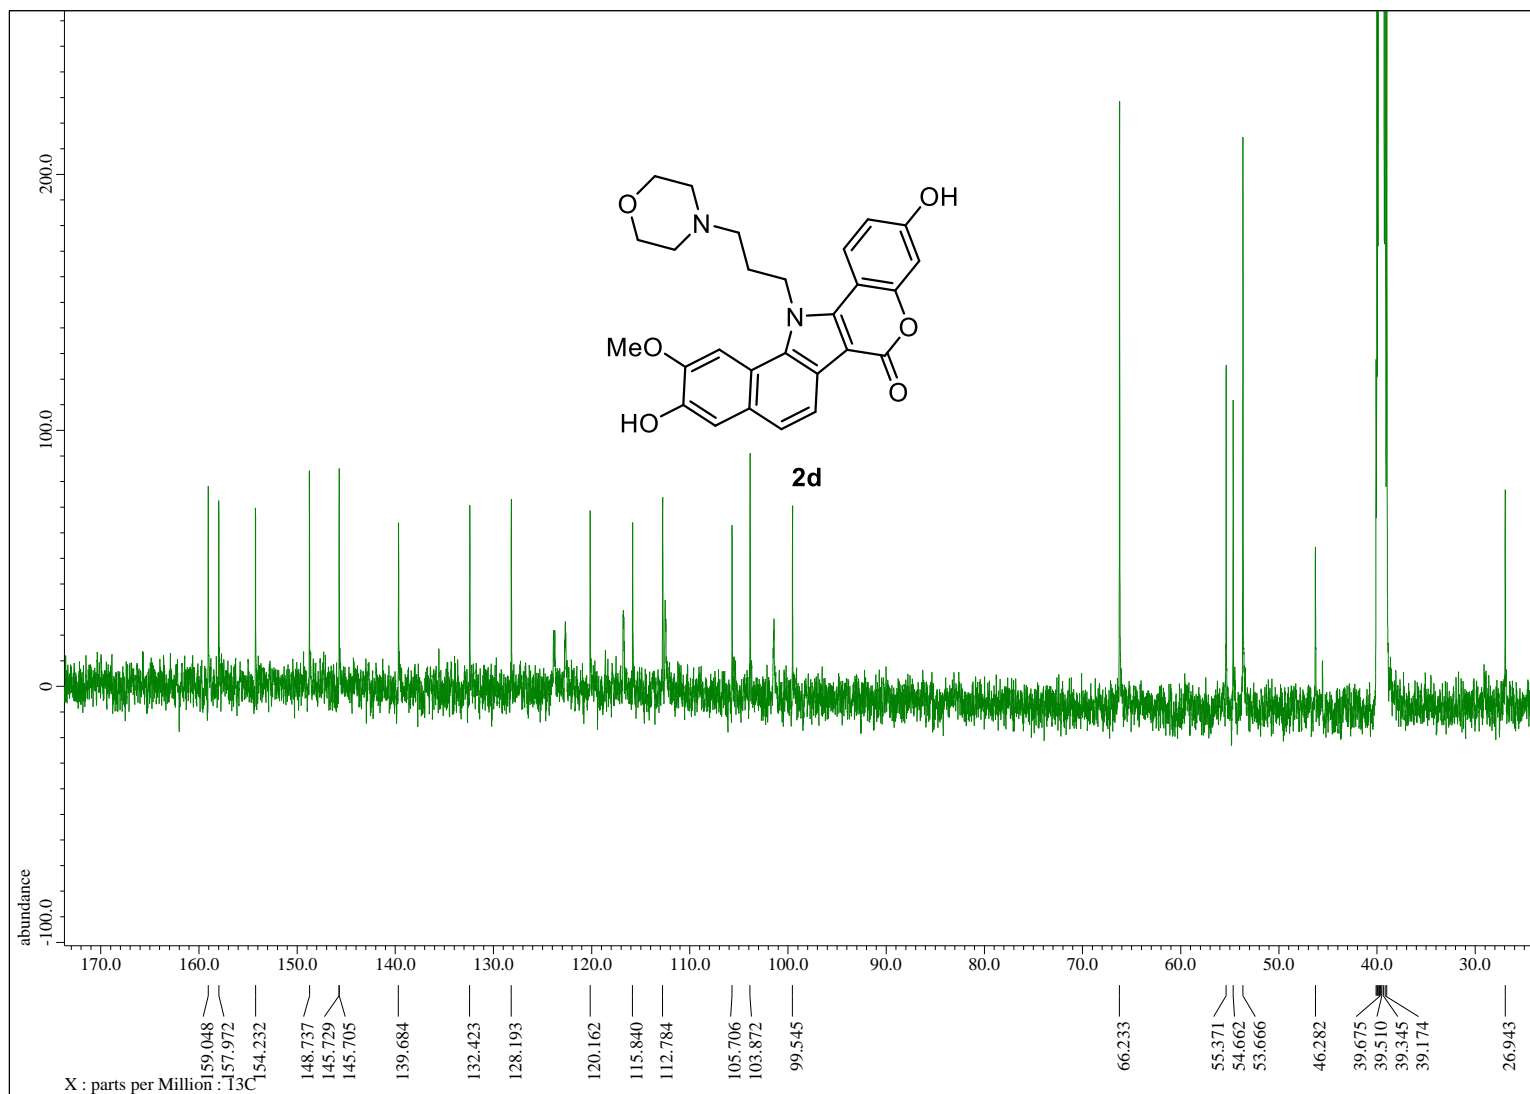

Fig. 65.  $^{13}\text{C}$  NMR Spectrum of Compound **2d** (125 MHz,  $\text{DMSO-d}_6$ )

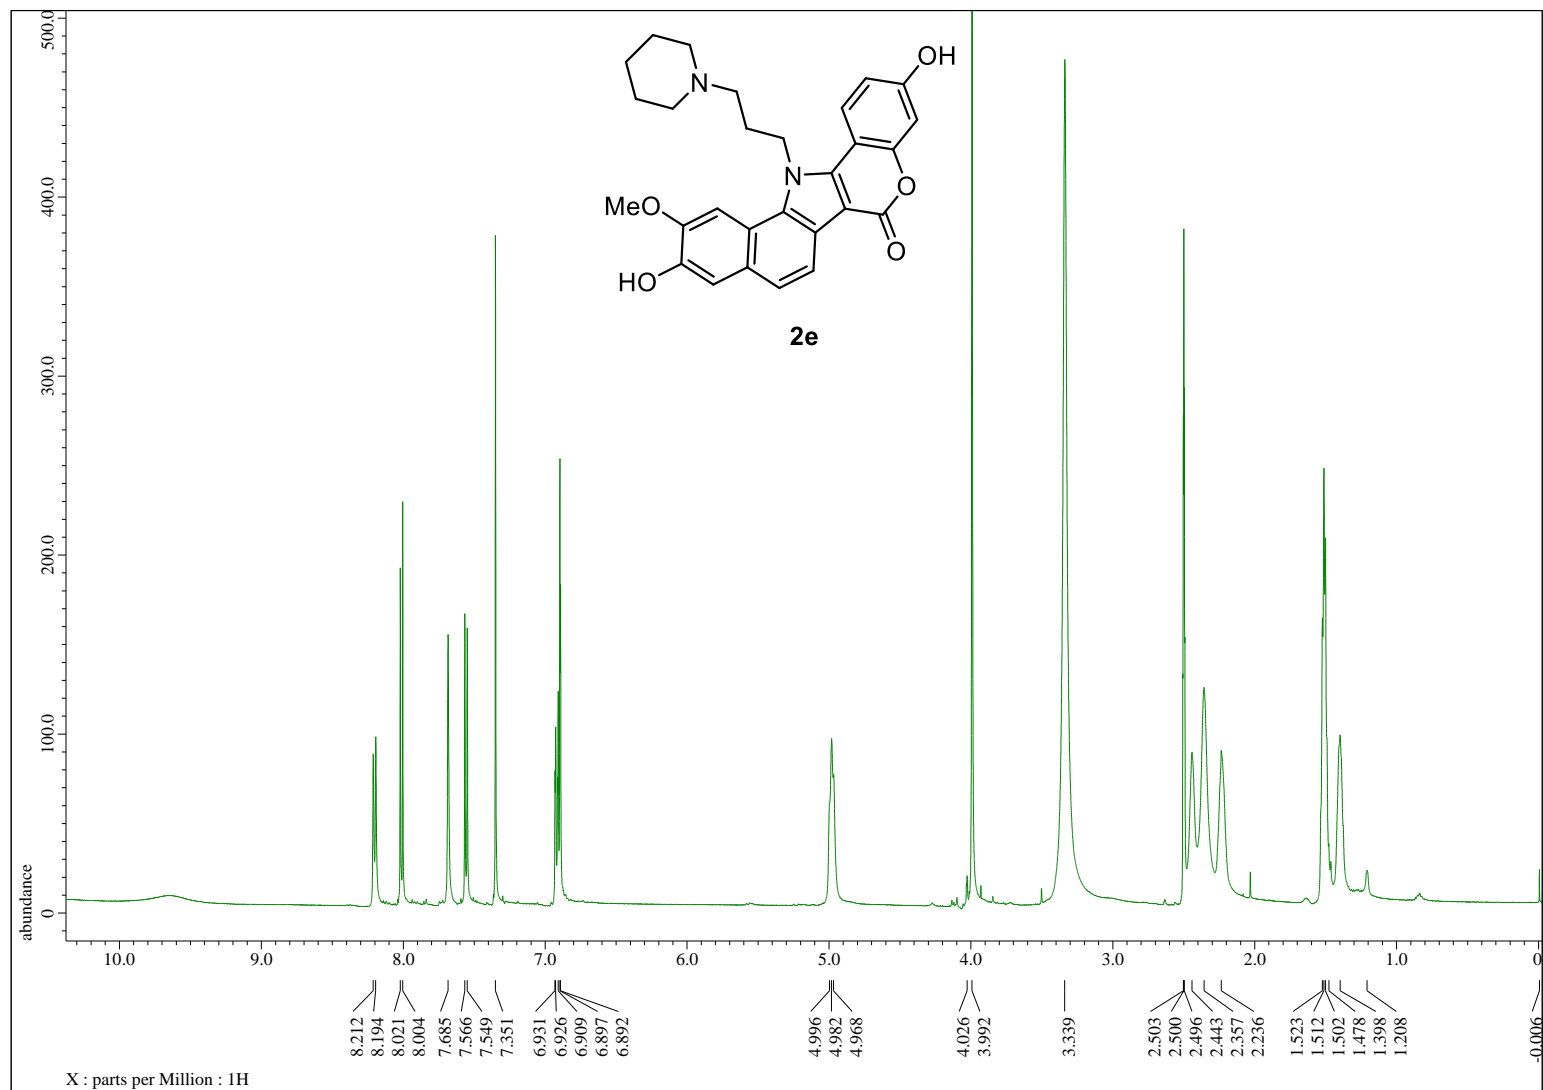

Fig. 66.  $^1\text{H}$  NMR Spectrum of Compound **2e** (500 MHz,  $\text{DMSO-d}_6$ )

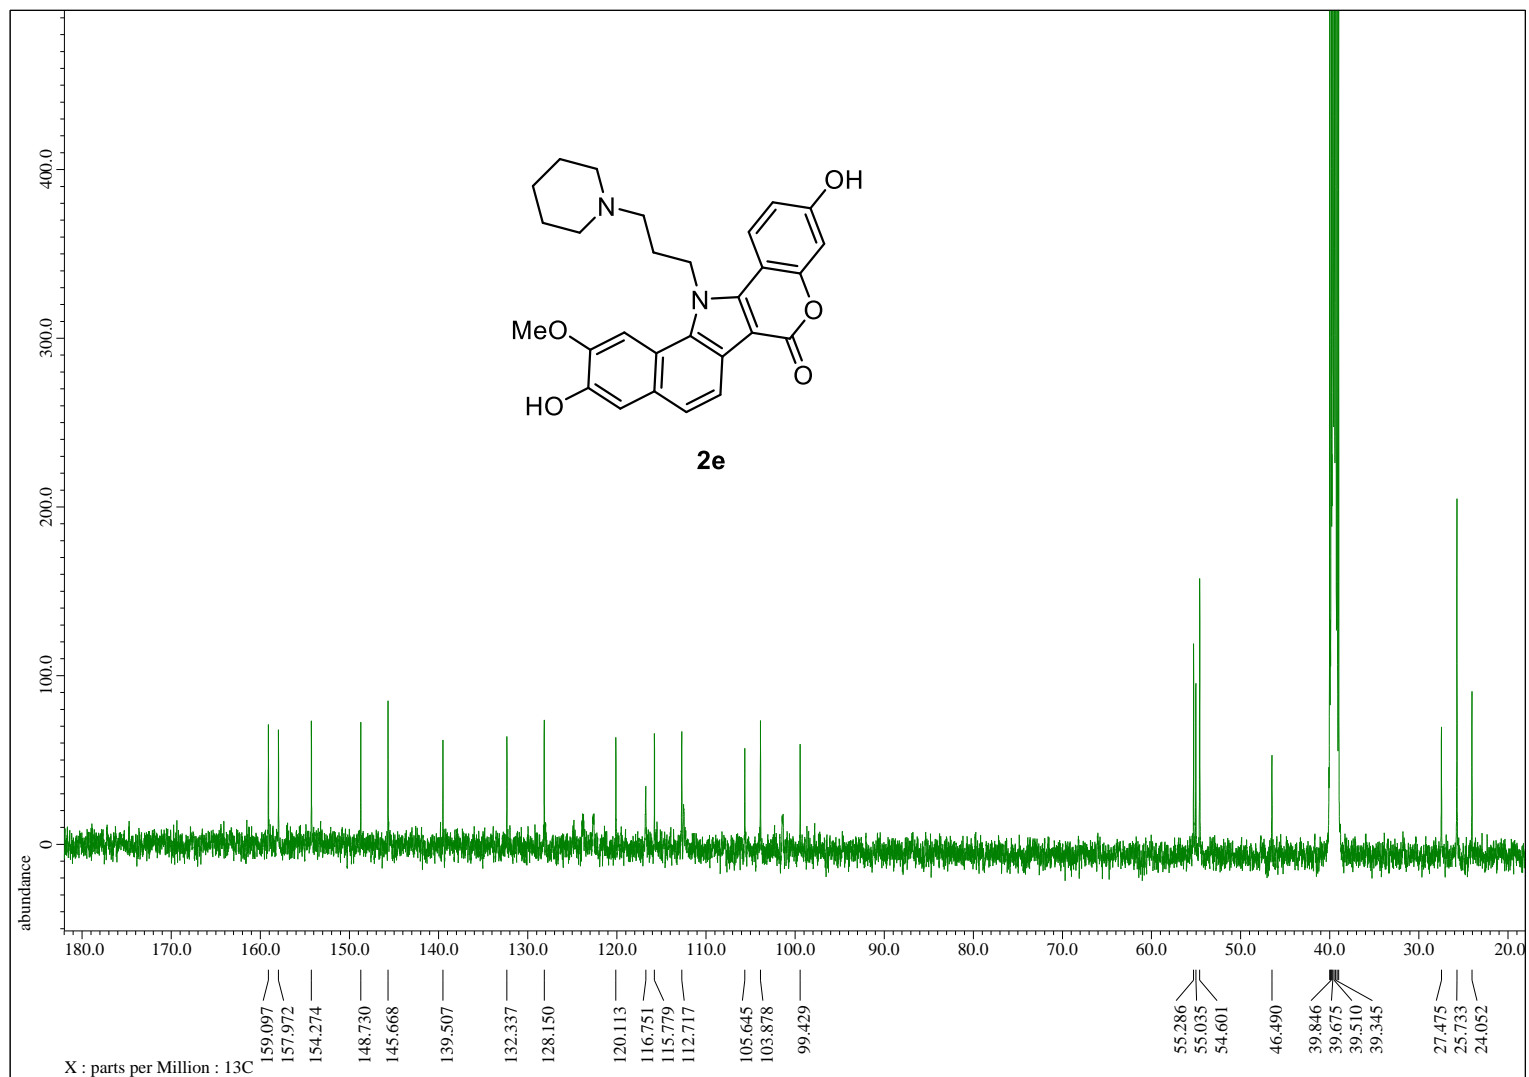

Fig. 67.  $^{13}\text{C}$  NMR Spectrum of Compound **2e** (125 MHz, DMSO- $d_6$ )
